# Cell-sized confinement controls generation and stability of a protein wave for spatiotemporal regulation in cells

Shunshi Kohyama<sup>1</sup>, Natsuhiko Yoshinaga<sup>2,3,\*</sup>, Miho Yanagisawa<sup>4</sup>, Kei Fujiwara<sup>1,\*</sup>, Nobuhide Doi<sup>1</sup>

## Affiliations

<sup>1</sup> Department of Biosciences & Informatics, Keio University, 3-14-1 Hiyoshi, Kohoku-ku, Yokohama 223–8522, Japan.

<sup>2</sup> Mathematical Science Group, WPI Advanced Institute for Materials Research (WPI-AIMR), Tohoku University Katahira 2-1-1, Aoba-Ku, Sendai 9808577, Japan.

<sup>3</sup> MathAM-OIL, AIST, Sendai 980-8577, Japan.

<sup>4</sup> Komaba Institute for Science / Department of Basic Science, Graduate School of Arts and Sciences, The University of Tokyo, 3-8-1 Komaba, Meguro, Tokyo 153-8902 Japan

\*corresponding authors

Natsuhiko Yoshinaga, e-mail: [yoshinaga@tohoku.ac.jp](mailto:yoshinaga@tohoku.ac.jp)

Kei Fujiwara, e-mail: [fujiiwara@bio.keio.ac.jp](mailto:fujiiwara@bio.keio.ac.jp)

23 **Abstract**

24 Min system, which determines the cell division plane of bacteria, uses the localization  
25 change of protein (Min wave) emerged by a reaction-diffusion coupling. Although  
26 previous studies have shown that cell-sized space and boundaries modulate shape and  
27 speed of Min waves, its effects on Min wave emergence was still elusive. Here, by using a  
28 fully confined micro-sized space as a mimic of live cells, we revealed that confinement  
29 changes conditions for Min wave emergence. In the micro-sized space, an increase of  
30 surface-to-volume ratio changed the localization efficiency of proteins on membranes, and  
31 therefore, suppression of the localization change was necessary to produce stable Min  
32 wave generations. Furthermore, we showed that the cell-sized space more strictly limits  
33 parameters for wave emergence because confinement inhibits instability and excitability  
34 of the system. These results illuminate that confinement of reaction-diffusion systems  
35 works as a controller of spatiotemporal patterns in live cells.  
36  
37  
38  
39

## 40 Introduction

41 Spatiotemporal self-organization of biomolecules in cells takes on a fundamental  
42 mechanism to maintain cellular structure. In particular, the intracellular reaction-diffusion  
43 wave (iRD) is an essential mechanism for various spatiotemporal regulation including  
44 DNA segregation (1), cell-shape deformation, cell migration (2, 3), and cell polarization  
45 (4). A remarkable example of iRD is Min wave, which is a bacterial spatiotemporal  
46 organization system (Min system). The Min system precisely places the division site at the  
47 center of the cell by using iRD (5, 6). This system comprises three proteins called MinC,  
48 MinD, and MinE with localization of MinD and MinE oscillating between one pole to the  
49 other by a coupling between biochemical reactions and molecular diffusions (6, 7). MinC  
50 has no role in the Min wave but rather inhibits polymerization of a cell division initiation  
51 factor (FtsZ) by following the Min wave. This process enforces initiation of cell division  
52 only at the center of cells (5, 6).

53  
54 To date, Min wave is the only biological RD system reconstituted *in vitro*. Reconstitution  
55 of Min wave was firstly shown by spotting a mixture of MinD, MinE, and ATP on 2-  
56 demensinal (2D) planar membranes comprising *E. coli* polar lipid extract in open  
57 geometry(7). The following studies based on a 2D planar system have clarified the  
58 mechanisms of wave generation and the characteristics of Min waves (8-13). *In vitro*  
59 studies have demonstrated that external environments such as boundary shape, protein  
60 concentration, and lipids alter patterns, velocities, wavelengths and shapes of Min waves  
61 (9-14). In particular, boundary shapes prepared by PDMS chambers significantly change  
62 the behavior of Min waves with studies showing that a rod-shape is important in terms of  
63 inducing the pole-to-pole oscillation found in living cells (10, 12, 13).

64  
65 Due to the importance of Min waves for initiating division at a precise location, the  
66 timing, conditions, and regulation of their emergence should be investigated. However,  
67 despite the critical conditions for Min wave emergence including environmental effects  
68 having been surveyed in open space, the effect of confinement in cell-sized space, which  
69 is one of the most remarkable features of living cells, has been poorly addressed. Although  
70 some studies have reported reconstitution of Min waves in fully confined cell-sized spaces  
71 (12, 13, 15), lipid conditions were modified or spaces were closed after observing wave  
72 generation. The necessity of these treatments suggests that cell-sized space affects the  
73 condition for Min wave emergence.

74  
75 Recent studies have unveiled that confinement inside cell-sized space alters both behaviors  
76 of biochemical reactions and molecular diffusions (16-18). Because RD waves appear  
77 only in limited parameter ranges (19, 20), encapsulation inside cell-sized space should  
78 shift the condition for Min wave emergence such as diffusion and interaction of its  
79 elements. Moreover, considering that interference of the RD waves at the time of two-  
80 wave collision (21) and initiation of Min waves by interaction among Min proteins on 2D  
81 planar membranes (7), it is plausible that the condition for wave emergence in a small  
82 space for only a single wave is different from that in large spaces for multiple waves.

83  
84 In this study, we investigated the generation mechanism of Min waves in micro-sized  
85 closed space fully covered with *E. coli* polar lipid extract. Our experimental and  
86 theoretical analyses revealed that a fully confined micro-sized space changes the rate of  
87 protein localizations, and therefore, elements to cancel the effect were necessary to  
88 produce Min waves in a small space. Furthermore, our results show that cell-sized space

89 itself enrolls on spatio-temporal regulation via RD mechanisms in living cells by making  
90 the emergence mechanism distinct from open system such as *in vitro*.

## 93 Results

### 94 ***MinDE are insufficient for emerging Min waves in micro-sized space fully covered with*** 95 ***E. coli polar lipid extract***

96 Previous works have reported that only MinD, MinE, and ATP are necessary and sufficient  
97 for generation of Min waves on 2D planar membranes of *E. coli* polar lipid extract (7)  
98 (Figure 1A) and in fully confined cell-sized space by using a modified lipid mixture(12, 15).  
99 The Min wave in open geometry has been well characterized in many laboratories (8, 11,  
100 13), and has also been reproduced by using materials prepared in our laboratory (sfGFP-  
101 MinD and MinE-mCherry)(Figure 1B). Then, we encapsulated these materials in micro-  
102 sized space fully covered with *E. coli* polar lipid extract using an emulsification method (12,  
103 22). However, we found that sfGFP-MinD, MinE-mCherry, and ATP are insufficient for  
104 Min wave emergence in the microdroplets covered with *E. coli* polar lipids (Figure 1C,  
105 Video 1). Usage of non-fluorescent tagged MinDE tracked by sfGFP-MinC indicated that  
106 fluorescent proteins fused with MinD or MinE could not explain the lack of wave  
107 occurrence (Figure 1—figure supplement 1AB). In contrast, sfGFP-MinD, MinE-mCherry,  
108 and ATP induced Min waves in microdroplets covered with a lipid mixture (85% DOPC  
109 and 15% Cardiolipin), as reported previously (12) (Video 2). These results indicated that  
110 encapsulation of micro-sized space fully covered with lipid alters some critical parameters  
111 for Min wave emergence compared to the case for 2D membranes.

### 113 ***Addition of protein crowder assists Min wave emergence in cell-sized droplets***

114 The difference of emergence conditions between being located on 2D and in 3D closed  
115 space raised a possibility that some factors other than MinDE regulates Min wave  
116 emergence in living cells. From the fact that lipid species change conditions for Min wave  
117 emergence, we assumed that changes of balance between reaction and diffusion by some  
118 factors such as physicochemical environments are associated with this difference.

119 As a candidate for such a factor, we focused on molecular crowding in cells. In living  
120 cells, ~30% of cell mass consists of macromolecules, and such crowding modulates both  
121 biochemical reactions and molecular diffusion (23, 24). Thereby, crowding is likely  
122 associated with patterns associated with reaction-diffusion systems. In fact, crowding agents  
123 that emulate molecular crowding *in vitro* have been shown to affect coupling of Min waves  
124 over membrane gaps (25) and wavelength of Min waves in the presence of FtsZ system  
125 (26).

126 To test this possibility, synthetic polymers (PEG8000 or Ficoll70), or a protein-based  
127 crowding agent (BSA) were mixed with MinDE and ATP with the mixtures then being  
128 encapsulated in microdroplets covered with *E. coli* polar lipid. Remarkably, co-  
129 supplementation of BSA at high concentration (100 mg/mL) with Min proteins induced Min  
130 wave emergence (Figure 1D, Video 3), while neither PEG8000 nor Ficoll70 induced Min  
131 waves (Video 4 and 5). Supplementation of BSA also induced Min wave emergence in the  
132 case of no fluorescence-tagged MinDE being tracked by sfGFP-MinC (Figure 1—figure  
133 supplement 1C, Video 6).

134 Varying concentrations of MinD and MinE indicated that both proteins should be  
135 around 1  $\mu\text{M}$  to lead the emergence of Min waves (Figure 1E), consistent with their



136 concentrations *in vivo*(27). ATP replacement with ADP or ATP $\gamma$ S, or replacement of MinD  
137 with an ATPase-deficient mutant(28), showed that the Min wave depends on ATP (Figure  
138 1—figure supplement 2), similar to the case for 2D planar membranes (7). The frequent  
139 patterns observed were pole-to-pole oscillations and traveling waves (Figure 1—figure  
140 supplement 3), as noted by a previous study using modified lipids (12). MinE was enriched  
141 at the tail of the traveling wave (Figure 1F top) and was enriched at both tails of the wave in  
142 the case of pole-to-pole oscillations (Figure 1F bottom). These MinE enrichments were  
143 similar to the previous reports of traveling waves on 2D planar membranes (7), and the E  
144 ring observed in living cells with such pole-to-pole oscillations (5).

### 145 146 ***BSA modifies attachment of MinE on membranes without MinD***

147 To understand why the emergence condition for Min wave differs between being located on  
148 2D planar membranes and in 3D closed geometry, we investigated the mechanism of wave  
149 emergence induced by BSA in micro-sized closed space. It has been known that crowding  
150 agents changes reaction rates, diffusion rates, and increase association rates by depletion  
151 force (23, 24). Thus, we first assumed that BSA may change reaction rates of MinD and  
152 MinE binding each other or to the membrane, decrease diffusion constants of MinD and  
153 MinE in the cytosol, and increase association rates between macromolecules by a depletion  
154 force. Among these effects, the effect of depletion force is excluded because previous  
155 studies have indicated that BSA shows little depletion force in contrast to PEG8000 or  
156 Ficoll70, which show a strong depletion force (24).

157 First, diffusion of macromolecules inside closed space was evaluated by using  
158 fluorescence correlation spectroscopy (FCS) and Fluorescence Recovery After Photo-  
159 bleaching (FRAP). FCS revealed that diffusion rates of GFP in cytosolic parts at 50 mg/mL  
160 BSA were similar to that in non-crowding conditions, but decreased at over 100 mg/mL  
161 (Figure 2A). However, we found that Min waves were stably generated even at 50 mg/mL  
162 of BSA (Figure 2—figure supplement 1). The effect of BSA on diffusion of sfGFP-MinD  
163 on membranes was investigated by FRAP and it was found that even 100 mg/mL of BSA  
164 slightly but did not significantly decrease the diffusion rates of MinD on lipid membranes of  
165 various sizes of microdroplets (Figure 2B).

166 Next, to test the effect of BSA on reactions, we employed a pull-down assay to analyze  
167 the direct association of BSA with MinD or MinE. BSA was mixed with MinD or MinE  
168 immobilized on Ni-NTA beads through a histidine-tag. The pull-down assay showed that  
169 BSA flowed through the Ni-NTA with Min proteins, and therefore, no BSA band was found  
170 after eluting MinD or MinE by imidazole. These results indicated that BSA does not  
171 directly bind MinD or MinE. Similarly, the pull-down assay involving the use of  
172 MinD<sup>D40A</sup>  $\Delta$ 10 which kept binding with MinE due to its lack of ATPase activity (29),  
173 suggested that BSA does not enhance interaction of the MinDE complex (Figure 2C).

174 Finally, we found that BSA changes localization of MinE between cytosolic parts and  
175 on membranes. Each sfGFP-MinD and MinE-mCherry was encapsulated in micro-sized  
176 space fully covered with *E. coli* polar lipid, and localization of MinD and MinE was  
177 visualized using confocal fluorescence microscope. In the absence of BSA, almost all of the  
178 MinD and MinE were similarly localized on membranes. In contrast, BSA addition  
179 drastically changed the localization. In the presence of BSA, changes of MinD localization  
180 were relatively few, but localization of MinE on membranes completely disappeared  
181 (Figure 2D). Because sfGFP alone or BSA at low concentration (1 mg/mL) does not  
182 localize on membranes (Figure 2D), the spontaneous localization of MinE was not derived

183 from a faulty membranes. These results suggested that changes in localization of MinE is a  
184 key feature for emergence of waves in microdroplets.

### 185 186 ***Suppression of spontaneous membrane localization of MinE is the key to emergence of*** 187 ***Min waves in micro-sized space***

188 To quantify the details of MinE localization in microdroplets, we employed an index value  
189 for the localization ratio ( $c/m$ ) obtained by dividing the concentration of MinE in cytosolic  
190 parts ( $c$  [ $1/\mu\text{m}^3$ ]) by those on membranes ( $m$  [ $1/\mu\text{m}^2$ ]) (Figure 3A). Both concentrations are  
191 expressed by characteristic concentrations in the cytosol,  $c_b$ , and on the membrane,  $c_s$ , such  
192 as  $c = c_0 c_b$  and  $m = m_0 c_s$ , respectively. Here, we may freely choose the values of the  
193 characteristic concentrations, which would accordingly change the values of unitless  
194 concentrations  $c_0$  and  $m_0$ . It is reasonable to assume that these quantities are proportional  
195 to the fluorescence intensity at the position at the cytosol  $I_b$  and on the membrane  $I_s$  with  
196 possibly different proportional constants as  $c_0 = \alpha_b I_b$  and  $m_0 = \alpha_s I_s$ , respectively. This  
197 argument ensures that the localization ratio ( $c/m$ ) is identified as  
198  $c/m = (\alpha_b c_b / (\alpha_s c_s)) I_b / I_s$  with the ratio of fluorescence intensity up to a proportional  
199 constant. This argument implies that the relative value of  $c/m$  is a relevant quantity.

200 We measured fluorescence intensities at the center of microdroplets and the edges of  
201 signals. In this case,  $c/m$  becomes 1 when MinE is not localized on the membrane, whereas  
202  $c/m$  becomes 0 when all MinE localize on membranes. As shown in Figure 3B, the  $c/m$  of  
203 MinE increased in proportion to BSA concentrations.

204 Then, we investigated the relation between  $c/m$  and the probability of Min wave  
205 emergence. Plots of wave emergence probability as a function of  $c/m$  controlled by BSA  
206 concentration showed that its relation is a sigmoidal as a threshold function (Figure 3C).  
207 Min waves were observed in a small fraction of microdroplets at  $c/m < 0.4$  ( $< 1$  mg/mL  
208 BSA), and in almost all microdroplets at  $c/m > 0.7$  ( $> 30$  mg/mL BSA).

209 To check whether or not the effect is specific to BSA, we tested another protein crowder  
210 — a cell extract of *E. coli* prepared by sonication (24). In this case, we added an ATP  
211 recycling system to suppress ATP depletion due to the components of the cell extract.  
212 Addition of the cell extract modulate  $c/m$  of MinE was similar to the case for BSA,  
213 although its effect was stronger than BSA (Figure 4D). Moreover, the cell extract also led to  
214 the emergence of Min waves in the microdroplets covered with *E. coli* polar lipid extract  
215 (Video 7). The relation between  $c/m$  and the probability of Min wave emergence was  
216 similar to that of BSA (Figure 4E). These results indicated that high  $c/m$  is required for  
217 stable emergence of Min waves in a 3D closed geometry.

218 Under conditions using macromolecular crowding reagents which do not lead to the  
219 emergence of Min waves (PEG8000 and Ficoll70),  $c/m$  was as low as similar to that without  
220 BSA (Figure 3F). Then, we checked  $c/m$  in the case of microdroplets covered with the  
221 modified lipid condition (15% cardiolipin and 85% DOPC), which causes Min waves  
222 without BSA. In the modified lipid case,  $c/m$  was near 0.4 (Figure 3F), which is as high as  
223 the minimal  $c/m$  value of BSA required for Min wave emergence. These results supported  
224 the notion that suppression of attachment of MinE on membrane without the aid of MinD is  
225 the key to emergence of Min waves in micro-sized space.

226 Experiments using a MinE mutant further supported the importance of the  $c/m$ . Recent  
227 studies have suggested that the conformation of MinE is in equilibrium between a free state

228 of membrane targeting sequences (MTS) at the N-terminal (open conformation) and a  
229 packed structure (closed conformation). Open conformation preferably binds membranes,  
230 and several MinE mutants shift this equilibrium to the open state (14, 29). For an example,  
231 the I74M mutant of MinE stably maintains the open state, and the I74M mutant localizes on  
232 the membrane in *Δmin E. coli* cells, while wild-type MinE uniformly distributes in the  
233 cytoplasm (29). Our *c/m* analysis showed that the spontaneous membrane localization of  
234 I74M was less sensitive to BSA concentrations than that of wild type (Figure 3B). To match  
235 this result, no waves were observed even under 50mg/mL BSA conditions in the case of the  
236 I74M mutant (Figure 3G, Video 8).

### 237 238 ***Space sizes of microdroplets changes the rate of spontaneous MinE membrane*** 239 ***localization***

240 As spatial factors to determine *c/m* of MinE, we can raise maximum levels of attachment  
241 on membranes and total amounts of MinE. In smaller microdroplets, the surface-area-to-  
242 volume ratio is large, and therefore, almost all MinE can localize on the membrane  
243 (meaning *c/m* ~ 0). By contrast, levels of MinE on membranes is near maximum levels for  
244 membrane localization in large spaces such as those found on 2D lipid bilayers, which  
245 derives a larger *c/m*. In fact, *c/m* in the case of 2D lipids, showing Min wave emergence in  
246 the absence of BSA, was estimated to be 0.76 (Figure 4—figure supplement 1). If this  
247 assumption true, *c/m* increases in proportion to sizes of microdroplets and its response to  
248 the space size is sensitive to MinE concentrations used.

249 To verify this point, we investigated the localization of MinE in various sizes of  
250 microdroplets in the absence of BSA. In small microdroplets with 10 μm diameter, *c/m* was  
251 near 0 and the value increased in higher concentrations of MinE. In larger microdroplets,  
252 *c/m* increased in proportion to the MinE amounts. Moreover, the increase of *c/m* was  
253 strongly dependent on MinE concentration. The diameter of microdroplets in which *c/m*  
254 reached 0.5 was approximately 45 μm at 10 μM MinE, and around 70 μm at 3 μM MinE  
255 (Figure 4). In the case of 1 μM MinE, *c/m* was maintained low within <130 μm (Figure 4).  
256 We should note that, in the presence of 10 mg/mL BSA, a minimum BSA concentration for  
257 Min wave emergence in microdroplets, *c/m* did not increase in size but was maintained  
258 high irrespective of droplet size (Figure 4—figure supplement 2). We also emphasize that at  
259 high concentration of MinE, Min wave did not emerge while MinE indicated high *c/m* ratio  
260 (Figure 1E, Figure 4). This suggests that high concentration of MinE inhibits wave  
261 emergence by other means, such as unbalanced MinDE ratios leading to a defect in typical  
262 turnover rates.

### 263 264 ***Computational simulation for Min wave supports the importance of MinE localization for*** 265 ***wave emergence***

266 To understand the importance of MinE localization, we examined Min wave generation  
267 using computational simulations (see Methods and Appendix 1—3). We considered two  
268 models. Model I (Figure 5—figure supplement 1A) is simply based on the model proposed  
269 in (30) whereas Model II (Figure 5—figure supplement 1B) is based on a combination of  
270 the two models proposed in (30) and (31) to incorporate the effects of persistent MinE  
271 membrane binding and transformation from ADP-MinD to ATP-MinD in the cytosol (see  
272 Appendix 1). Based on these models, we investigated the effect of spontaneous MinE  
273 binding. This effect is characterized by the quantity,  $c_{e,0}$ , which demonstrates the  
274 concentration of MinE on the membrane in the absence of MinD. To our knowledge, all

275 the previous models lack this effect, that is, MinE was assumed to be in the cytosol without  
276 the presence of MinD ( $c_e = 0$  when  $D_0 = 0$ ). This is because MinE in the absence of  
277 MinD fails to localize to the peripheral portion of the cell. This is in contrast with the  
278 observations of MinE binding on the membrane in the absence of MinD *in vitro* (29, 32,  
279 33), and with our experiments demonstrating that MinE localization is a key factor to  
280 determine Min wave generation.

281 In both Model I and II, the concentration of MinE on the membrane becomes  $c_{e,0}$  in the  
282 absence of MinD. The rest of MinE is in the bulk of the cytosol, and therefore,  $c/m$  is given  
283 by  $(D_0 - \alpha c_{e,0}) / c_{e,0}$  (see Appendix 2). Therefore, when  $c_{e,0}$  is smaller,  $c/m$  is larger.

284 First, we confirmed numerically that the rotating wave occurs in the closed membrane  
285 when MinE localization is weak,  $c_{e,0} \sim 0$  (Video 9). The wave generation occurred when the  
286 total concentrations of MinD and MinE are comparable. We also observed that pole-to-pole  
287 oscillation occurs near the boundary between stationary state and rotating wave in the phase  
288 diagram of the two concentrations. The wave generation on the planar membrane was also  
289 observed for weak MinE localization, consistent with previous studies (30, 34).

290 Then, we studied the effect of spontaneous MinE localization on wave emergence using  
291 numerical simulations and linear stability analysis (see Methods). Figure 5 shows numerical  
292 results of the amplitude of the wave for the closed membrane in our models (red points for  
293 Model II and light red points for Model I). Irrespective to these models, the wave  
294 disappeared and the concentrations of MinD and MinE were uniform on the membrane  
295 when MinE localization is strong  $c_{e,0} \gg 0$ . The condition of the wave generation may also  
296 be evaluated by linear stability analysis of the stationary state. In Figure 5, we showed by  
297 the (dark) shaded area the region at which the stationary state is linearly unstable. In this  
298 area, Min waves occurred. Both the numerical results and linear stability analysis provided  
299 evidence that above  $c_{e,0} = 0.03$  the Min wave disappears.

300 Consistent with our experimental results, numerical simulations indicated that the  
301 degree of spontaneous MinE binding shifts the conditions for Min wave emergence (Figure  
302 5). We also performed the same analysis for the planar membrane. The linear stability  
303 analysis (light shaded area) in Figure 5 showed that the critical concentration of MinE  
304 localization is higher in the planar membrane. Furthermore, the numerical results illustrated  
305 an even larger shift of the transition point, as shown in blue points in Figure 5. These results  
306 suggested that the condition is dependent on the size of the membrane; under confinement,  
307 the shift is sufficiently strong to eliminate wave generation at stronger MinE localization.  
308 On the other hand, wave generation of the planar membrane was less suppressed, and thus,  
309 it remained at stronger MinE localization on the membrane.

### 310 ***Theoretical analysis reveals that confinement regulates Min wave emergence***

311 To investigate the effect of confinement, we studied the two models introduced above  
312 (Model I and II). We used these two models because they incorporate the two effects  
313 (persistent MinE membrane binding and transformation from ADP-MinD to ATP-MinD in  
314 cytosol), which were assumed to play essential roles in the wave generation, but have been  
315 studied separately. We found that in the closed geometry, these two models reproduce the  
316 same results, suggesting that under confinement the difference between the models is not  
317 important.  
318



319 Figure 6A shows the phase diagram of the wave generation in the total MinD and MinE  
320 concentrations according to the linear stability analysis of Model II. The MinE wave  
321 occurred when both the concentrations were above the values at the phase boundary for the  
322 first mode ( $l = 1$ ). The condition of the stability of the stationary state is dependent on the  
323 spatially inhomogeneous modes. The mode number is denoted by  $l$ . The zeroth mode  
324 ( $l = 0$ ) expressed uniform concentration on the membrane whereas the first mode ( $l = 1$ )  
325 expresses inhomogeneous distribution with one wavelength on the membrane (see the inset  
326 in Figure 6A). The homogeneous oscillation ( $l = 0$ ), in which the concentrations of MinD  
327 and MinE are uniform on the membrane but oscillate in time, occurs at another phase  
328 boundary shown in Figure 6A. The phase boundary of the homogeneous oscillation  
329 requires higher concentrations than that of the Min wave, resulting in wave generation  
330 rather than uniform oscillation in the closed membrane. This behavior is not obvious in  
331 reaction diffusion systems. For any two-variable reaction-diffusion equations, it can be  
332 shown that uniform oscillation occurs rather than the wave of the first mode (35). In our  
333 models, wave generation did occur by additional degrees of freedom.

334 To investigate theoretically the mechanism of suppression of the uniform oscillation  
335 resulting in inhomogeneous wave generation, we considered the generic frame work to  
336 combine the two models outlined in Appendix 4. Our method enabled us to eliminate the  
337 bulk cytosol concentration field. The condition of the wave generation was identified by  
338 the real part of the largest eigenvalue  $\text{Re } \sigma > 0$ , where the eigenvalues,  $\sigma$ , were then  
339 obtained by solving the following equation:

$$\det(\Lambda_l^{(0)} + \Gamma \cdot \mathbf{M} - \sigma \mathbf{I}) = 0 \quad (1)$$

341 All the terms in the determinant are  $n \times n$  matrices under  $n$  concentration fields on the  
342 membrane. The first term describes the reaction on the membrane whereas the second term  
343 expressed the effect of bulk cytosol. Here,  $\mathbf{I}$  denotes the  $n \times n$  identity matrix and  $\Gamma$  shows  
344 the coupling of the reactions on the membrane with the bulk cytosol concentrations close to  
345 the membrane (see Appendix 4). The effect of confinement in  $\mathbf{M}$  appears from its  
346 dependence on the size of the system, such as the radius  $R$  of sphere or the height  $H$  of the  
347 bulk on the planar membrane. Figure 6B shows the real part of the largest eigenvalue for the  
348 closed membrane as a function of the number of modes. The eigenvalue is positive only at  
349 the first mode, suggesting that wave instability occurs instead of uniform oscillation. This  
350 result is independent of choice of Model I or II, and furthermore independent of the  
351 saturation term (see Appendix 3).

352 From the theoretical analysis, we were able to identify three effects of confinement: (i)  
353 The homogeneous stationary solution is dependent on the system size through  $\alpha$ , (ii) the  
354 diffusion on the membrane inhibits higher-mode (smaller length scale) inhomogeneity (see  
355 Eq.(32)), and (iii) the effect of the dynamics of the bulk concentrations in Eq.(3) modifies  
356 the stability. Among the three contributions, the second one is easily computed once we  
357 know the eigenvalues at the zero mode for the matrix

$$\Lambda_l^{(0)} = \Lambda_{l=0}^{(0)} - \frac{l(l+1)}{R^2} \mathbf{I} \quad (2)$$

359 In Figure 6B, this is demonstrated by the solid lines for each model (see also Figure 6—  
360 figure supplement 1). It is evident that the stability at the higher modes is dominated by this  
361 effect. On the other hand, the eigenvalue at the zero mode is deviated from the lines. This  
362 result is explained by the effect of (i) and (iii), suggesting that the mechanism of the wave  
363 instability is oscillatory instability at the first mode ( $l = 1$ ) with suppression of instability at  
364 the zero mode ( $l = 0$ ) due to the effect of confinement.

To see more details about the effect of confinement, we investigated the second term in Eq.(1)(Figure 7). For the spherical membrane (Figure 7A), the effect of confinement is given by

$$M_{ij} = \frac{\hat{\xi}_j(\sigma)}{D} \left( p_{ij} + \sigma q_{ij} + \frac{l(l+1)}{R^2} r_{ij} \right) \frac{i_l(R / \hat{\xi}_j(\sigma))}{i'_l(R / \hat{\xi}_j(\sigma))} \quad (3)$$

where

$$\hat{\xi}_j(\sigma) = \sqrt{\frac{D}{\sigma + \lambda}} \quad (4)$$

and  $i_l(x)$  is  $l$ -th-order of the modified spherical Bessel function of the first kind and  $i'_l(x) = di_l(x)/dx$ . This effect is significantly different from the planar membrane (Figure 7B), in which the effect of bulk is expressed by

$$M_{ij} = \frac{\xi_j(\sigma)}{D} \left( p_{ij} + \sigma q_{ij} + \frac{l(l+1)}{R^2} r_{ij} \right) \frac{\cosh(H / \xi_j(\sigma))}{\sinh(H / \xi_j(\sigma))} \quad (5)$$

where the length scale  $\xi$  is expressed by the eigenvalue,  $\sigma$ , and wave number,  $k = |\mathbf{k}|$ , in (10) as

$$\frac{1}{\hat{\xi}_l(\sigma)} = \sqrt{k^2 + \frac{\sigma + \lambda_l}{D}} \quad (6)$$

The magnitude of this effect is represented by  $i_l(R / \hat{\xi}) / i'_l(R / \hat{\xi})$  for the closed membrane and  $\cosh(H / \hat{\xi}) / \sinh(H / \hat{\xi})$  for the planar membrane, both of which are shown in Figure 7C and D. As the size  $R$  and  $H$  decreases, the effect becomes stronger for the zero mode of the spherical membrane and for all the wave numbers of the planar membrane. This result is in contrast with the higher modes ( $l \geq 1$ ) of the spherical membrane. Thus, for a small system, the effect of the dynamics of bulk remains only for the zeroth mode of the spherical membrane. The physical picture of this result is that, an inhomogeneous concentration associated with the higher-order modes is suppressed in a small system, while in the planar membrane, inhomogeneity in the plane may exist independently from the direction perpendicular to the membrane.

### ***Excitability may occur in the planar membrane***

Our numerical simulations suggested that the robustness against MinE localization is stronger than the prediction by the linear stability analysis (Figure 5). One possible reason is that the wave generation is dependent on initial perturbation of the concentration fields due to the excitability of the system. The homogeneous stationary state is linearly stable but responds largely against finite perturbation (Figure 8). In fact, the instability of the planar membrane starts from a core of wave emergence rather than uniform oscillation on the planar membrane, as observed in a previous study(7).

To investigate excitability of the planar membrane under Model II, we first studied the dynamics of the concentrations of membrane-bound proteins without diffusion on the membrane; namely, the bulk concentration was one dimension, and the membrane concentration was zero dimension. At  $c_{e,0} = 0.07$  in which the homogeneous stationary state was linearly stable, an initial condition of  $c_d$  was shifted from the value at the stationary state  $(c_d^*, c_{de}^*, c_e^*) = (0.0105, 0.0750, 0.0708)$  while  $c_{de}(t=0) = c_{de}^*$  and  $c_e(t=0) = c_e^*$ . When

403 the deviation,  $\delta c_d = c_d(t=0) - c_d^*$ , was small, the system quickly returns to the stationary  
404 state. When  $\delta c_d > 0.075$ , the system initially went away from the stationary state and  
405 exhibited a completely different trajectory (Figure 8A and B). This behavior suggests that  
406 the system is excitable, in which the system is stable against a small perturbation but  
407 responds largely against a perturbation above a particular threshold. In contrast with the  
408 planar membrane, the closed membrane did not show excitability (Figure 8B), and the  
409 system quickly relaxed to its stationary state without travelling in a large path. It is known  
410 that excitable systems may exhibit dissipative solitary pulses propagating in one direction  
411 with fixed speed, and spiral and turbulent waves in two dimensions (36, 37). In fact, Model  
412 II demonstrated a propagating solitary wave when the initial condition was chosen  
413 appropriately in one- (Figure 8C) and two-dimensional (Figure 8D) membranes. A spiral  
414 wave was obtained by cutting a solitary band in the two-dimensional membrane (Figure  
415 8D), a phenomenon which has also been observed in other excitable systems (38).  
416

### 417 *Early stage of Min wave emergence in microdroplets*

418 Finally, we analyzed the early stage of Min wave emergence in micro-sized space (Figure 9,  
419 Video 10). In the case of small microdroplets that only show a single wave inside, time-  
420 lapse imaging of Min proteins showed that pulsing between cytosolic parts and membrane  
421 surface is the initial stage of Min wave emergence, similar to a previous report(12).  
422 However, our imaging demonstrated that the pulsing pattern transforms to pole-to-pole  
423 oscillation, and then, settles in traveling waves. This transition of wave patterns is not  
424 specific to wet experiments but can be recapitulated by our computational simulation  
425 (Figure 9, Video 9). Introduction or reduction of stochastic noises to the simulation did not  
426 change the results, indicating that this transition proceeds in a deterministic manner;  
427 namely, wave instability underlying reaction-diffusion coupling is the only driving force to  
428 lead to the emergence of Min waves in cell-sized space, showing the specificity of the wave  
429 emergence mechanism in such space.

## 430 **Discussion**

431  
432  
433 Conditions for Min wave appearance have been regarded as the same between open systems  
434 such as on 2D planar membranes and closed geometry as in fully confined cell-sized space.  
435 In this study, we show that the conditions for Min wave appearance are limited in cell-sized  
436 closed space as compared with the case of on a 2D planar membrane. From experiments and  
437 simulation, it has been shown that the rate of spontaneous localization of MinE is an  
438 important factor to determine generation of Min waves in cell-sized closed space.  
439

440 Due to the large surface-area-to-volume in the cell-sized space, even for weak interactions,  
441 localization to the membrane becomes prominent compared to the flat membrane system.  
442 Spontaneous localization of MinE on membranes works in an inhibitory manner with  
443 respect to the generation of Min waves, but it is suppressed in the presence of a protein  
444 crowder such as BSA or cell extract to generate Min waves. This effect is observed at a  
445 relatively low concentration (1–10 mg/mL) than the case of crowding cytoplasm in living  
446 cells (100–300 mg/mL) and is not observed with synthetic polymers such as PEG8000 and  
447 Ficoll70. Hence, BSA and cell extract are considered to modify the interaction between  
448 MinE and membranes, and the mechanism is different from the effect known as crowding,  
449 such as increasing viscosity.  
450



451 Because a previous report has indicated that BSA at high concentration (>10mg/mL)  
452 attaches to the lipid membrane(39), and several proteins in cell extract are assumed to  
453 interact with such membranes, a plausible explanation of the effect of the protein crowders  
454 is competitive inhibition. To match this assumption, tuning lipids conditions to reduce  
455 spontaneous MinE attachment on membranes (Figure 3F) seems to be important for  
456 generation of Min waves without aid by auxiliary molecules, as reported previously (12,  
457 15). Although estimation of the exact strength of interaction between MinE and membranes  
458 in cell-sized space is important for understanding the details of spontaneous membrane  
459 binding of MinE, we failed to do that due to the technical difficulties associated with the  
460 measurement. However, the level is assumed to be weak from a previous study using 2D  
461 planar membranes (1/100 of the strength of MinD binding) (33).

462  
463 Another possibility to suppress the membrane attachment of MinE on membranes is  
464 regulation of the open-closed equilibrium state by excluded volume or other effects. This  
465 point will be clarified by analyzing the open-closed equilibrium state of MinE in a similar  
466 manner to that for a previous study (29) in the presence of protein crowders.

467  
468 We should note that the levels of spontaneous localization of MinE is not the only  
469 determinant factor of Min wave generation. In the I74M mutant, high concentrations of  
470 BSA suppress the spontaneous localization of MinE, but no Min waves were observed.  
471 Because I74M mutation is assumed to fix the open state of MinE, other parameters in  
472 reaction kinetics should change. As a result, the generation of Min waves is suppressed. In  
473 fact, I74M mutants do not reproduce Min waves even in living cells (29). The effects of  
474 MinE conformation shifts should be clarified in the future by analysis using various MinE  
475 mutants. However, it is plausible that spontaneous localization of MinE to the membrane is  
476 a direct regulator of Min waves in cell size spaces, as demonstrated in this study.

477  
478 Our computational simulations showed that the condition for Min wave emergence depends  
479 on membrane MinE accumulation and membrane size (Figure 5). Cell-sized space stabilized  
480 homogenous state (Figure 6), and therefore, Min waves, oscillation inhomogeneous in  
481 space, emerge instead of homogeneous oscillation. In contrast, for the flat membrane, the  
482 wave robustly appears against the increase of the spontaneous MinE binding. Our  
483 simulation suggested that this robustness is originated from the coupling between  
484 membrane and bulk dynamics, and the excitability of the system. If the system is excitable,  
485 the homogeneous stationary state is linearly stable, but responds largely against finite  
486 perturbation (Figure 8). Although our simulation suggests that the effects by excitability is  
487 stronger than space size effects, it is still elusive whether or not the excitability shown by  
488 this Min wave is model independent. This question would be clarified by investigation of  
489 the wave generation under controlled initial conditions in further experiments.

490  
491 Recent *in vitro* reconstitution studies have demonstrated that biosystems in cell-sized space  
492 show characteristic features of those biosystems not found in test tubes. For example, cell-  
493 sized space enhances formation of the actomyosin ring (40), affects aqueous phase  
494 separation (16, 41), and confers scaling properties of spindle shapes (42). Although these  
495 studies have determined that space size is a cue to change the behaviors of biosystems,  
496 biochemical parameters and mechanisms underlying their behavior have been assumed to  
497 be equal irrespective of space sizes. Our present study provides evidence that cell-sized  
498 space shifts the equilibrium of membrane binding of proteins, and changes conditions for  
499 generation and stability of iRD waves from those in 2D planer membranes. As theoretical  
500 analysis of Min wave behaviors have indicated, the control of generation and stability by  
cell-sized confinement are expected to be universal features among iRD waves.

501 Furthermore, equilibrium shifts of protein localization by surface-to-volume effects should  
502 be universal among biosystems because maximum attachment levels and total amounts of  
503 the factor explained the shift. These points will be elucidated by *in vitro* reconstitution of  
504 other iRD systems (1-4).  
505

## 506 **Materials and Methods**

### 507 ***Expression and purification of MinD and its mutant***

508  
509 In this study, all *Escherichia coli* cells were cultivated in LB medium. To construct  
510 pET15b-MinD, MinD gene was cloned from *E. coli* MG1655 genome by PCR into pET15b  
511 (Merck Millipore, Billerica, MA, USA) by Gibson assembly (New England Biolabs,  
512 Ipswich, MA, USA). To construct pET15-sfGFP-minD, sfGFP gene amplified from pET29-  
513 sfGFP (43) by PCR were cloned into N-terminal of MinD by Gibson assembly. To construct  
514 pET15-sfGFP-MinD<sup>D40A</sup>Δ10, D40A mutation and deletion of C-terminal 10 amino acids  
515 were introduced into pET15-sfGFP-minD by using the PrimeSTAR Max mutagenesis  
516 protocol (TaKaRa, Shiga, Japan). Similarly, K11A mutation was introduced into pET15-  
517 sfGFP-minD to construct pET15-sfGFP-MinD<sup>K11A</sup>. *E. coli* BL21-CodonPlus(DE3)-RIPL  
518 (Agilent Technologies, Santa Clara, CA, USA) cells were transformed with the resultant  
519 plasmids.  
520

521 Proteins were expressed by 1 mM IPTG at OD<sub>600</sub>=0.1-0.2 and further cultivation at 37°C  
522 for 3 to 4 h. The cells were collected by centrifugation and suspended in LS buffer [50 mM  
523 NaH<sub>2</sub>PO<sub>4</sub> (pH 7.6), 300 mM NaCl, 10 mM imidazole, 10 mM dithiothreitol (DTT), 0.1 mM  
524 phenylmethylsulfonyl fluoride (PMSF)] with 0.2 mM ADP-Mg. The collected cells were  
525 disrupted by sonication using a Sonifier250 (Branson, Danbury, CT, USA), and the  
526 supernatant of the crude extract was fractionated by centrifugation at 20,000g at 4°C for 30  
527 min. To purify His-tagged proteins, the crude extracts mixed with cOmplete His-Tag  
528 purification resin (Roche, Basel, Switzerland) were loaded onto a polyrep chromatography  
529 column (Bio-Rad, Hercules, CA, USA), and washed with 25 mL WS buffer [50 mM  
530 NaH<sub>2</sub>PO<sub>4</sub> (pH 7.6), 300 mM NaCl, 20 mM imidazole, 10% glycerol, 0.1 mM EDTA, and  
531 0.1 mM PMSF]. His-tagged proteins were eluted with EL buffer [50 mM NaH<sub>2</sub>PO<sub>4</sub> (pH  
532 7.6), 300 mM NaCl, 250 mM imidazole, 10% glycerol, 0.1 mM EDTA, and 0.1 mM  
533 PMSF]. EL buffer was exchanged with storage buffer [50 mM HEPES-KOH (pH 7.6), 150  
534 mM GluK, 10% glycerol, 0.1 mM EDTA] with 0.2 mM ADP-Mg by ultrafiltration using  
535 AmiconUltra-15 10k and AmiconUltra-0.5 30k filters (Merck Millipore).  
536

537 For pull-down assay, His-sfGFP-MinD<sup>D40A</sup>Δ10 was treated with thrombin (Wako, Osaka  
538 Japan) in the storage buffer at 4°C overnight. Then, the cleaved His-Tag (2kDa) was  
539 removed from the sfGFP-MinD<sup>D40A</sup>Δ10 (55kDa) solution by ultrafiltration using  
540 AmiconUltra-0.5 50k filters (Merck Millipore). Proteins in the storage buffer were stored at  
541 -80°C. Protein purity and concentrations were estimated by Comassie Brilliant Blue (CBB)  
542 staining after separating by sodium dodecyl sulphate polyacrylamide gel electrophoresis  
543 (SDS-PAGE) and bicinchoninic acid (BCA) assay.  
544

### 545 ***Expression and purification of MinE and its mutant***

546 To construct pET29-minE-His and pET29-minE-mCherry-His, MinE and mCherry genes  
547 were amplified from the *E. coli* K12 MG1655 genome or the pET21b-RL027A (Addgene,  
548 Cambridge, MA, USA), respectively, and were cloned into pET29a (Merck Millipore) by  
549 Gibson assembly. 6xHis-tag at C-terminal of MinE or mCherry was attached by PCR. The  
I74M mutation of MinE was introduced by using pET29-MinE-mCherry and PrimeSTAR

550 Max mutagenesis protocol. *E. coli* BL21-CodonPlus(DE3) RIPL cells were transformed  
551 with the resultant plasmids.

552 Proteins were expressed by 1 mM IPTG at  $OD_{600}=0.1-0.2$  and further cultivation at 37°C  
553 for 3 to 4 h (pET29-minE-His) or at 16°C for 12h (pET29-minE-mCherry-His and its  
554 mutant). Cells were collected by centrifugation, resuspended in LS buffer, and purified  
555 using the same protocol as described for MinD. The elution fraction of MinE-mCherry-His  
556 diluted 5- to 10-fold with HG buffer [50 mM HEPES-KOH, pH 7.6, 10% glycerol, and 0.1  
557 mM EDTA] was further purified by using Hitrap Q HP column (GE Healthcare, Chicago,  
558 IL, USA) and AKTA start (GE Healthcare). Briefly, the diluted fraction was loaded onto  
559 the column equilibrated with A buffer [50 mM HEPES-KOH (pH 7.6), 50 mM NaCl, 10%  
560 glycerol, and 0.1 mM EDTA], and washed using the same buffer. Proteins were eluted by  
561 IEX protocol of AKTA start using A buffer and B buffer [50 mM HEPES-KOH (pH 7.6), 1  
562 M NaCl, 10% glycerol, and 0.1 mM EDTA]. Peak fractions monitored by SDS-PAGE were  
563 collected and exchanged with the storage buffer using AmiconUltra-15 10k and  
564 AmiconUltra-0.5 10k filters (Merck Millipore). Samples were stored at -80°C, and protein  
565 purity and concentrations were estimated by CBB staining after separating by SDS-PAGE  
566 and BCA assay. For MinE-mCherry-His proteins, concentrations were estimated by  
567 quantitative CBB staining using Fiji software (National Institutes of Health, Bethesda, MD,  
568 USA) to avoid signal contamination from mCherry absorbance.

### 569 ***Expression and purification of MinC-sfGFP***

570 MinC gene and sfGFP gene were amplified and cloned into the pET15b vector by the same  
571 procedure for MinD. *E. coli* BL21-CodonPlus(DE3)-RIPL cells were transformed with the  
572 resultant plasmid. IPTG was added at  $OD_{600}=0.1-0.2$  to 1 mM, and cells were further  
573 cultivated at 16°C overnight. The protocol for purification, storage, quantification of MinC-  
574 sfGFP was the same as for MinD except no ADP-Mg addition.

### 575 ***Preparation of E. coli cell extract***

576 *E. coli* BL21-CodonPlus(DE3)-RIPL cells were cultured in LB medium at 37°C. Cells at  
577  $OD_{600} = 0.7$  were collected by centrifugation and suspended in LSE buffer [25 mM Tris-  
578 HCl (pH 7.6), 250 mM NaCl, and 10 mM GluMg]. Then, cells were disrupted by sonication  
579 using a Sonifier250, and the supernatant of the crude extract after centrifugation at 30,000g  
580 for 30 min at 4°C were collected as cell extract. To remove genome DNA and RNA, cell  
581 extract was incubated at 37°C for 30 min. The supernatant after centrifugation at 30,000g  
582 for 30 min at 4°C was exchanged with the RE buffer [25 mM Tris-HCl (pH 7.6), 150 mM  
583 GluK and 5 mM GluMg] using AmiconUltra-15 3k and AmiconUltra-0.5 3k filters (Merck  
584 Millipore). The sample was stored at -80°C, and protein concentration was estimated by  
585 BCA assay. Concentrations of RNA such as ribosomal RNA, tRNA, and mRNA were  
586 estimated by 260 nm absorbance. Macromolecule concentrations were determined by the  
587 summation of protein and RNA concentration (44).

### 588 ***Preparation of supported lipid bilayers (SLBs) on a mica layer***

589 The general protocol was followed according to a previous report (11). *E. coli* polar lipid  
590 extract (Avanti, Alabaster, AL, USA) in chloroform at 25 mg/mL was dried by argon gas  
591 flow. The lipid film was further dried in a desiccator for at least 30 min at room  
592 temperature, followed by resuspension in TKG150 buffer [25 mM Tris-HCl (pH 7.6) and  
593 150 mM GluK] to a lipid concentration of 5 mg/mL and then gentle hydration at 23°C for  
594 at least 1 h. The lipid solution was then vortexed for 1 min and sonicated using a  
595 Sonifier250 for 10 min to 15 min (Duty10%, Output1) to obtain small unilamellar vesicles  
596 (SUVs). SUV solution was diluted to 2 mg/mL with TKG150 buffer, and CaCl<sub>2</sub> was added  
597

600 to a final concentration of 0.1 mM. This solution was applied to a thin mica layer mounted  
601 on the bottom of a glass base dish (Iwaki, Tokyo, Japan). After a 1-h incubation at 37°C,  
602 excess SUVs were washed with RE buffer.

### 603 ***Self-organization assay for Min proteins on SLBs***

604 For the self-organization assay, a reaction mixture containing 2.5 mM ATP, 1 μM His-  
605 sfGFP-MinD, and 1 μM MinE-mCherry-His in RE buffer was added to the SLBs, followed  
606 by incubation at room temperature for 10 min prior to microscopic observation. Self-  
607 organization of Min proteins was observed using a fluorescent microscope (Axiovert 200M;  
608 Carl Zeiss, Jena, Germany) with a CMOS camera using an ORCA-Flash4.0 V2  
609 (Hamamatsu Photonics, Shizuoka, Japan) or a confocal laser-scanning microscope FV1000  
610 (Olympus, Tokyo, Japan).  
611

### 612 ***Self-organization assay inside lipid droplets***

613 The general protocol for microdroplets preparation was followed according to a previous  
614 report (22). *E. coli* polar lipid extract (Avanti) in chloroform at 25 mg/mL was dried by  
615 argon gas flow and dissolved with mineral oil (Nacalai Tesque, Kyoto, Japan) to 1 mg/mL  
616 in glass tubes. The lipid mixture was then sonicated for 90 min at 60°C using Branson  
617 (Branson). For preparation of the modified lipid mixture, 15% of 10 mg/mL *E. coli*  
618 Cardiolipin (CA) (Avanti) and 85% of 10 mg/mL 1,2-dioleoyl-sn-glycero-3-  
619 phosphocholine (DOPC) (Avanti) dissolved in chloroform were mixed and microdroplets  
620 were prepared as the same way for *E. coli* polar lipid extract. For the self-organization  
621 assay, the reaction mixture consisted of 1.0 μM His-sfGFP-MinD, 1.0 μM MinE-mCherry-  
622 His, 2.5 mM ATP, and macromolecules [BSA of Cohn Fraction V (A6003, Sigma-Aldrich,  
623 St. Louis, MO, USA), *E. coli* cell extract, Ficoll70 (Santa Cruz Biotechnology, Dallas, TX,  
624 USA), or PEG8000 (Promega, Madison, WI, USA) in RE buffer]. Concentrations of BSA  
625 and *E. coli* cell extract were varied to evaluate the concentration dependence of Min waves.  
626 To avoid depletion of ATP due to endogenous enzymes in *E. coli* cell extract, 80 mM  
627 creatine phosphate and 0.4 mg/mL creatine kinase were added for the assay using cell  
628 extract. The reaction mixture (2 μL) was added to the lipid mixture (100 μL), and lipids  
629 microdroplets were obtained by emulsification with tapping. A portion of the mixture (15  
630 μL) was gently placed into two glass coverslip slits with a double-sided tape as spacers.  
631 Self-organization of Min proteins inside the droplets was observed using the same  
632 equipment described for SLBs.  
633

### 634 ***Diffusion analysis***

635 For analysis of diffusion of sfGFP in cytosolic parts and His-sfGFP-MinD on membranes in  
636 BSA solution entrapped inside microdroplets covered with *E. coli* polar lipids, a confocal  
637 laser-scanning microscope was used (FV1200; Olympus). The diffusion coefficient of  
638 sfGFP in 0 mg/mL, 50 mg/mL, 100 mg/mL, 200 mg/mL, and 300 mg/mL of BSA in RE  
639 buffer was measured by the standard protocol for Fluorescence Correlation Spectroscopy of  
640 FV1200. Diffusion coefficients of His-sfGFP-MinD on membranes in 0 mg/mL and 100  
641 mg/mL of BSA in RE buffer was measured by Fluorescence Recovery After Photo-  
642 bleaching (FRAP) using tornado bleaching of circle area with ~1 μm diameter. The recovery  
643 intensity as a function of time was converted to diffusion coefficients by using the FRAP  
644 protocol of FV1200.  
645

### 646 ***Pull-down assay***

647 The mixture of 9 μM MinE-mCherry-His, 3 μM His-sfGFP-MinD, or 6 μM its mutant  
648 treated by thrombin (MinD<sup>D40A</sup>Δ10), and 3 μM BSA were applied to cComplete His-Tag  
649



650 purification resin and incubated in RE buffer for 30 min at room temperature. Each mixture  
651 with resin was loaded into Micro Bio-Spin chromatography columns (Bio-Rad). Then, flow  
652 thorough fraction was separated and collected by a tabletop centrifuge. After washing the  
653 resin by 500  $\mu$ L RE buffer with 20 mM imidazole for 3-5 times, elution fraction was  
654 obtained by 50  $\mu$ L RE buffer with 250 mM imidazole. Proteins in each fraction were  
655 separated by SDS-PAGE and visualized by CBB staining.

### 656 **Evaluation of *c/m* ratio**

657 Preparation of lipid droplets and glass coverslips for observation were performed using the  
658 same procedure as self-organization assay inside lipid droplets. To analyze localization  
659 (*c/m*) of MinE, various concentrations of MinE-mCherry-His (WT or I74M mutant) were  
660 mixed with BSA. For the analysis using *E. coli* cell extract, Ficoll70 (Santa Cruz  
661 Biotechnology, Dallas, TX, USA), or PEG8000 (Promega, Madison, WI, USA), 1  $\mu$ M  
662 MinE-mCherry-His was used. Then, the mixture was entrapped inside microdroplets of *E.*  
663 *coli* polar lipids. To analyze localization of other proteins, 1  $\mu$ M sfGFP-MinD with or  
664 without 50 mg/mL BSA, 1  $\mu$ M sfGFP, or 1  $\mu$ M BSA-FITC (Thermo Fisher Scientific,  
665 Waltham, MA, USA) with 1 mg/mL BSA were used. Membrane localization of each  
666 protein was observed using a confocal laser-scanning microscope FV1000 (Olympus). All  
667 analyses of obtained images were carried out using Fiji software. A center line of a droplet  
668 was manually drawn, and then, the intensity in each pixels of the line were obtained. The  
669 membrane intensities (*m*) were determined as the higher intensity of two membrane edge  
670 peaks. The cytosol intensities (*c*) were determined as the average intensity of 10 pixels  
671 around the pixel at the center position between two edge peaks. To evaluate the effects of  
672 macromolecules (Ficoll70, and PEG8000) and the modified lipid condition (85% of DOPC  
673 and 15% cardiolipin) in Figure 3F, *c/m* ratio was determined as the average from 10  
674 individual droplets with 10-30  $\mu$ m in a diameter.  
675

### 676 **Numerical simulations**

677 The partial differential equations in Model I (Eqs. (12)-(16)) and Model II (Eqs. (19)-  
678 (24)) were solved either using the commercial software of the Finite Element method,  
679 COMSOL, or using custom codes of the pseudo-spectral method in the spherical  
680 coordinates ( $r, \theta, \varphi$ ) for the closed membrane and Cartesian coordinates ( $x, y, z$ ) for the  
681 planar membrane. Both methods reproduce waves in the planar membrane as well as waves  
682 in the closed membrane. In the pseudo-spectral method for the closed membrane of a  
683 spherical shape, all the concentration fields in bulks such as  $c_D$  and on a membrane such as  
684  $c_d$  are expanded in terms of spherical harmonics,  $Y_l^m(\theta, \varphi)$  :

$$685 c_D(r, \theta, \varphi, t) = \sum_{l=0}^{l_{\max}} \sum_{m=-l}^l c_{D,lm}(r, t) Y_l^m(\theta, \varphi) \quad (7)$$

$$686 c_d(\theta, \varphi, t) = \sum_{l=0}^{l_{\max}} \sum_{m=-l}^l c_{d,lm}(t) Y_l^m(\theta, \varphi) \quad (8)$$

687 The model was then translated into a set of ordinary differential equations to obtain  
688 membrane concentrations ( $c_d, c_{de}, c_e$ ) and one-dimensional partial differential equations  
689 (time,  $t$ , and the radial direction,  $r$ ) for the bulk concentrations ( $c_D, c_E$ ). In total, we solved  
690  $(l_{\max} + 1)^2$  equations for each variable where the truncation of the mode was chosen as  
691  $l_{\max} = 16$ . The results were independent of the increase in the value.

692 Inhomogeneity of the concentration field on the membrane was expressed by the  
693 amplitude of each mode denoted by  $l$ . The amplitude is expressed by rotationally invariant  
694

695 form using the expansion coefficients in Eq.(7) with all  $m \in [-l, l]$ . For example, the  
 696 uniform distribution of MinD on the membrane was expressed by the  $l=0$  mode and its  
 697 norm  $\sqrt{c_{d,0}^2}$ , while the first mode ( $l = 1$ ) corresponds to the inhomogeneous concentration  
 698 field of a single wave, which is characterized by the norm  $\sqrt{c_{d,1,0}^2 - c_{d,1,-1}c_{d,1,1}}$ .

699 The parameters were set as  $\omega_D = 0.1$ ,  $\omega_{dD} = 5.0$ ,  $\omega_E = 0.1$ ,  $D = 100$ , and  $\omega_{ed} = 100$  in  
 700 the non-dimensional unit (see Appendix 2). If we choose  $\omega_e = 0.2$  [1/sec],  
 701  $D_d = 0.2$  [ $\mu\text{m}^2/\text{sec}$ ], and the units of concentrations in cytosol and on membrane to be  
 702  $10^3$  [ $1/\mu\text{m}^3$ ] and  $10^3$  [ $1/\mu\text{m}^2$ ], respectively, then, our choice of the parameters implies  
 703  $\omega_D = 0.02$  [ $\mu\text{m}/\text{sec}$ ],  $\omega_{dD} = 10^{-3}$  [ $\mu\text{m}^3/\text{sec}$ ],  $\omega_E = 2 \times 10^{-5}$  [ $\mu\text{m}^3/\text{sec}$ ],  $D = 20$  [ $\mu\text{m}^2/\text{sec}$ ], and  
 704  $\omega_{ed} = 2 \times 10^{-2}$  [ $\mu\text{m}^2/\text{sec}$ ]. MinE localization at the membrane was modeled by the term  $c_{e,0}$ .  
 705 When BSA was added, we set smaller  $c_{e,0}$ , whereas without BSA, we set  $c_{e,0} > 0$ . Note that  
 706 when  $c_{e,0} = 0$ , all MinE molecules are in bulk  $c_e = 0$  without MinD, while the membrane is  
 707 filled by MinD, that is  $c_d = 1$ , without MinE.

708 For the planar membrane in the  $\mathbf{x} = (x, y)$  plane, the concentration fields are  
 709 expanded with the wave vector,  $\mathbf{k}$ , such as

$$710 \quad c_D(h, \mathbf{x}, t) = \int_{\mathbf{k}} c_{D,\mathbf{k}}(z, t) e^{i\mathbf{k}\cdot\mathbf{x}} \quad (9)$$

$$711 \quad c_d(\mathbf{x}, t) = \int_{\mathbf{k}} c_{d,\mathbf{k}}(t) e^{i\mathbf{k}\cdot\mathbf{x}} \quad (10)$$

712 with the wave-number-dependent expansion coefficients  $c_{d,k}(t)$  on the membrane and  
 713  $c_{D,k}(z, t)$  in the bulk cytosol. Here, the amplitude of the wave vector is denoted by the wave  
 714 number,  $k = |\mathbf{k}|$ . We may use the pseudo-spectral method, and solve the fields in the  
 715 direction of the height,  $z$ , in real space, and the fields in the direction of the plane,  $(x, y)$ ,  
 716 in Fourier space. The amplitude of a wave of MinD on the membrane is given by the  
 717 absolute value of the complex number of the expansion coefficient  $|c_{d,k}|$ .

## 718 Stability analysis of the theoretical models

719 We performed linear-stability analysis on the models. First, we calculated the  
 720 stationary uniform solutions of the equations by setting time and spatial derivatives along  
 721 the direction on the membrane to zero, and denoted these solutions by superscript “\*”.  
 722 Equations (12)-(16) and the boundary conditions [Eqs. (17) and (18)] were then linearized  
 723 around the stationary uniform solution such as  $c = c^* + \delta c$ . The eigenvalues,  $\sigma$ , are  
 724 obtained by plugging  $\delta c(t) = \delta c e^{\sigma t}$  into the linearized equations (34, 45). The partial  
 725 differential equations for the bulk dynamics were solved and the boundary conditions were  
 726 translated into linear relationship between membrane and bulk concentrations. The set of  
 727 the linearized equations for the concentration fields, for example  $\Psi = (c_d, c_{de}, c_e, c_D, c_E)$  in  
 728 Model I, is expressed by a matrix form as

$$729 \quad \sigma \mathbf{I}_s \cdot \delta \Psi = \Lambda_l \cdot \delta \Psi \quad (11)$$

730 where the  $5 \times 5$  matrix  $\Lambda_l$  has five eigenvalues depending on the mode  $l$  (but not on  $m$ ) of  
 731 spherical harmonics for the closed membrane. Here,  $\mathbf{I}_s$  show the dynamics on the  
 732 membrane and is a diagonal matrix whose diagonal elements are 1 only for the membrane  
 733  
 734

735 concentrations and 0 otherwise, for example in Model I (1,1,1,0,0). The concentration in  
736 bulk in  $\Psi$  is interpreted as the concentration near the membrane, such that  $c_D(R, \theta, \varphi)$  for  
737 the closed membrane and  $c_D(x, y, 0)$  for the planar membrane. For the planar membrane,  
738 the matrix is dependent on the wave number  $k$  and is denoted by  $\Lambda_k$ . When the real part of  
739 the eigenvalue is positive, that is  $\text{Re } \Lambda_l > 0$  for  $l \neq 0$ , the uniform state is unstable, and an  
740 inhomogeneous pattern appears. Additionally, when the imaginary part is non-zero, the  
741 frequency becomes finite and either standing or rotating waves appear. In Model II, the  
742 same analysis was performed for the concentration fields denoted by  
743  $\Psi = (c_d, c_{de}, c_e, c_{DT} + c_{DD}, c_{DD}, c_E)$  and the  $6 \times 6$  matrix  $\Lambda_l$  in Eq.(11).

## 746 Appendix

### 747 *Appendix 1 Theoretical analysis of the Min system of the closed and planar membranes*

748 Spontaneous wave generation in the experiments have been studied as wave instability,  
749 which was proposed by Alan Turing as an extension of static Turing instability (46). In  
750 contrast with the static instability realized by a minimum of two components, wave  
751 instability requires three components. Although the instability can be evaluated by the linear  
752 stability analysis, physical intuition of the wave instability is not as obvious as static Turing  
753 instability. Therefore, several mechanisms have been proposed: First, homogeneous  
754 oscillation in a two-component system is suppressed by a third component (47), second,  
755 static inhomogeneous pattern generated by two-component Turing instability becomes  
756 oscillatory due to a third component (48) and, third, oscillatory instability occurs in  
757 eigenmodes associated with conserved quantities (49). Despite these phenomenology, clear  
758 mechanism of wave generation of Min system still remains under debate due to the  
759 complexity of reaction couplings and also lack of understanding how mixture of different  
760 spatial dimensions (membrane and cytosol) plays a role. The Min systems have two  
761 representative geometry; one is the closed membrane (Figure 7A), which we focused in this  
762 study, and the second is the open planar membrane (Figure 7B). In both systems, MinD and  
763 MinE proteins are distributed on the two-dimensional membrane and in the three-  
764 dimensional bulk cytosol.

766 So far, simple and realistic computational simulations have been proposed to reveal  
767 the mechanism of Min waves. These studies are based on partial differential equations of  
768 reaction-diffusion models (14, 30, 31, 34, 49-53) or particle-based stochastic models (54-  
769 57). The stochastic model is based on the model proposed by Huang et al. (31). At the early  
770 stage of the modeling, the geometry of the Min system was neglected such that all the  
771 concentration fields, both on membrane and in bulk cytosol, were defined in the same  
772 dimensions (50, 51). Recently, the coupling between the dynamics of membrane and bulk  
773 has been investigated. Among these models, only two approaches have successfully  
774 reported reproduction of the Min wave generation both on the planar and closed membrane  
775 including the effect of Min proteins in cytosol. One is to include transformation from ADP-  
776 MinD to ATP-MinD (31), and second is to include formation of a MinDE complex from  
777 membrane-bound MinD and MinE resulting in persistent MinE membrane binding (30). In  
778 both models, the Min wave occurs in the planar membrane (30, 34). The wave on the closed  
779 membrane requires a specific initial condition, stochasticity (54), or ellipsoidal shape (53)  
780 using the model proposed by (31), whereas the wave occurs without these effects in (30).  
781 The two approaches, however, show different dependence of the stability of the waves on  
782 total MinD and MinE concentrations, and other parameters.



783  
784  
785  
786  
787  
788  
789  
790  
791  
792  
793  
794  
795  
796  
797  
798  
799  
800  
801  
802  
803  
804  
805  
806  
807  
808  
809  
810  
811  
812  
813  
814  
815  
816  
817  
818  
819  
820  
821  
822  
823  
824

## Appendix 2 Theoretical Model I

In Model I, MinD and MinE concentrations inside a spherical membrane with its radius  $R$ , or in the rectangular bulk with its height  $H$ , were denoted by  $c_D$  and  $c_E$ , respectively (see Figure 7A and B). Concentrations of MinD, MinE, and their complex (MinDE) bound to a membrane were denoted by  $c_d$ ,  $c_e$ , and  $c_{de}$ , respectively (see Fig.S7A). The total MinD and MinE concentration is denoted by  $\mathcal{D}_0 = c_D + \alpha(c_d + c_{de})$  and  $\mathcal{E}_0 = c_E + \alpha(c_{de} + c_e)$ , respectively. We denote the characteristic concentrations on the membrane and the cytosol as  $c_s$  and  $c_b$ , respectively, and we express all the concentration fields in the unit of these characteristic concentrations. Here,  $\alpha$  demonstrates an effect of confinement. Its concrete form is dependent on geometry of the system, but, in the current model for a spherical closed membrane,  $\alpha = 3c_s / (c_b R)$ . For the planar membrane, it is associated with the height  $H$  of the system as  $\alpha = c_s / (c_b H)$ .

Chemical reactions are schematically shown in Figure 5—figure supplement 1A. Each reaction shows a rate,  $\omega$ , specified by its subscript. The diffusion constants of proteins bound to the membrane were denoted by  $D_d$ ,  $D_e$ , and  $D_{de}$ , whereas bulk diffusion of unbound proteins was denoted by the diffusion constants  $D_D$  and  $D_E$ . We assumed the same diffusion constants for MinD and MinE in bulk represented by  $D$ . We also assumed the same diffusion constants for  $D_d$ ,  $D_e$ , and  $D_{de}$  on the membrane. The latter diffusion constant was chosen to be unity without loss of generality. In comparison to the original work in (30), the unbinding process was approximated as  $\omega_{de,m} = \omega_{de} \approx \omega_e$ , and  $\omega_{de,c} = 0$ .

We defined the unit time scale as  $\tau_0 = 1 / \omega_e$  and the unit length scale as  $l_0 = \sqrt{D_d / \omega_e}$ . The concentration fields on the membrane were normalized by the characteristic concentration on the membrane,  $c_s$ , which is chosen to be the maximum concentration on the membrane,  $c_{\max}$ , in the presence of the saturation effect (Model I). The model is given by the following equations (30):

### Model I

$$\partial_t c_D = D \Delta c_D \quad (12)$$

$$\partial_t c_E = D \Delta c_E \quad (13)$$

$$\partial_t c_d = \Delta_s c_d + c_D (\omega_D + \omega_{dD} c_d) (1 - c_d - c_{de}) - \omega_E c_E c_d - \omega_{ed} c_e c_d \quad (14)$$

$$\partial_t c_{de} = \Delta_s c_{de} + \omega_E c_E c_d + \omega_{ed} c_e c_d - c_{de} \quad (15)$$

$$\partial_t c_e = \Delta_s c_e + c_{de} - \omega_{ed} c_e c_d - (c_e - c_{e,0}) \quad (16)$$

Here,  $\Delta$  and  $\Delta_s$  denote the Laplacian operator in three-dimensional bulk space and the Laplace-Bertrami operator on the two-dimensional surface, respectively. The boundary conditions of Eq.(12) and Eq.(13) are

$$-D \nabla_n c_D = c_D (\omega_D + \omega_{dD} c_d) (1 - c_d - c_{de}) - c_{de} \quad (17)$$

$$-D \nabla_n c_E = \omega_E c_E c_d - (c_e - c_{e,0}) \quad (18)$$

Here,  $\nabla_n$  is the derivative along the normal direction to the membrane. In this model, the set of concentration fields is expressed by  $\Psi = (c_d, c_{de}, c_e, c_D, c_E)$  where the membrane concentration fields are  $\psi = (c_d, c_{de}, c_e)$  and the bulk concentration fields are  $\phi = (c_D, c_E)$ .

## Appendix 3 Theoretical Model II

825 The effect of ATP hydrolyzation of MinD in bulk plays an essential role in the model  
 826 proposed by Huang *et al.*(31). This model assumes MinE is in complex form of MinDE on  
 827 the membrane. In a previous report(14), the model is generalized to include the effect of  
 828 formation of MinDE complex from membrane-bound MinD and MinE. We, therefore,  
 829 considered the following model:

830 Model II

831 
$$\partial_t (c_{DT} + c_{DD}) = D\Delta (c_{DT} + c_{DD}) \quad (19)$$

832 
$$\partial_t c_{DD} = D \left( \Delta - \frac{1}{\xi^2} \right) c_{DD} \quad (20)$$

833 
$$\partial_t c_E = D\Delta c_E \quad (21)$$

834 
$$\partial_t c_d = \Delta_s c_d + c_{DT} (\omega_D + \omega_{dD} c_d) - \omega_E c_E c_d - \omega_{ed} c_e c_d \quad (22)$$

835 
$$\partial_t c_{de} = \Delta_s c_{de} + \omega_E c_E c_d + \omega_{ed} c_e c_d - c_{de} \quad (23)$$

836 
$$\partial_t c_e = \Delta_s c_e + c_{de} - \omega_{ed} c_e c_d - (c_e - c_{e,0}) \quad (24)$$

837 The length scale associated with ATP hydrolyzation is denoted by  $\xi = \sqrt{D/\lambda}$ , where  $\lambda$  is  
 838 the rate of ATP hydrolyzation. The boundary conditions of Eqs.(19)-(21) are

839 
$$-D\nabla_n (c_{DT} + c_{DD}) = c_{DT} (\omega_D + \omega_{dD} c_d) - c_{de} \quad (25)$$

840 
$$-D\nabla_n c_{DD} = -c_{de} \quad (26)$$

841 
$$-D\nabla_n c_E = \omega_E c_E c_d - (c_e - c_{e,0}) \quad (27)$$

842 Chemical reactions are schematically shown in Figure 5—figure supplement 1B. Except  
 843 ATP-hydrolyzation, this model differs from Eqs.(12)-(16) only in saturation of membrane-  
 844 bound MinD in Eqs.(22) and (25). As we show in the analysis in Figure 6B, this effect is  
 845 not relevant in closed membrane. In fact, when  $\xi \gtrsim R$ , this model reproduces similar waves  
 846 as in the model I, while when  $\xi \ll R$  and  $\omega_{ed} \ll 1$ , this model reproduce a similar standing  
 847 wave from the initial condition in which is  $c_d$  accumulated semi-sphere on the membrane  
 848 (31, 54). We use the same parameters as Model I, and the additional parameter is set to be  
 849  $\lambda = 1.0$ . In this model, it is convenient to choose the set of concentration fields to be  
 850 expressed by  $\Psi = (c_d, c_{de}, c_e, c_{DT} + c_{DD}, c_{DD}, c_E)$  where the membrane concentration fields  
 851 are  $\psi = (c_d, c_{de}, c_e)$  and the bulk concentration fields are  $\phi = (c_{DT} + c_{DD}, c_{DD}, c_E)$ .

852 **Saturation of membrane-bound proteins does not play a role in the closed membrane**

853 Model I differs from Model II in two respects. One is ATP hydrolysis in bulk proposed  
 854 by (31). The Second effect is saturation membrane-bound MinD, that is, the concentration  
 855 of MinD does not exceed a certain value (1 in our unit) which is given as a  
 856 phenomenological parameter. This term was questioned by (58), in which ATP hydrolysis  
 857 in bulk caps the concentration without this term. In order to show the saturation term is not  
 858 necessary in a small system even without ATP hydrolysis in bulk, we compare stability  
 859 analysis of Model I with and without the saturation term (Figure 6B and Figure 6—figure  
 860 supplement 1). The results show they are almost identical, and the same mechanism of wave  
 861 instability, namely suppression of instability at the zero mode, occurs in both cases. This is  
 862 because maximum concentration of MinD on the membrane is not set by the saturation term  
 863 rather by conservation law. For a larger system, this is not the case because the bulk  
 864 concentrations is insensitive to the membrane concentrations due to small  $\alpha$ .

865 **Appendix 4 Generic model and its reduction onto membrane**

In order to give a unified expression for different model (Model I and II), we investigated a generic form of these models. We considered  $n$  variables of membrane-bound proteins denoted by  $\psi$  such as  $\psi = (c_d, c_{de}, \dots)$ , and  $m$  variables of bulk cytosol concentrations denoted by  $\phi$  such as  $\phi = (c_{DD}, c_E, \dots)$ . The dynamics in bulk is expressed by linear equations such as

$$\partial_t \phi_i = (D\Delta - \lambda_i) \phi_i \quad (28)$$

The subscript denoted a specific concentration of a protein in bulk cytosol. The dynamics of the membrane concentrations is formally written as

$$\partial_t \psi_i = F_i \left[ \left\{ \psi_p \right\}_{p \in [1, n]}, \left\{ \phi_q \right\}_{q \in [1, m]} \right] + \Delta_s \psi_i \quad (29)$$

where the first term in the right-hand side expresses biochemical reactions. The boundary conditions are, in general, nonlinear, but they are rewritten as

$$D\nabla_n \phi_i = p_{ij} \psi_j + q_{ij} \partial_t \psi_j - r_{ij} \Delta_s \psi_j \quad (30)$$

The matrices,  $\mathbf{p}$ ,  $\mathbf{q}$ , and  $\mathbf{r}$ , are specified by each model. Homogeneous stationary solution is obtain by  $F_i[\psi^*, \phi^*] = 0$  together with conservation law of MinD and MinE.

The concentration fields in the linearized equation are expanded with spherical harmonics Eq.(8) for the closed membrane or with wave vectors  $\mathbf{k}$  Eq.(10) for the planar membrane. Using the eigenvalues, the concentration fields are expressed as  $\psi(t) = \psi^* + \delta\psi e^{\sigma t}$  on the membrane and  $\phi(t) = \phi^* + \delta\phi e^{\sigma t}$  in bulk. We can solve Eq.(28) together with the boundary conditions Eq.(30). Then the linearized equation on the membrane is expressed as

$$\sigma \delta\psi_{lm,i} = \sum_{j=1}^n \Lambda_{l,ij}^{(0)} \delta\psi_{lm,j} + \sum_{j=1}^m \Gamma_{ij} \delta\phi_{lm,j}(R) \quad (31)$$

where the  $n \times n$  matrix  $\Lambda_l^{(0)}$  is expressed by

$$\Lambda_{l,ij}^{(0)} = \frac{\partial F_i}{\partial \psi_j} \Big|_{\psi=\psi^*, \phi=\phi^*} - \frac{l(l+1)}{R^2} \delta_{ij} \quad (32)$$

And the coupling between membrane and bulk dynamics is expressed by  $n \times m$  matrix  $\Gamma$  as

$$\Gamma_{ij} = \frac{\partial F_i}{\partial \phi_j} \Big|_{\psi=\psi^*, \phi=\phi^*} \quad (33)$$

For the planar membrane, the wave-number-dependent concentrations  $\phi_k$  and  $\psi_k$  were considered, and  $\Lambda_l^{(0)}$  and  $l(l+1)/R^2$  were replaced by  $\Lambda_k^{(0)}$  and  $k^2$ , respectively. To obtain the eigenvalues, we solved the equation in which the determinant of the linear matrix in Eq.(31) vanished (see Eq.(1)). This is similar to Eq.(11), but it has a  $(n+m) \times (n+m)$  matrix. The current form has only a  $n \times n$  matrix, which makes the effect of confinement clearer as shown in Eq. (1).

Because there are two conserved quantities of this system, total MinD and MinE concentrations, there are two zero eigenvalues (zero eigenmodes) associated with them. Except these eigenvalues, the bottom-right block of the matrix  $\Lambda_l$  associated with bulk concentrations is invertible, and thus, we may eliminate the bulk concentrations by solving the linearized equations. This argument assumes that wave instability does not occur by the eigenvalues at the finite modes connected to the zero eigenmodes. This is the case in the models studied here, and the results in (34) for the planar membrane with the model

906 proposed by (31) also demonstrate that the instability at a finite wavenumber is not  
907 connected to the zero eigenmodes.

## 908 909 910 **Supplementary Materials**

911 Video 1. Behaviors of Min proteins entrapped in microdroplets

912 Video 2. Wave propagation of Min proteins in microdroplets with a lipid mixture (85%  
913 DOPC and 15% Cardiolipin)

914 Video 3. Wave propagation of Min proteins in microdroplets containing 100 mg/mL BSA

915 Video 4. Behaviors of Min proteins entrapped in microdroplets containing 100 mg/mL  
916 PEG8000

917 Video 5. Behaviors of Min proteins entrapped in microdroplets containing 100 mg/mL  
918 Ficoll70

919 Video 6. Wave propagation of non-tagged MinD tracked by sfGFP-MinC in microdroplets  
920 containing 100 mg/mL BSA

921 Video 7. Wave propagation of Min proteins in microdroplets containing 16 mg/mL  
922 macromolecules in cell extract

923 Video 8. Behaviors of sfGFP-MinD and MinEI74M-mCherry entrapped in microdroplets  
924 containing 50 mg/mL BSA

925 Video 9. Time development at initial stages of MinD single waves in lipids droplets using  
926 Model I (simulation)

927 Video 10. Time development at initial stages of MinD single waves in lipids droplets  
928 (experiment)

## 929 930 931 932 **References**

- 933 1. Adachi S, Hori K, & Hiraga S (2006) Subcellular positioning of F plasmid mediated by  
934 dynamic localization of SopA and SopB. *J Mol Biol* 356(4):850-863.
- 935 2. Arai Y, *et al.* (2010) Self-organization of the phosphatidylinositol lipids signaling system  
936 for random cell migration. *Proc Natl Acad Sci USA* 107(27):12399-12404.
- 937 3. Huang CH, Tang M, Shi C, Iglesias PA, & Devreotes PN (2013) An excitable signal  
938 integrator couples to an idling cytoskeletal oscillator to drive cell migration. *Nat Cell Biol*  
939 15(11):1307-1316.
- 940 4. Goryachev AB & Pokhilko AV (2008) Dynamics of Cdc42 network embodies a Turing-  
941 type mechanism of yeast cell polarity. *FEBS Lett* 582(10):1437-1443.
- 942 5. Rothfield L, Taghbalout A, & Shih YL (2005) Spatial control of bacterial division-site  
943 placement. *Nat Rev Microbiol* 3(12):959-968.
- 944 6. Rowlett VW & Margolin W (2013) The bacterial Min system. *Curr Biol* 23(13):R553-  
945 556.
- 946 7. Loose M, Fischer-Friedrich E, Ries J, Kruse K, & Schwille P (2008) Spatial regulators for  
947 bacterial cell division self-organize into surface waves in vitro. *Science* 320(5877):789-  
948 792.
- 949 8. Loose M, Fischer-Friedrich E, Herold C, Kruse K, & Schwille P (2011) Min protein  
950 patterns emerge from rapid rebinding and membrane interaction of MinE. *Nat Struct Mol*  
951 *Biol* 18(5):577-583.
- 952 9. Martos A, Petrusek Z, & Schwille P (2013) Propagation of MinCDE waves on free-  
953 standing membranes. *Environ Microbiol* 15(12):3319-3326.

- 954 10. Zieske K & Schwille P (2013) Reconstitution of pole-to-pole oscillations of min proteins  
955 in microengineered polydimethylsiloxane compartments. *Angew Chem Int Ed* 52(1):459-  
956 462.
- 957 11. Vecchiarelli AG, Li M, Mizuuchi M, & Mizuuchi K (2014) Differential affinities of MinD  
958 and MinE to anionic phospholipid influence Min patterning dynamics in vitro. *Mol*  
959 *Microbiol* 93(3):453-463.
- 960 12. Zieske K, Chwastek G, & Schwille P (2016) Protein patterns and oscillations on lipid  
961 monolayers and in microdroplets. *Angew Chem Int Ed.* 55(43):13455-13459
- 962 13. Caspi Y & Dekker C (2016) Mapping out Min protein patterns in fully confined fluidic  
963 chambers. *Elife* 5:e19271
- 964 14. Denk J, *et al.* (2018) MinE conformational switching confers robustness on self-organized  
965 Min protein patterns. *Proc Natl Acad Sci USA* 115(18):4553-4558.
- 966 15. Litschel T, Ramm B, Maas R, Heymann M, & Schwille P (2018) Beating Vesicles:  
967 Encapsulated Protein Oscillations Cause Dynamic Membrane Deformations. *Angew Chem*  
968 *Int Ed* 57(50):16286-16290.
- 969 16. Yanagisawa M, Sakaue T, & Yoshikawa K (2014) Characteristic behavior of crowding  
970 macromolecules confined in cell-sized droplets. *Int Rev Cell Mol Biol* 307:175-204.
- 971 17. Kuchler A, Yoshimoto M, Luginbuhl S, Mavelli F, & Walde P (2016) Enzymatic  
972 reactions in confined environments. *Nat Nanotechnol* 11(5):409-420.
- 973 18. Watanabe C & Yanagisawa M (2018) Cell-size confinement effect on protein diffusion in  
974 crowded poly(ethylene)glycol solution. *Phys Chem Chem Phys* 20(13):8842-8847.
- 975 19. Zhabotinsky AM, Dolnik M, & Epstein IR (1995) Pattern formation arising from wave  
976 instability in a simple reaction—diffusion system. *J Chem Phys* 103(23):10306-10314.
- 977 20. Epstein IR & Showalter K (1996) Nonlinear chemical dynamics: Oscillations, patterns,  
978 and chaos. *J Phys Chem* 100(31):13132-13147.
- 979 21. Lee KJ, McCormick WD, Pearson JE, & Swinney HL (1994) Experimental-observation of  
980 self-replicating spots in a reaction-diffusion system. *Nature* 369(6477):215-218.
- 981 22. Fujiwara K & Yanagisawa M (2014) Generation of giant unilamellar liposomes containing  
982 biomacromolecules at physiological intracellular concentrations using hypertonic  
983 conditions. *ACS Synth Biol* 3(12):870-874.
- 984 23. Zhou HX, Rivas G, & Minton AP (2008) Macromolecular crowding and confinement:  
985 biochemical, biophysical, and potential physiological consequences. *Annu Rev Biophys*  
986 37:375-397.
- 987 24. Groen J, *et al.* (2015) Associative interactions in crowded solutions of biopolymers  
988 counteract depletion effects. *J Am Chem Soc* 137(40):13041-13048.
- 989 25. Schweizer J, *et al.* (2012) Geometry sensing by self-organized protein patterns. *Proc Natl*  
990 *Acad Sci USA* 109(38):15283-15288.
- 991 26. Martos A, *et al.* (2015) FtsZ polymers tethered to the membrane by ZipA are susceptible to  
992 spatial regulation by Min waves. *Biophys J* 108(9):2371-2383.
- 993 27. Shih YL, Fu X, King GF, Le T, & Rothfield L (2002) Division site placement in *E.coli*:  
994 mutations that prevent formation of the MinE ring lead to loss of the normal midcell arrest  
995 of growth of polar MinD membrane domains. *EMBO J* 21(13):3347-3357.
- 996 28. Zhou H, *et al.* (2005) Analysis of MinD mutations reveals residues required for MinE  
997 stimulation of the MinD ATPase and residues required for MinC interaction. *J Bacteriol*  
998 187(2):629-638.
- 999 29. Park KT, Villar MT, Artigues A, & Lutkenhaus J (2017) MinE conformational dynamics  
1000 regulate membrane binding, MinD interaction, and Min oscillation. *Proc Natl Acad Sci*  
1001 *USA* 114(29):7497-7504.



- 1002 30. Bonny M, Fischer-Friedrich E, Loose M, Schwille P, & Kruse K (2013) Membrane  
1003 binding of MinE allows for a comprehensive description of Min-protein pattern formation.  
1004 *PLoS Comput Biol* 9(12):e1003347.
- 1005 31. Huang KC, Meir Y, & Wingreen NS (2003) Dynamic structures in *Escherichia coli*:  
1006 spontaneous formation of MinE rings and MinD polar zones. *Proc Natl Acad Sci USA*  
1007 100(22):12724-12728.
- 1008 32. Hsieh CW, *et al.* (2010) Direct MinE-membrane interaction contributes to the proper  
1009 localization of MinDE in *E. coli*. *Mol Microbiol* 75(2):499-512.
- 1010 33. Vecchiarelli AG, Li M, Mizuuchi M, Ivanov V, & Mizuuchi K (2017) MinE recruits,  
1011 stabilizes, releases, and inhibits MinD interactions with membrane to drive oscillation.  
1012 *bioRxiv*:109637.
- 1013 34. Halatek J & Frey E (2018) Rethinking pattern formation in reaction–diffusion systems.  
1014 *Nat Phys* 14(5):507.
- 1015 35. Pismen LM (2006) *Patterns and interfaces in dissipative dynamics* (Springer Science &  
1016 Business Media).
- 1017 36. Keener JP (1980) Waves in excitable media. *SIAM J Appl Math* 39(3):528-548.
- 1018 37. Bär M & Eiswirth M (1993) Turbulence due to spiral breakup in a continuous excitable  
1019 medium. *Phys Rev E* 48(3):R1635.
- 1020 38. Winfree AT (1991) Varieties of spiral wave behavior: An experimentalist’s approach to  
1021 the theory of excitable media. *Chaos* 1(3):303-334.
- 1022 39. Ruggeri F, *et al.* (2013) Non-specific interactions between soluble proteins and lipids  
1023 induce irreversible changes in the properties of lipid bilayers. *Soft Matter* 9(16):4219-  
1024 4226.
- 1025 40. Miyazaki M, Chiba M, Eguchi H, Ohki T, & Ishiwata S (2015) Cell-sized spherical  
1026 confinement induces the spontaneous formation of contractile actomyosin rings in vitro.  
1027 *Nat Cell Biol* 17(4):480-489.
- 1028 41. Yanagisawa M, Nigorikawa S, Sakaue T, Fujiwara K, & Tokita M (2014) Multiple  
1029 patterns of polymer gels in microspheres due to the interplay among phase separation,  
1030 wetting, and gelation. *Proc Natl Acad Sci USA* 111(45):15894-15899.
- 1031 42. Good MC, Vahey MD, Skandarajah A, Fletcher DA, & Heald R (2013) Cytoplasmic  
1032 volume modulates spindle size during embryogenesis. *Science* 342(6160):856-860.
- 1033 43. Fujiwara K & Doi N (2016) Biochemical Preparation of Cell Extract for Cell-Free Protein  
1034 Synthesis without Physical Disruption. *PLoS One* 11(4):e0154614.
- 1035 44. Fujiwara K & Nomura SM (2013) Condensation of an additive-free cell extract to mimic  
1036 the conditions of live cells. *PLoS One* 8(1):e54155.
- 1037 45. Gou J, Li Y, Nagata W, & Ward M (2015) Synchronized oscillatory dynamics for a 1-D  
1038 model of membrane kinetics coupled by linear bulk diffusion. *SIAM J Appl Dyn Syst*  
1039 14(4):2096-2137.
- 1040 46. Turing AM (1952) The chemical basis of morphogenesis. *Phil Trans R Soc Lond B*  
1041 237(641):37-72.
- 1042 47. Gourley S & Britton N (1996) A predator-prey reaction-diffusion system with nonlocal  
1043 effects. *J Math Biol* 34(3):297-333.
- 1044 48. Okuzono T & Ohta T (2003) Traveling waves in phase-separating reactive mixtures. *Phys*  
1045 *Rev E* 67(5 Pt 2):056211.
- 1046 49. Kessler DA & Levine H (2016) Nonlinear self-adapting wave patterns. *New Journal of*  
1047 *Physics* 18(12):122001.
- 1048 50. Meinhardt H & de Boer PA (2001) Pattern formation in *Escherichia coli*: a model for the  
1049 pole-to-pole oscillations of Min proteins and the localization of the division site. *Proc Natl*  
1050 *Acad Sci USA* 98(25):14202-14207.

- 1051 51. Howard M, Rutenberg AD, & de Vet S (2001) Dynamic compartmentalization of bacteria:  
1052 accurate division in *E. coli*. *Phys Rev Lett* 87(27 Pt 1):278102.
- 1053 52. Huang KC & Wingreen NS (2004) Min-protein oscillations in round bacteria. *Phys Biol*  
1054 1(3-4):229-235.
- 1055 53. Halatek J & Frey E (2012) Highly canalized MinD transfer and MinE sequestration  
1056 explain the origin of robust MinCDE-protein dynamics. *Cell Rep* 1(6):741-752.
- 1057 54. Fange D & Elf J (2006) Noise-induced Min phenotypes in *E. coli*. *PLoS Comput Biol*  
1058 2(6):e80.
- 1059 55. Kerr RA, Levine H, Sejnowski TJ, & Rappel WJ (2006) Division accuracy in a stochastic  
1060 model of Min oscillations in *Escherichia coli*. *Proc Natl Acad Sci USA* 103(2):347-352.
- 1061 56. Arjunan SN & Tomita M (2010) A new multicompartmental reaction-diffusion modeling  
1062 method links transient membrane attachment of *E. coli* MinE to E-ring formation. *Syst*  
1063 *Synth Biol* 4(1):35-53.
- 1064 57. Hoffmann M & Schwarz US (2014) Oscillations of Min-proteins in micropatterned  
1065 environments: a three-dimensional particle-based stochastic simulation approach. *Soft*  
1066 *Matter* 10(14):2388-2396.
- 1067 58. Halatek J & Frey E (2014) Effective 2D model does not account for geometry sensing by  
1068 self-organized proteins patterns. *Proc Natl Acad Sci USA* 111(18):E1817.
- 1069  
1070  
1071

## 1072 **Acknowledgments**

1073  
1074 We thank Ms. A. Yoshida (Keio University) for supporting protein purification, Prof. K.  
1075 Yoshikawa (Doshisha University), Prof. H. Kitahata (Chiba University), Prof. T. Sakurai  
1076 (Chiba University), Prof. Karsten Kruse (University of Geneva), and Prof. Toshiyuki  
1077 Ogawa (Meiji University) for helpful discussion. We thank the financial support by JSPS  
1078 KAKENHI Grant Number JP16H00809, JP26650044, JP15KT0081, JP15H00826,  
1079 JP18H04565 for K.F., JP26800219, JP16H00793, and JP17K05605 for N.Y. We also  
1080 thank Ph.D. Program Research Grant at Keio university for S.K.

1081  
1082

1083 **Competing interests:** The authors declare no competing financial interests.

1084



1085  
1086  
1087  
1088

## Figures and Tables

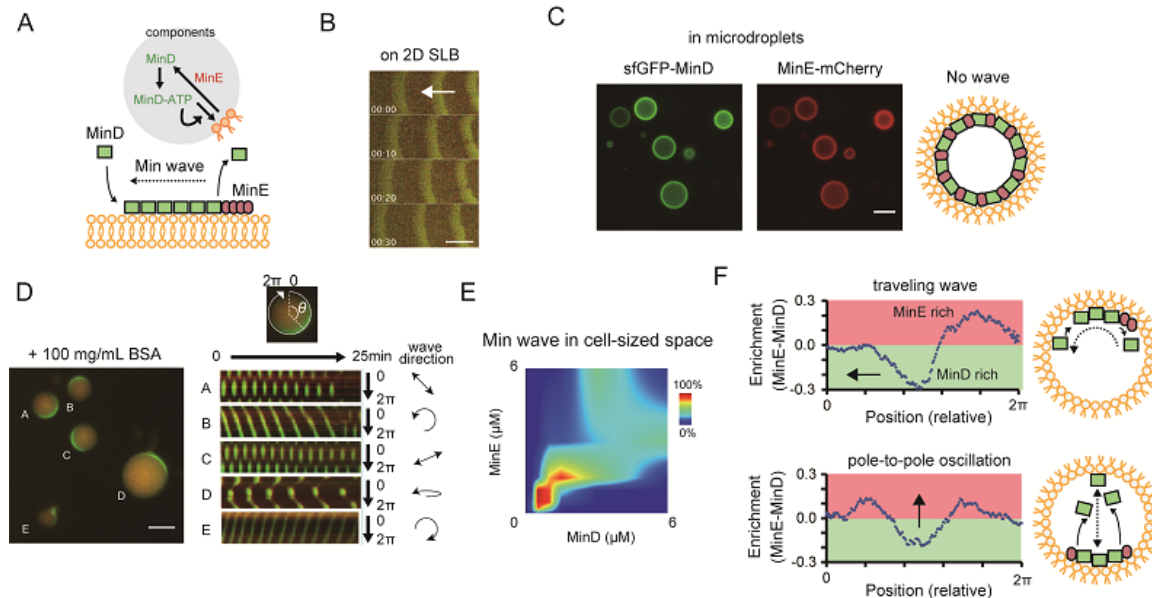

1089  
1090  
1091  
1092  
1093  
1094  
1095  
1096  
1097  
1098  
1099  
1100  
1101  
1102  
1103  
1104  
1105  
1106

**Figure 1: Min waves emergence in microdroplets as a result of high concentration BSA addition** (A) Schematic illustration of a simplified molecular mechanisms underlying Min wave propagation and the experimental system. (B) Min wave on 2D supported lipid bilayers (SLB). (C,D) Microdroplets encapsulating 1  $\mu\text{M}$  sfGFP-MinD, MinE-mCherry, and 2.5 mM ATP in the absence (C) or the presence of 100 mg/mL BSA (D). Scale bars: 10  $\mu\text{m}$ . Kymographs of sfGFP-MinD (green) and MinE-mCherry (red) in the proximity of membranes in each droplet shown at the right of each panel. Kymographs were generated by tracking fluorescence intensities along circumference lines on membrane surface. Arrows beside the kymographs show the direction and mode of Min wave. Single-round and double-headed arrows indicate traveling wave and pole-to-pole oscillation, respectively. (E) Probability of inhomogeneous localization and wave propagation revealed by the reconstitution experiments at various concentrations of sfGFP-MinD and MinE-mCherry in microdroplets. (F) Enrichment profiles of MinD and MinE derived from normalized surface plots.

1107  
1108  
1109  
1110  
1111  
1112

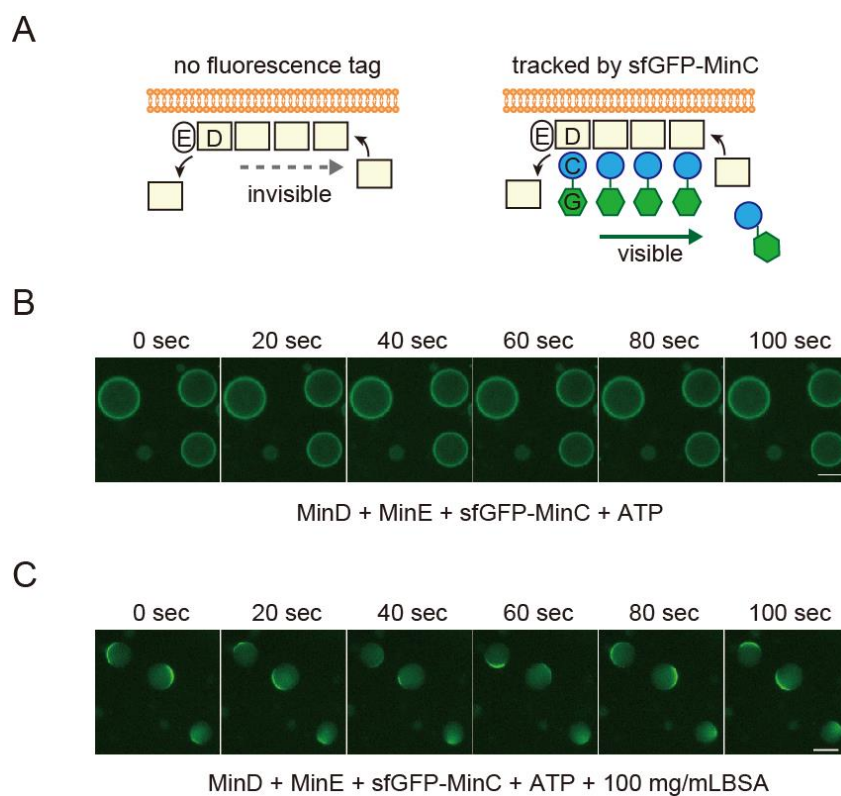

1113  
1114  
1115  
1116  
1117  
1118  
1119  
1120  
1121

**Figure 1—figure supplement 1: Tracking MinD by fluorescence-tagged MinC.**

(A) Representative illustration of MinD tracking by MinC fused with sfGFP at N-terminal. C, D, E, and G indicates MinC, MinD, MinE, and sfGFP. Because of interaction between MinD and MinC, sfGFP-MinC can track movement of no-tagged MinD. (B) and (C) indicates results of the time-lapse images of MinD tracked sfGFP-tracking without (B) or with (C) 100 mg/mL BSA.

1122

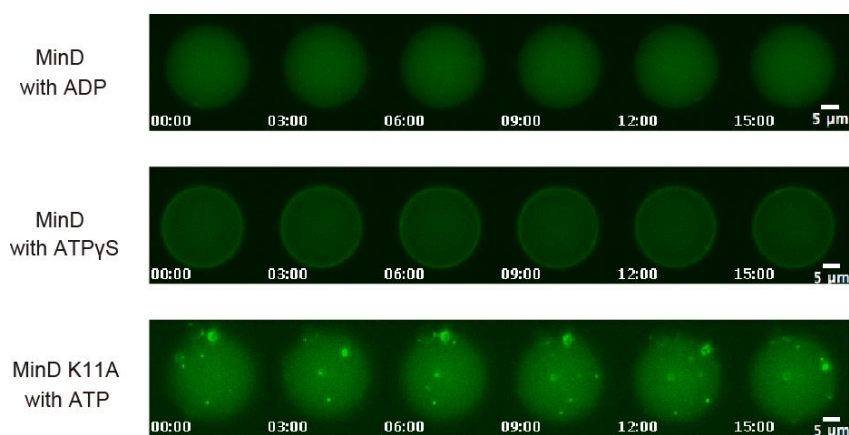

1123

1124

1125

1126

1127

1128

1129

1130

1131

**Figure 1—figure supplement 2: ATP dependence of the Min system on wave propagation in microdroplets containing 100 mg/mL BSA.** ATP requirements of the Min wave were examined by replacing ATP with ADP or ATP $\gamma$ S, and MinD with an ATPase-deficient MinD mutant (K11A) (28). Time-lapse images of MinD or its mutant in a representative droplet are shown.

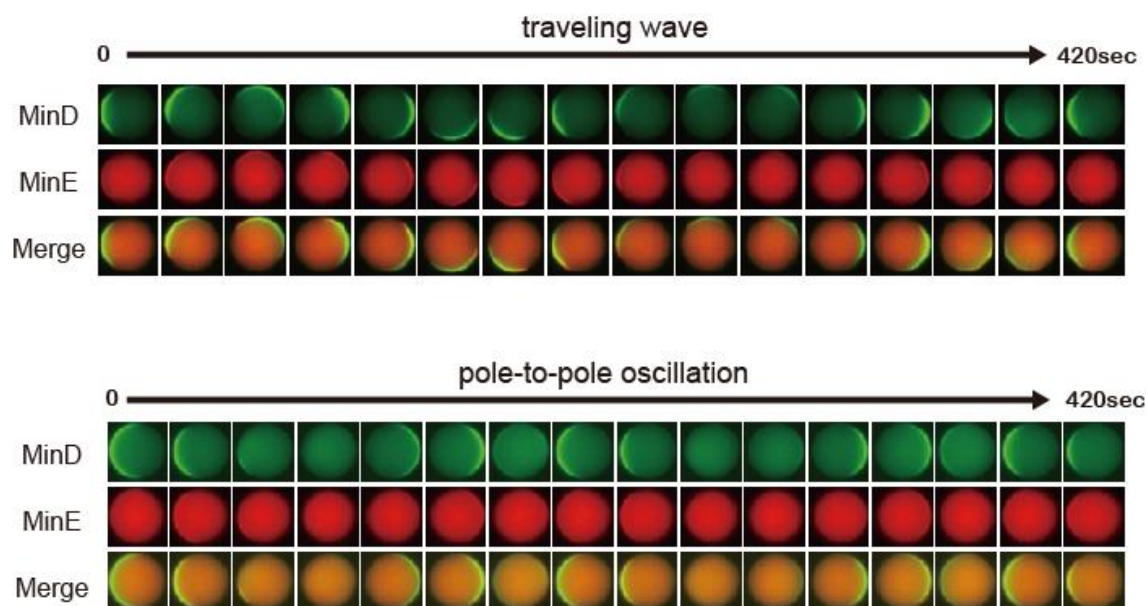

1132

1133

1134

1135

1136

1137

1138

1139

1140

1141

**Figure 1—figure supplement 3: Time-lapse images of propagation waves in microdroplets.** Representative time-lapse images of traveling wave and pole-to-pole oscillation in microdroplets were shown. Diameters of microdroplets are 25  $\mu$ m (traveling waves) and 22  $\mu$ m (pole-to-pole oscillation).

1142  
1143  
1144  
1145  
1146

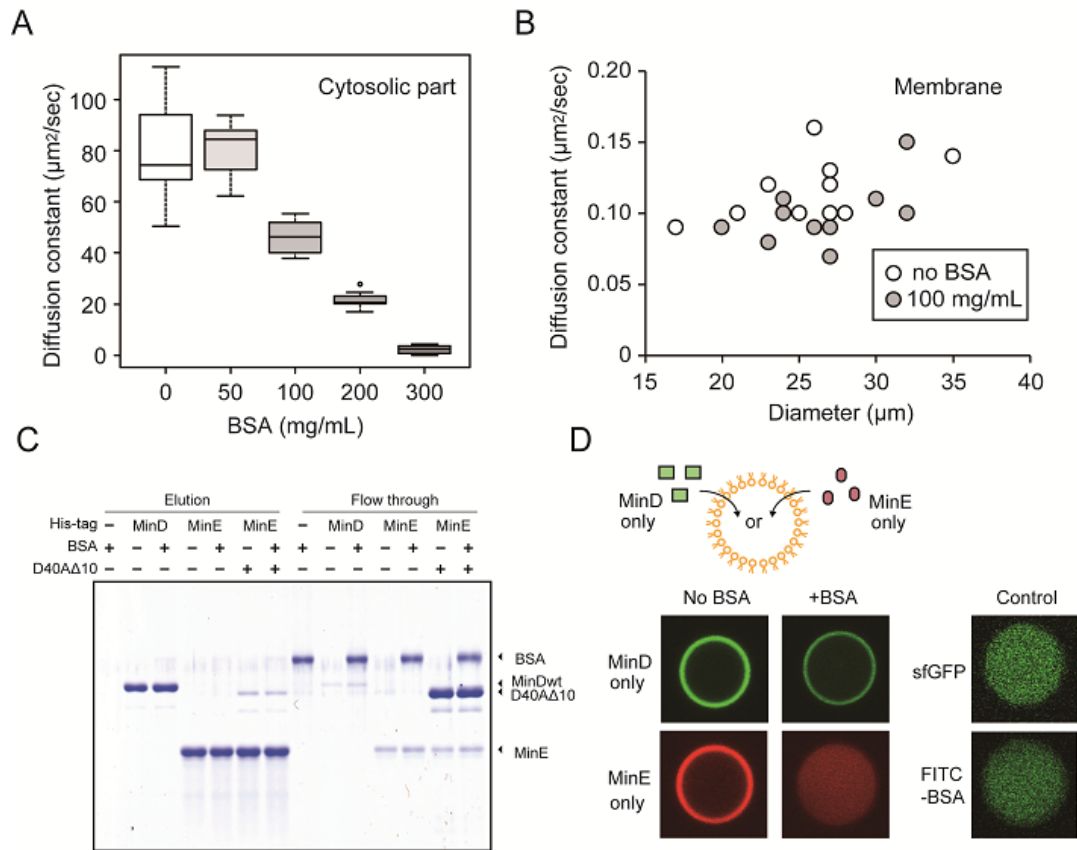

1147  
1148  
1149  
1150  
1151  
1152  
1153  
1154  
1155  
1156  
1157  
1158  
1159  
1160  
1161  
1162

**Figure 2: The effects of BSA on Min wave elements in cell-sized droplets** (A) Diffusion coefficients of sfGFP in solutions with various BSA concentrations entrapped in microdroplets ( $n = 10$ ). (B) Diffusion coefficients of sfGFP-MinD attached on lipid membranes with or without 100 mg/mL BSA ( $n = 10$ ) plotted as a function of microdroplet diameters. (C) Pull-down assay for BSA and Min proteins. His-sfGFP-MinD, MinE-mCherry-His, or sfGFP-MinD<sup>D40A</sup> $\Delta$ 10 with MinE-mCherry-His was incubated with Ni-NTA resins under existence of BSA or not. The eluted fractions by imidazole and the flow through were visualized by CBB staining. (D) Inhibition of spontaneous binding between membranes and Min proteins by BSA. Either sfGFP-MinD or MinE-mCherry was encapsulated in the presence or absence of 50 mg/mL BSA. Microdroplets with 20  $\mu\text{m}$  diameter were shown. As a control, the same experiments using 1  $\mu\text{M}$  sfGFP only or 1  $\mu\text{M}$  FITC-labelled BSA with 1 mg/mL BSA (right panel, 10  $\mu\text{m}$  diameter droplets).

1163  
1164  
1165  
1166  
1167

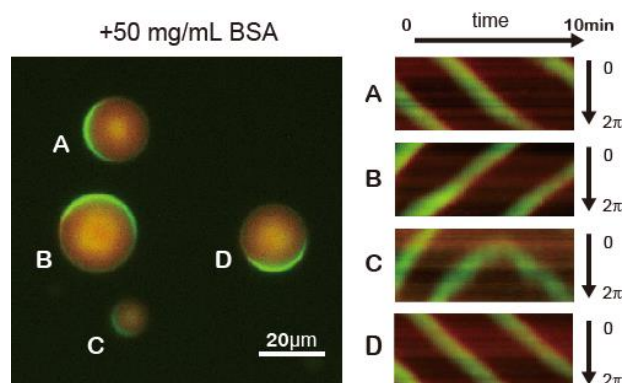

1168  
1169  
1170  
1171  
1172  
1173  
1174  
1175

**Figure 2—figure supplement 1: Traveling waves emerging in microdroplets containing 50 mg/mL BSA.** Kymographs of MinD and MinE on the membrane of each droplet are shown. Green and red indicates sfGFP-MinD and MinE-mCherry, respectively.

1176  
1177  
1178  
1179  
1180  
1181

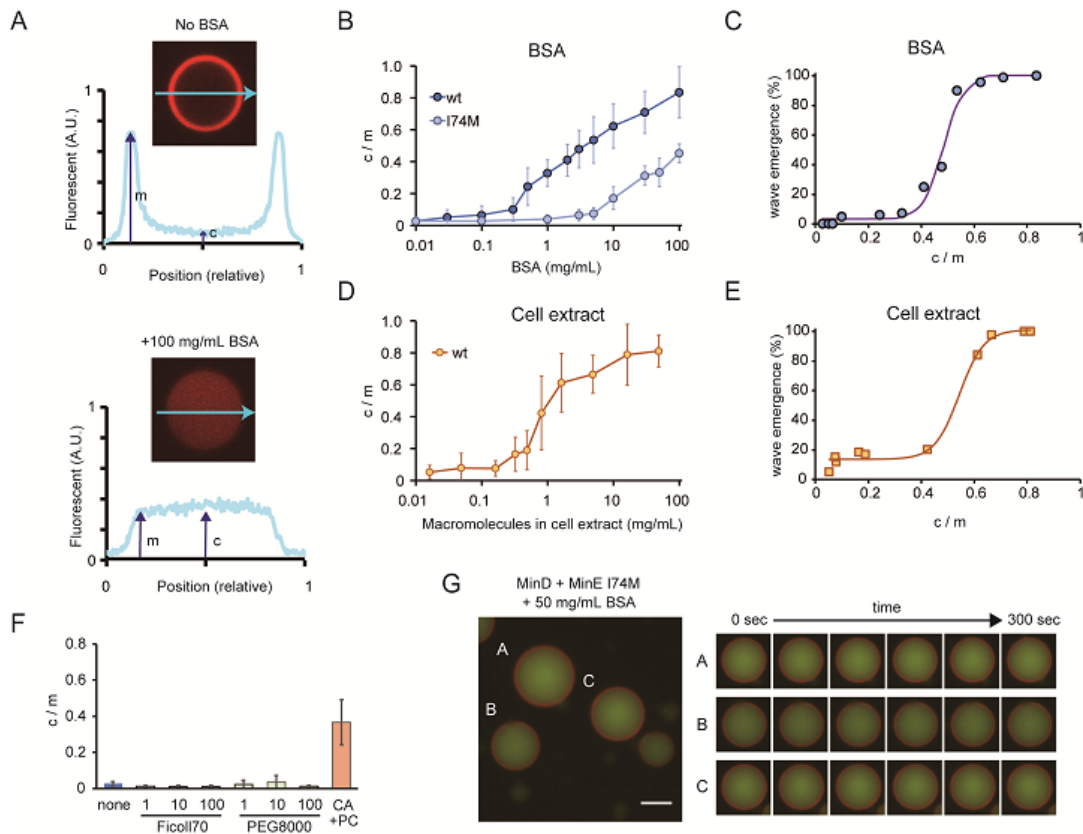

1182  
1183  
1184  
1185  
1186  
1187  
1188  
1189  
1190  
1191  
1192  
1193  
1194  
1195  
1196  
1197

**Figure 3: Relations between the rate of spontaneous localization of MinE on membrane and Min wave emergence** (A) Schematic illustrations of the method to evaluate MinE localization ( $c/m$ ). (B, D) Changes of  $c/m$  of MinE-mCherry and its I74M mutants by various BSA concentrations (B) and by cell extract (D). (C, E) Probabilities of microdroplets with Min wave plotted as a function of  $c/m$  in the case of BSA (B) and cell extract (D), respectively. The fitting lines are sigmoidal curves. (F) Effects of macromolecular crowding agents (1, 10, 100 mg/mL) and the modified lipid condition (15% cardiolipin and 85% DOPC condition, abbreviated as CA+PC) on  $c/m$  of MinE-mCherry. Microdroplets smaller than 30  $\mu\text{m}$  diameters were selected and  $c/m$  of 1  $\mu\text{M}$  MinE-mCherry were evaluated. (G) Wide-view and sequential images of microdroplets encapsulating 1  $\mu\text{M}$  sfGFP-MinD, 1  $\mu\text{M}$  MinE<sup>I74M</sup>-mCherry, 2.5 mM ATP and 50 mg/mL BSA. Scale bar: 10  $\mu\text{m}$ . In each figure, average and standard deviation were shown.

1198  
1199  
1200  
1201  
1202  
1203  
1204  
1205  
1206  
1207

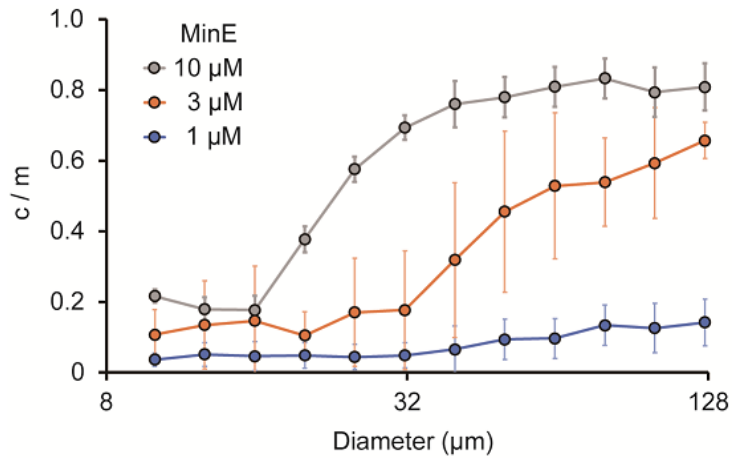

1208  
1209  
1210  
1211  
1212  
1213  
1214  
1215

**Figure 4: Size-dependence of c/m**

Spontaneous localization of MinE-mCherry were plotted against sizes of microdroplets. Average of c/m ratio at each 0.1 logarithmic scale were shown (n = 208 for 1  $\mu\text{M}$ , 386 for 3  $\mu\text{M}$ , and 184 for 10  $\mu\text{M}$ ). Error bars indicate standard deviation.



1216  
1217  
1218

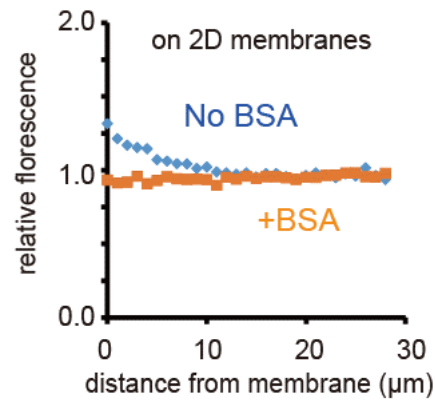

1219  
1220  
1221  
1222  
1223  
1224  
1225  
1226  
1227  
1228  
1229  
1230  
1231  
1232

**Figure 4—figure supplement 1: Localization of MinE near the two-dimensional planar membrane.** Localization of MinE near the two-dimensional SLB was analysed by confocal microscopy. Relative fluorescence intensity plotted as a function of distance from the SLB. Fluorescence intensity was normalized by the value of 100  $\mu\text{m}$  from two-dimensional SLB after subtraction of background noise.

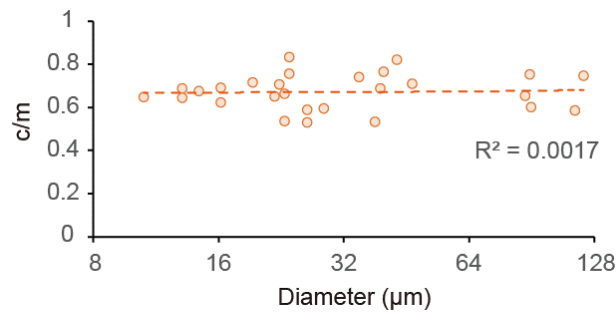

1233  
1234  
1235  
1236  
1237  
1238  
1239  
1240  
1241  
1242

**Figure 4—figure supplement 2: Size-dependence of  $c/m$  in microdroplets contacting 10 mg/mL BSA.** Spontaneous localization rates ( $c/m$ ) of MinE-mCherry in microdroplets contacting 10mg/mL BSA were plotted against sizes of microdroplets.

1243  
1244

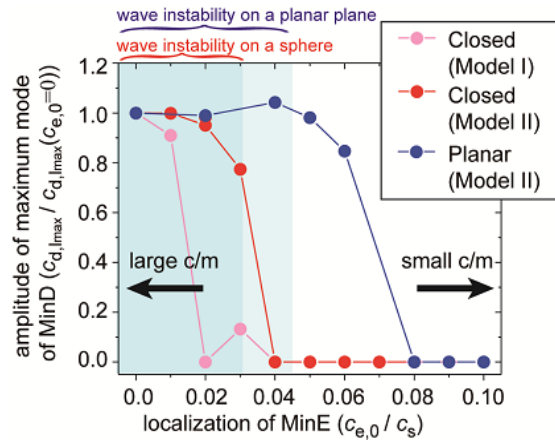

1245  
1246  
1247  
1248  
1249  
1250  
1251  
1252  
1253  
1254  
1255  
1256  
1257  
1258  
1259  
1260

**Figure 5: Simulation results of wave generation in the presence of membrane attachment of MinE**

The simulation results of wave generation in the presence of spontaneous MinE interaction at  $\mathcal{D}_0 = 0.5$  and  $\mathcal{E}_0 = 0.8$  (see Methods) are shown. The results of the closed spherical membrane and the planar membrane are shown. Waves are characterized by the amplitude of the first mode ( $l = 1$ ) in spherical harmonics expansion of the closed membrane, and by the maximum amplitude at a finite wave number in the planar membrane. The amplitude is normalized by its value without spontaneous MinE localization. Stability analysis of the homogeneous state calculated by the real part of maximum eigenvalue shows that the homogeneous state is stable in the dark (closed membrane) and light (planar membrane) shaded areas, but linearly unstable otherwise.

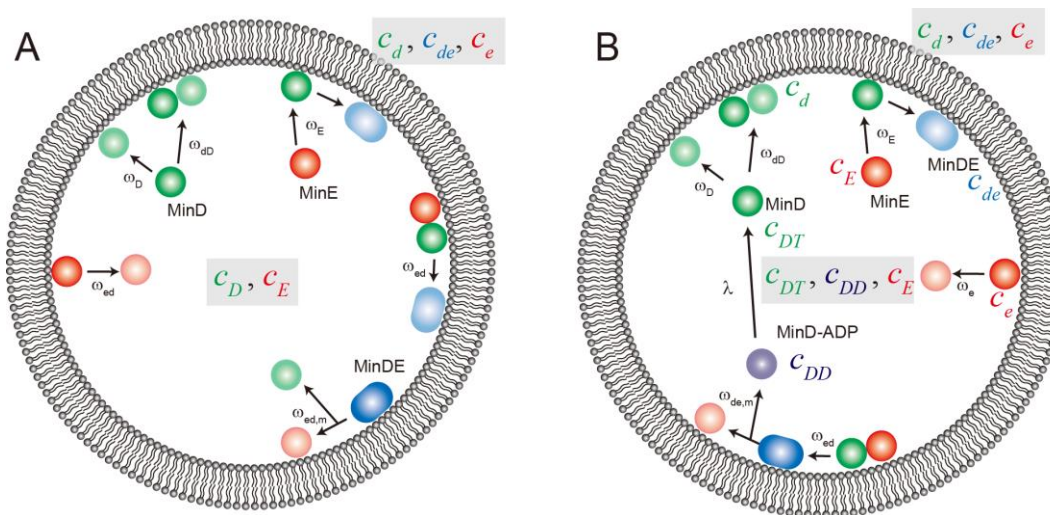

1261  
1262  
1263  
1264  
1265  
1266

**Figure 5—figure supplement 1: Reaction scheme for computational simulation of Min waves in cell-sized space.** Schematic illustration of reaction constants used in our computational simulation model (A for model I, B for model II) are shown.

1267

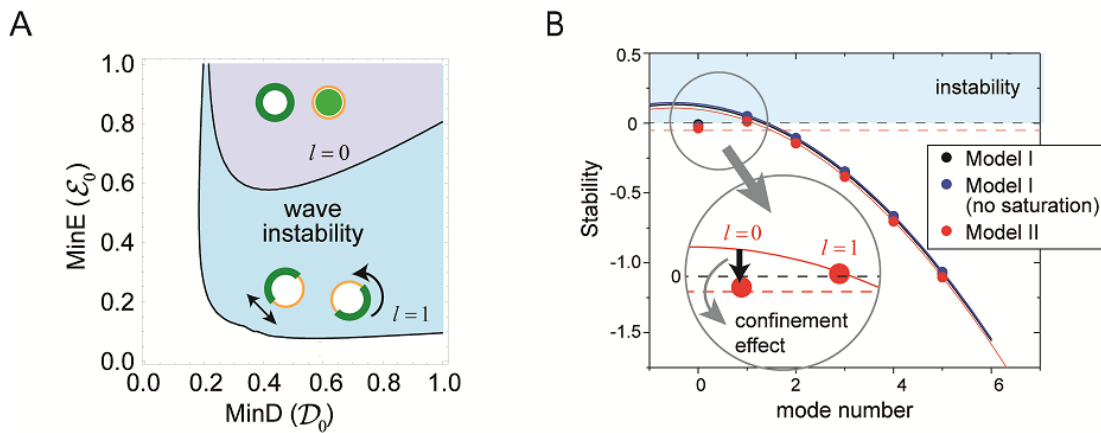

1268

1269

1270

1271

1272

1273

1274

1275

1276

1277

1278

1279

1280

1281

1282

1283

1284

1285

**Figure 6: Regulation of generation and stability of Min wave by confinement**

(A) The phase diagram obtained from linear stability analysis of wave instability (the first mode,  $l = 1$ ) and homogeneous oscillation (the zeroth mode,  $l = 0$ ) under various total concentrations of MinD and MinE in the closed membrane of its size  $R = 5$  in Model II. (B) Stability of the homogeneous state for each mode obtained by a real part of eigenvalue in different models near the transition point of wave generation,  $\mathcal{D}_0 = 0.2$  and  $\mathcal{E}_0 = 0.8$ . Instability is demonstrated by positive eigenvalues. The black dashed line indicates neutral stability in which the real part of eigenvalue is zero. The theoretical results under approximation that neglect the effect of bulk dynamics are demonstrated by the solid lines (See Methods and Figure 6—figure supplement 1). Each color (black, blue, and red) corresponds to a different model. The dashed red line shows the stability of the homogeneous state theoretically obtained by including the effect of confinement.

1286

1287

1288

1289

1290

1291

1292

1293

1294

1295

1296

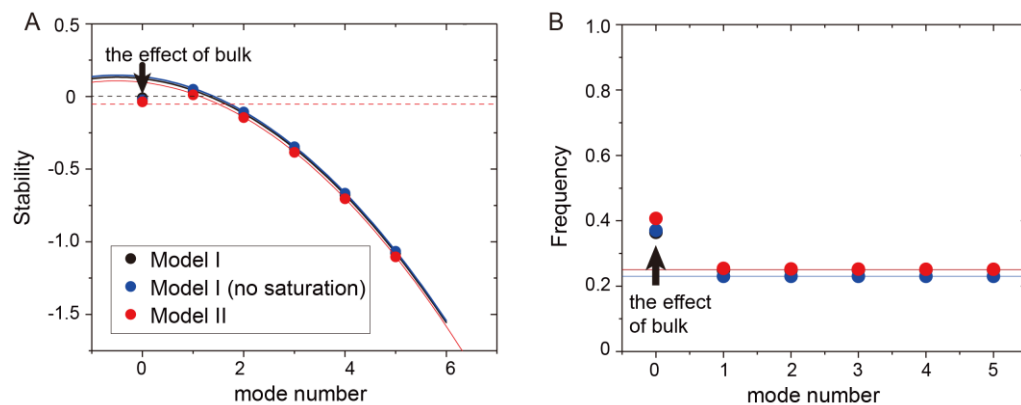

**Figure 6—figure supplement 1: Mode dependence of stability and frequency of the different models obtained from linear stability analysis.**

(A) Real part of eigenvalues. The dashed black line denotes a zero eigenvalue. (B) imaginary part of eigenvalues. The stability and frequency obtained from the analysis without the effect of bulk is shown by solid lines for Model I (black), Model I without saturation term (blue), and Model II (red). The dashed red line in (A) shows the stability of the homogeneous state with the effect of confinement.

1297

1298

1299

1300

1297  
1298  
1299  
1300  
1301  
1302  
1303

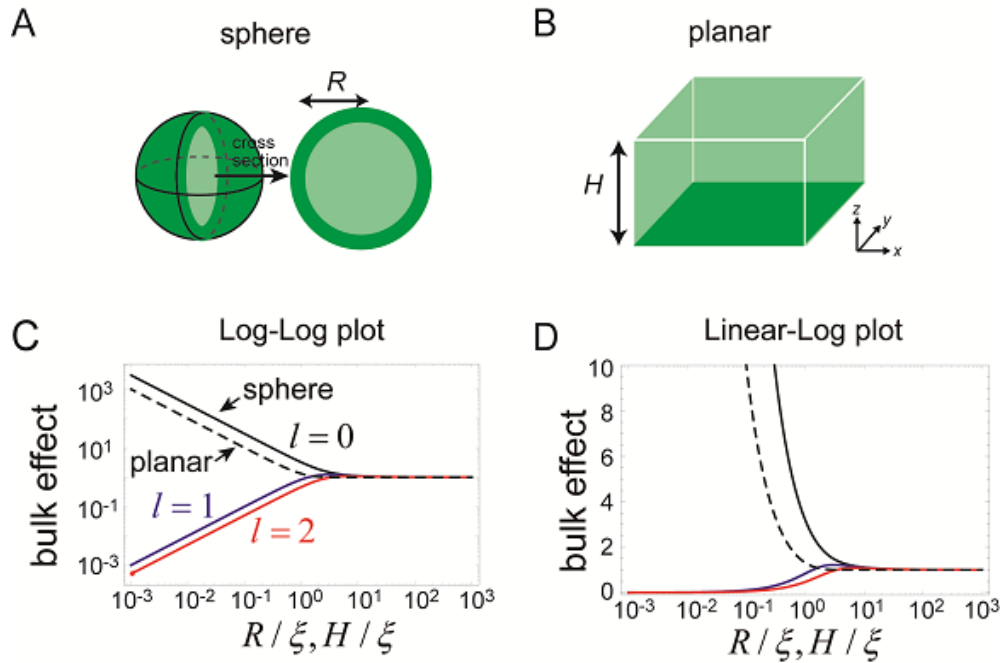

1304  
1305  
1306  
1307  
1308  
1309  
1310  
1311  
1312  
1313  
1314  
1315  
1316

**Figure 7: Effects of bulk in the models**

(**A**, **B**) Schematic illustration of closed membrane with the radius,  $R$ , (**A**), and planar membrane with the height,  $H$ , (**B**). Membrane-bound proteins are denoted by dark green, while bulk proteins are shown in light green. (**C**, **D**) The log-log (**C**) and log-linear (**D**) plots of  $i_l(R/\xi)/i_l'(R/\xi)$  as a function of  $R/\xi$ . The homogeneous mode ( $l=0$ , black) and the two lowest inhomogeneous modes ( $l=1$ , blue, and  $l=2$ , red) are shown in solid lines. The corresponding term in the planar membrane,  $\cosh(H/\xi)/\sinh(H/\xi)$  as a function of  $H/\xi$ , is shown in dashed line.

1317  
1318  
1319

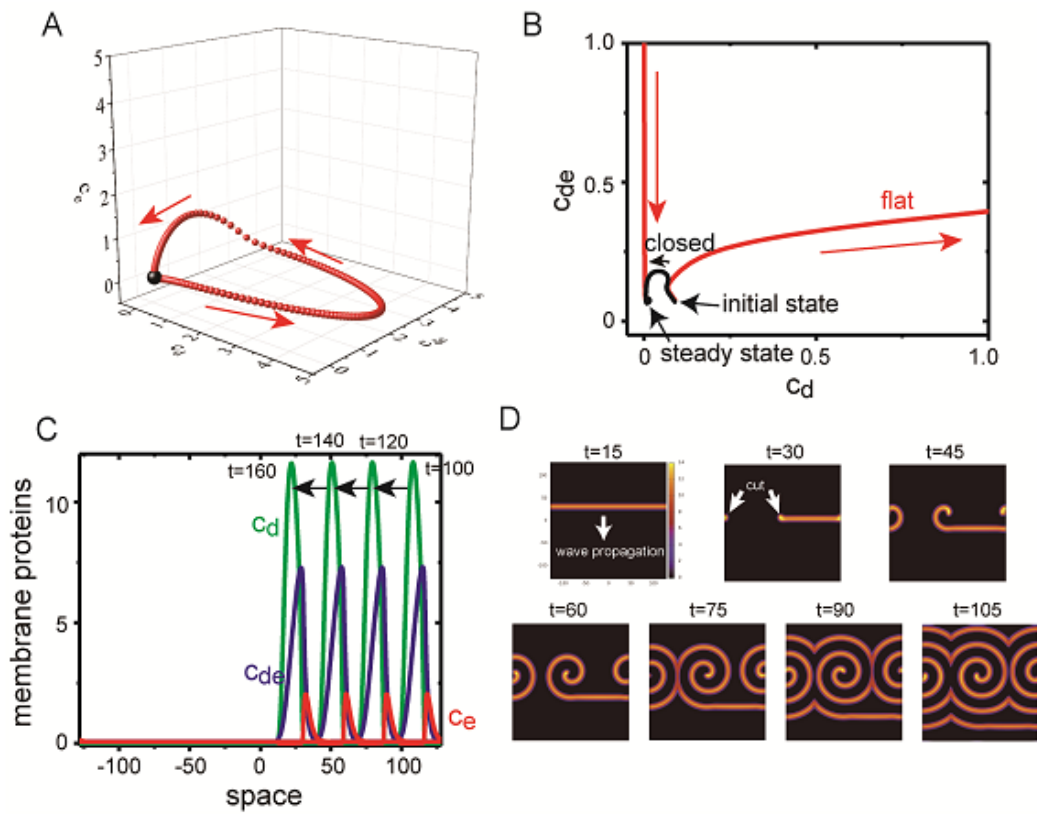

1320  
1321  
1322  
1323  
1324  
1325  
1326  
1327  
1328  
1329  
1330  
1331

**Figure 8: Excitability of Min waves on the planar membranes**

(A) Trajectory of the concentrations of membrane proteins in  $(c_d, c_{de}, c_e)$  coordinates starting from the initial condition slightly shifted from the homogeneous stationary state at  $\mathcal{D}_0 = 0.5$ ,  $\mathcal{E}_0 = 0.8$  and  $c_{e,0} = 0.07$ . (B) Trajectory near the stationary state in  $(c_d, c_{de})$  plane on the planar membrane ( $H = 256$ , red) and on the closed membrane ( $R = 5$ , black). (C) A propagating pulse in one-dimensional membrane surrounded by two-dimensional bulk. (D) A propagating band and a spiral wave in two-dimensional planar membrane underneath the three-dimensional bulk. Initially, an isolated band is prepared and let it propagates, and then cut it at  $t = 22.5$  to make a spiral wave.



1332  
1333  
1334  
1335  
1336  
1337  
1338  
1339  
1340  
1341  
1342  
1343

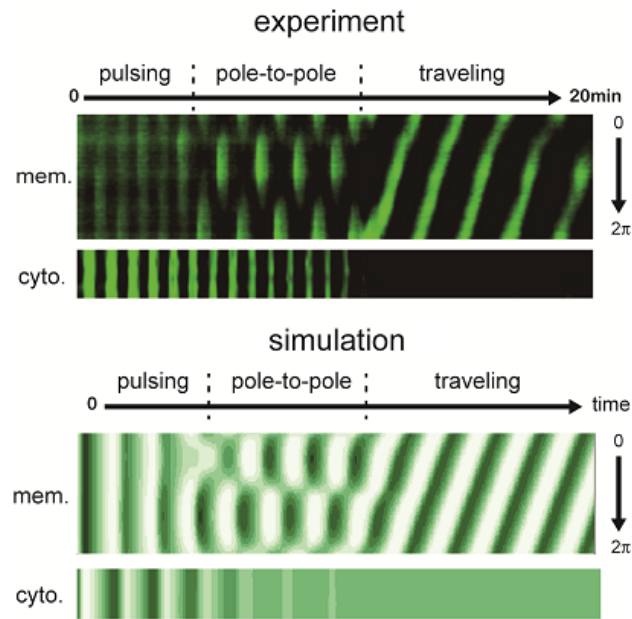

1344  
1345  
1346  
1347  
1348  
1349  
1350  
1351  
1352  
1353  
1354  
1355

**Figure 9: Early stages of Min wave emergence inside microdroplets and on 2D membranes**  
Transition of patterns from pulsing during the initial stage of wave emergence to stable traveling wave. Kymographs of sfGFP-MinD in the membranes and inner media of droplets obtained by experiments (**top**) and numerical simulation without noise (**bottom**) are shown.

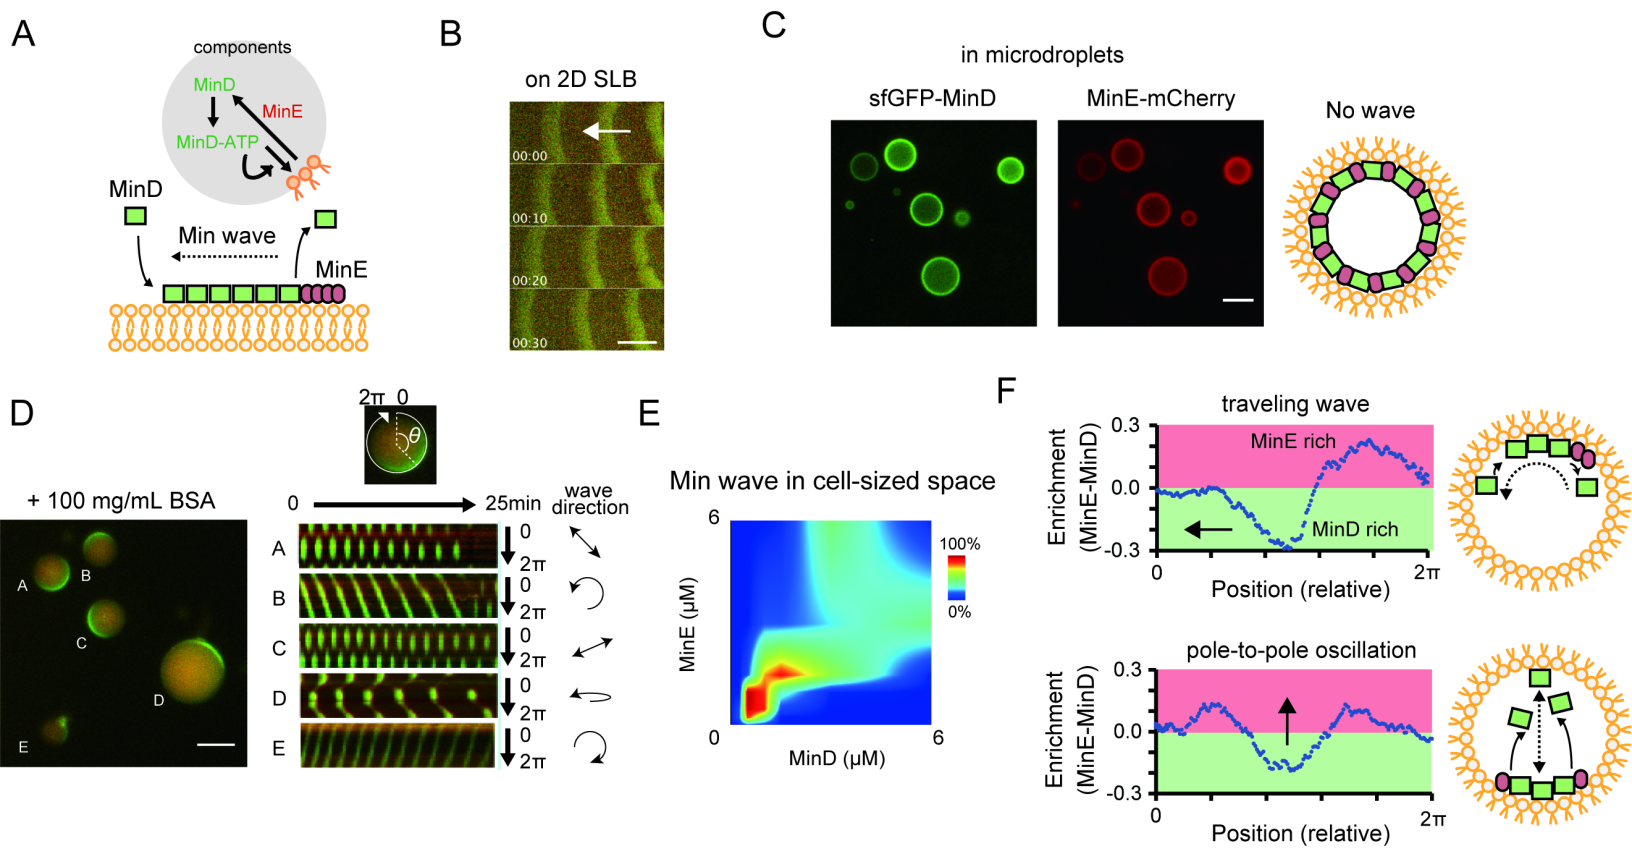

A

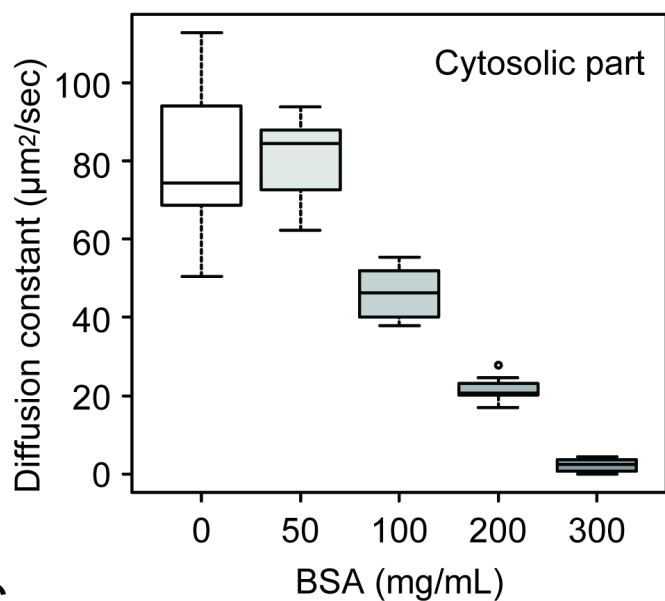

B

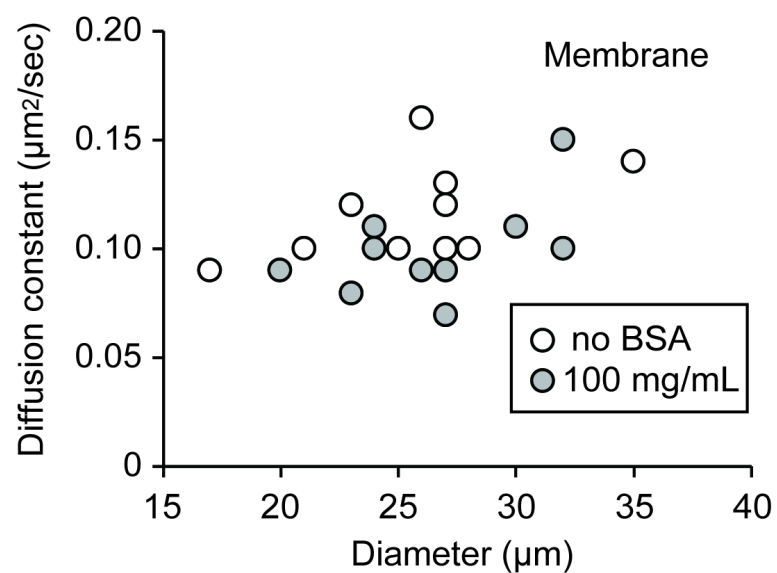

C

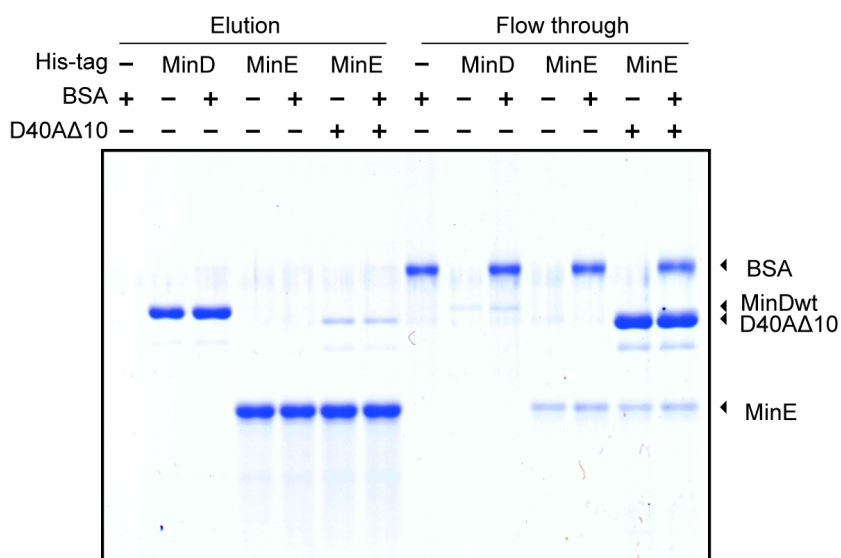

D

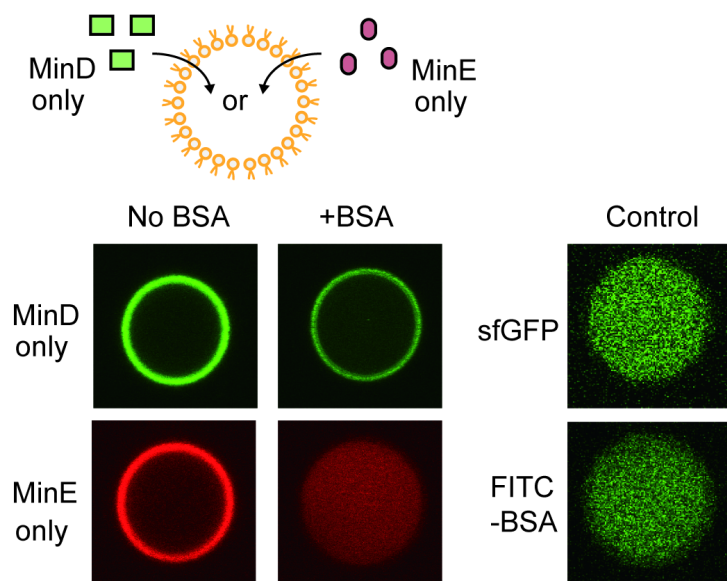

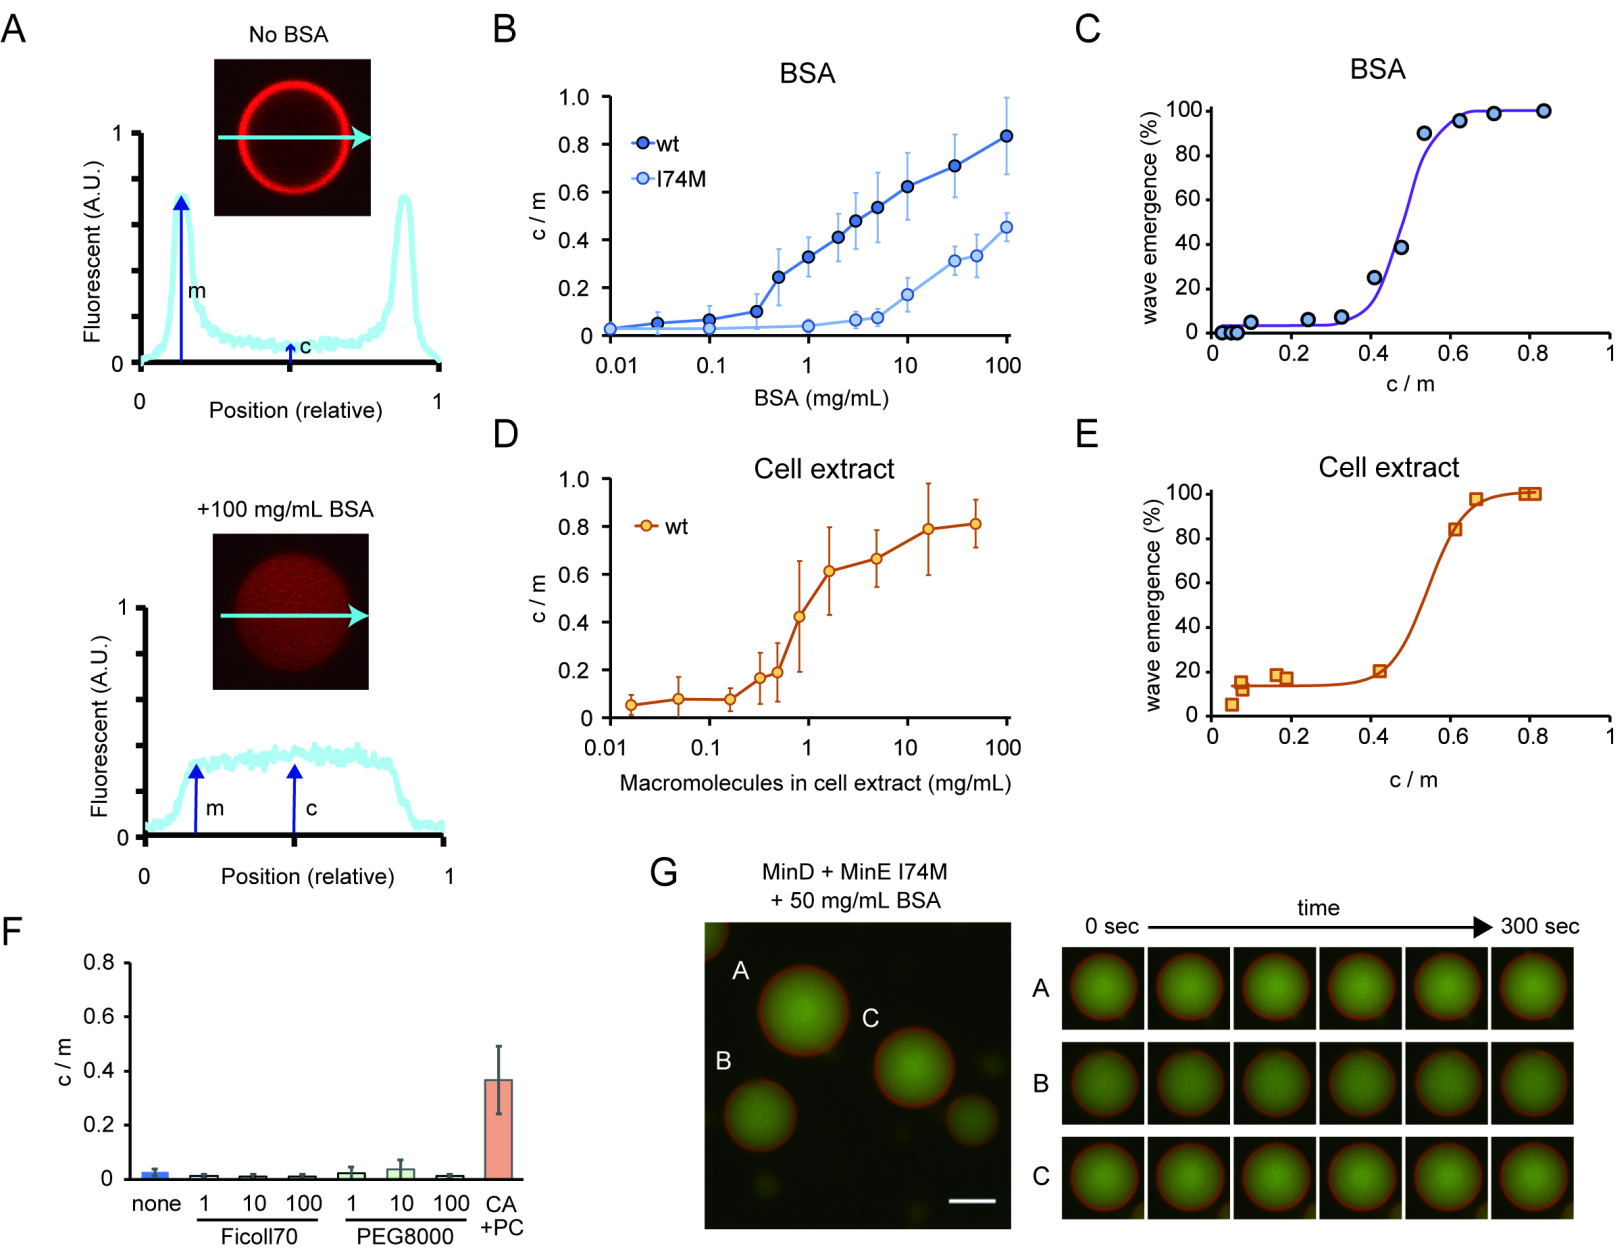

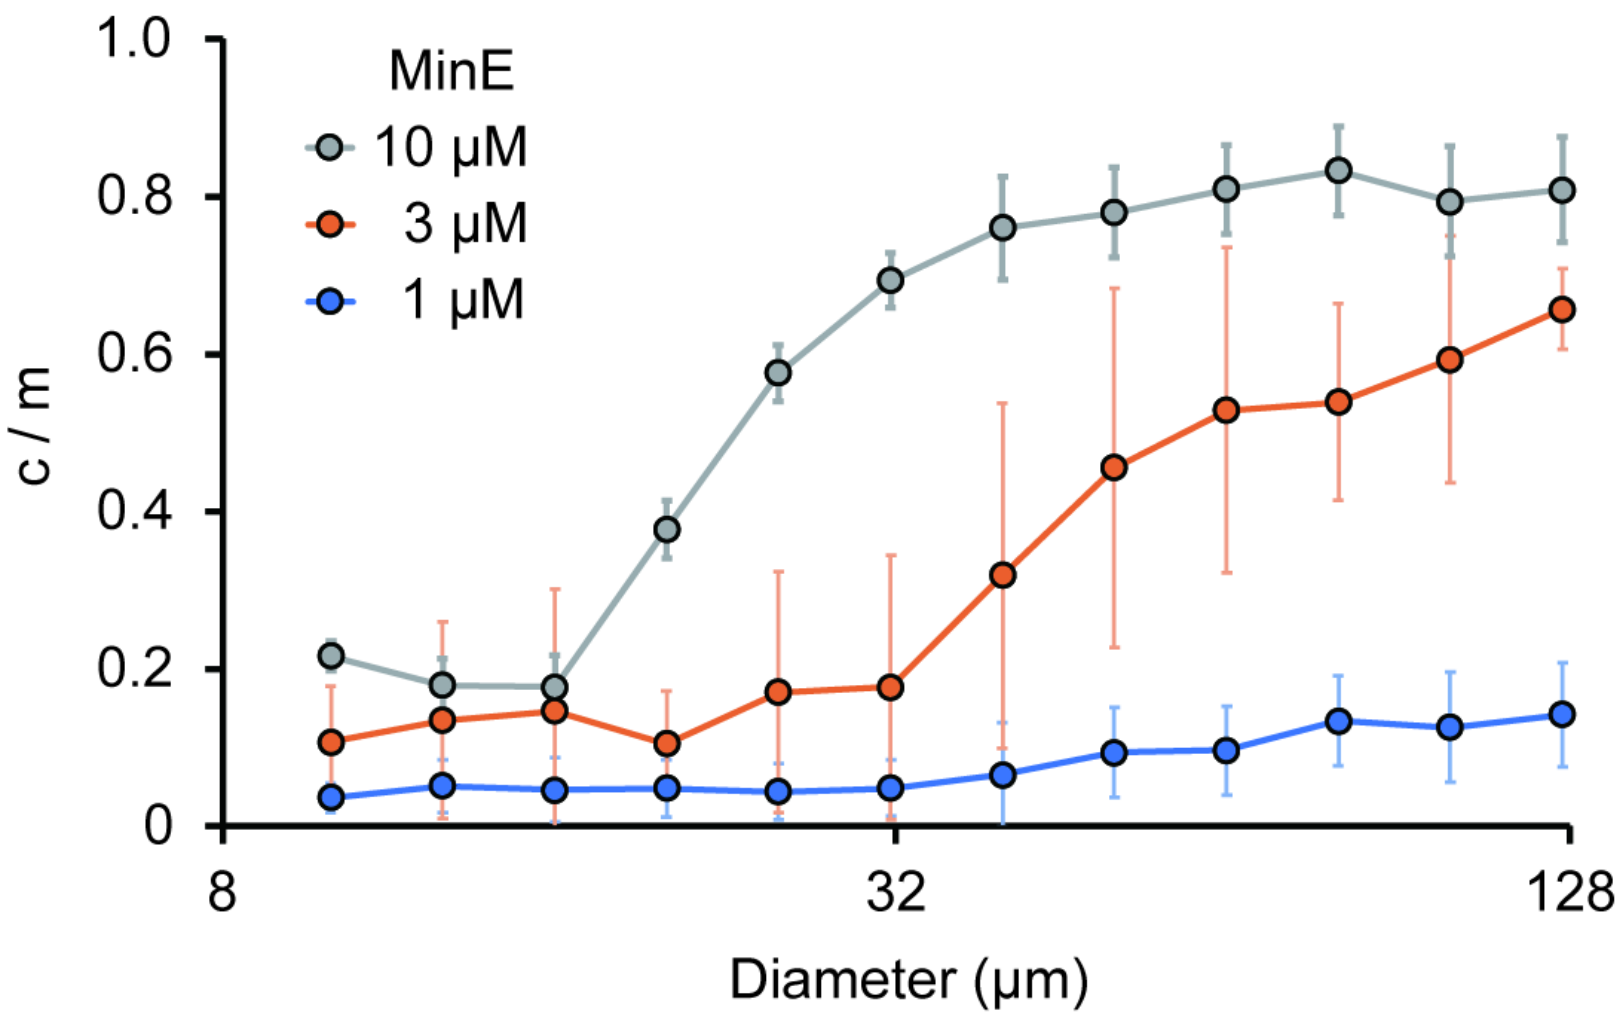



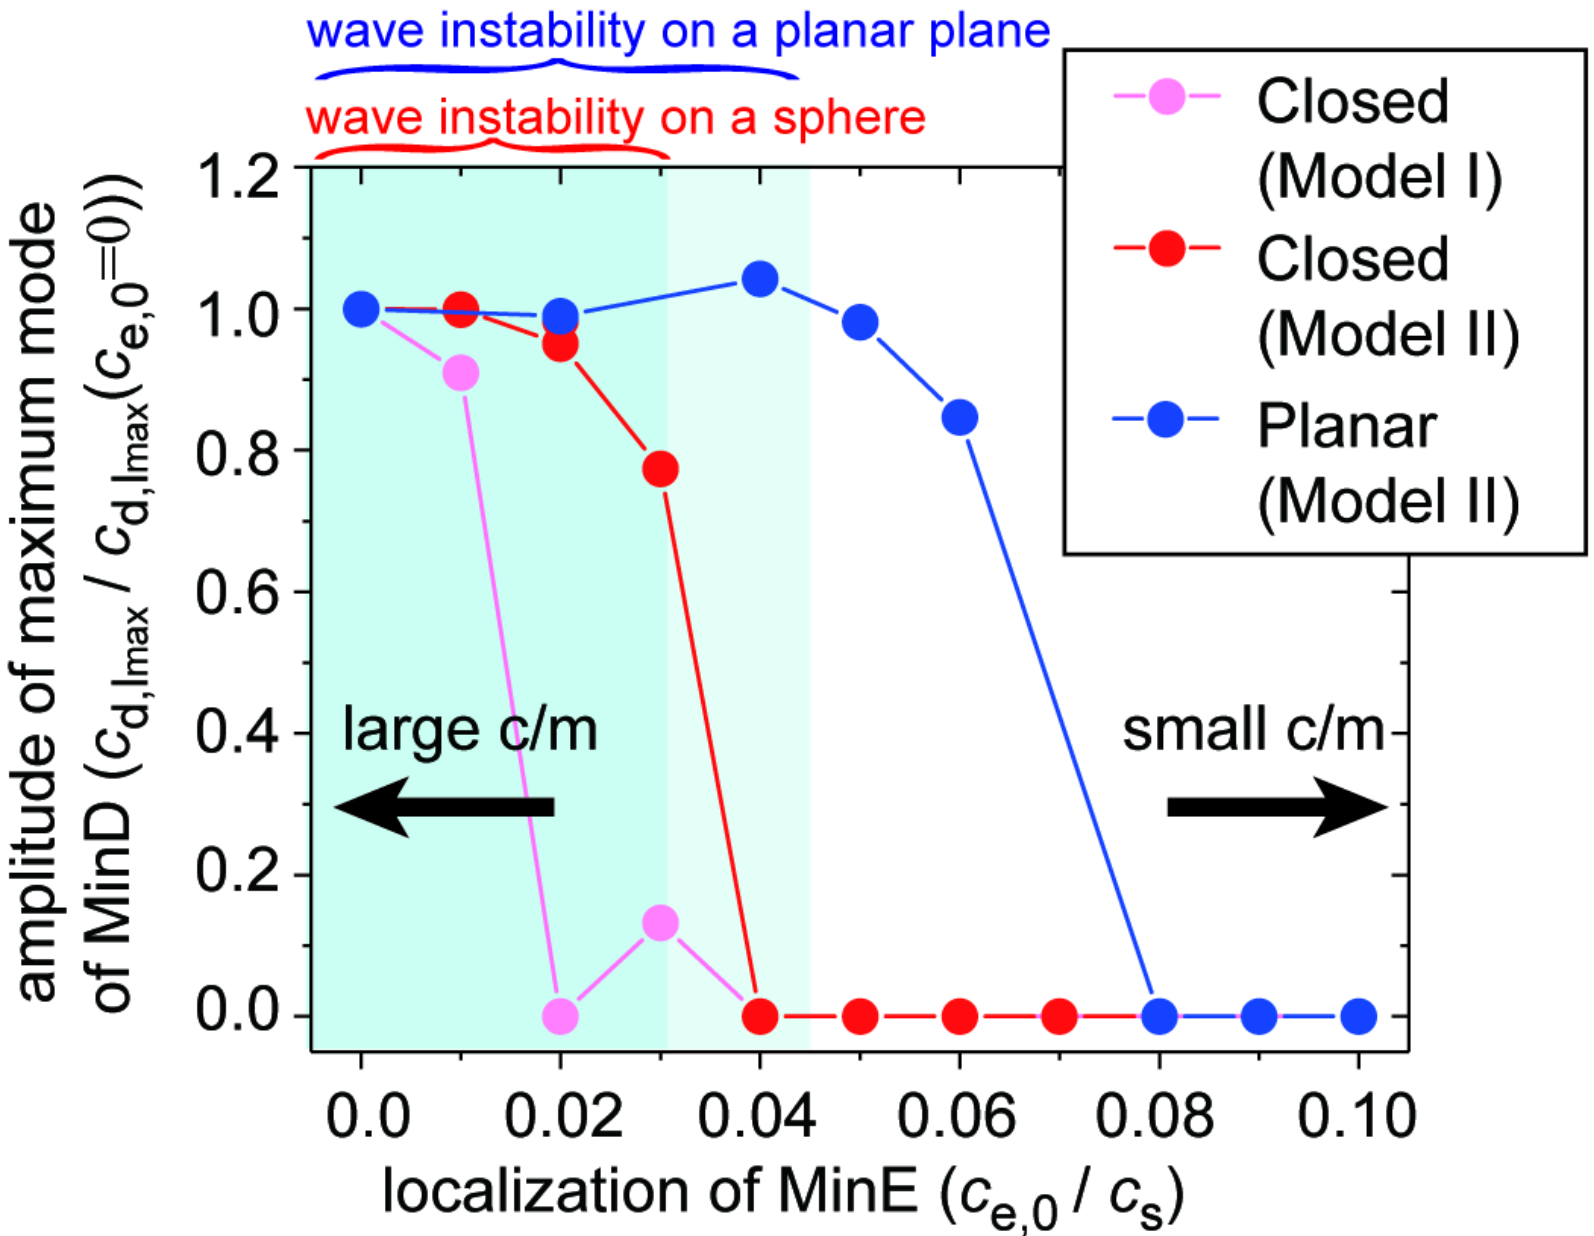

A

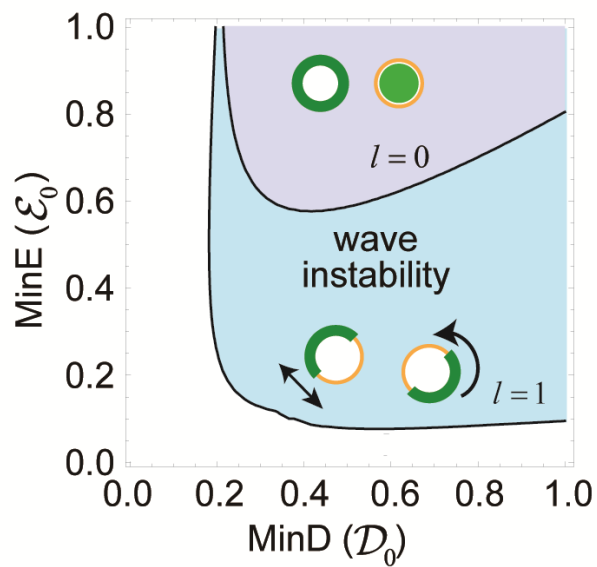

B

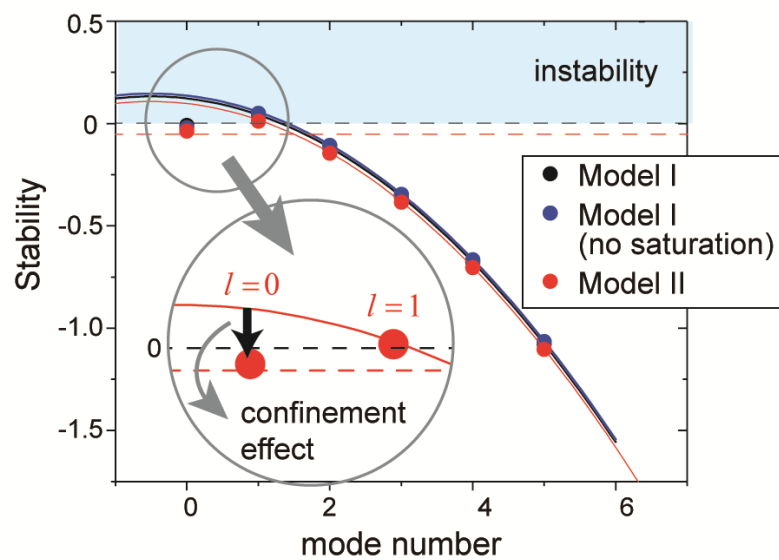

A

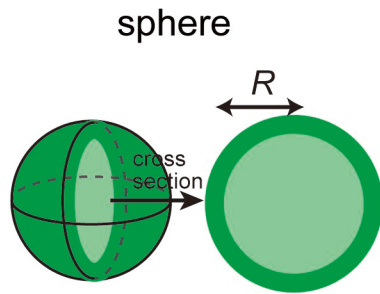

B

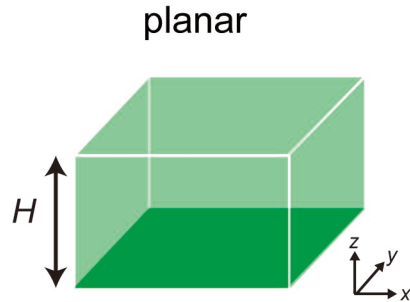

C

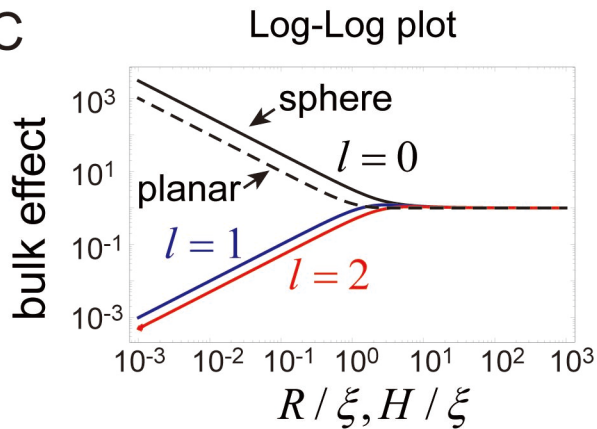

D

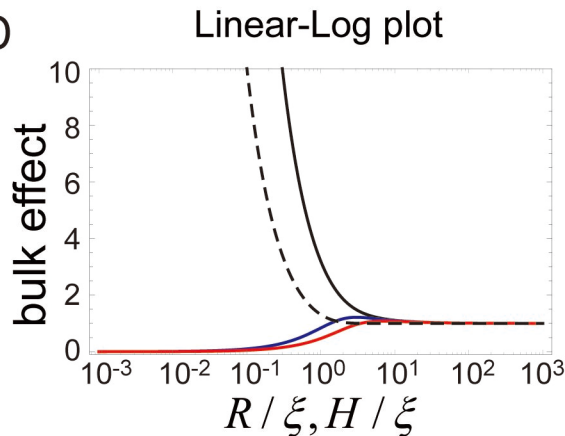

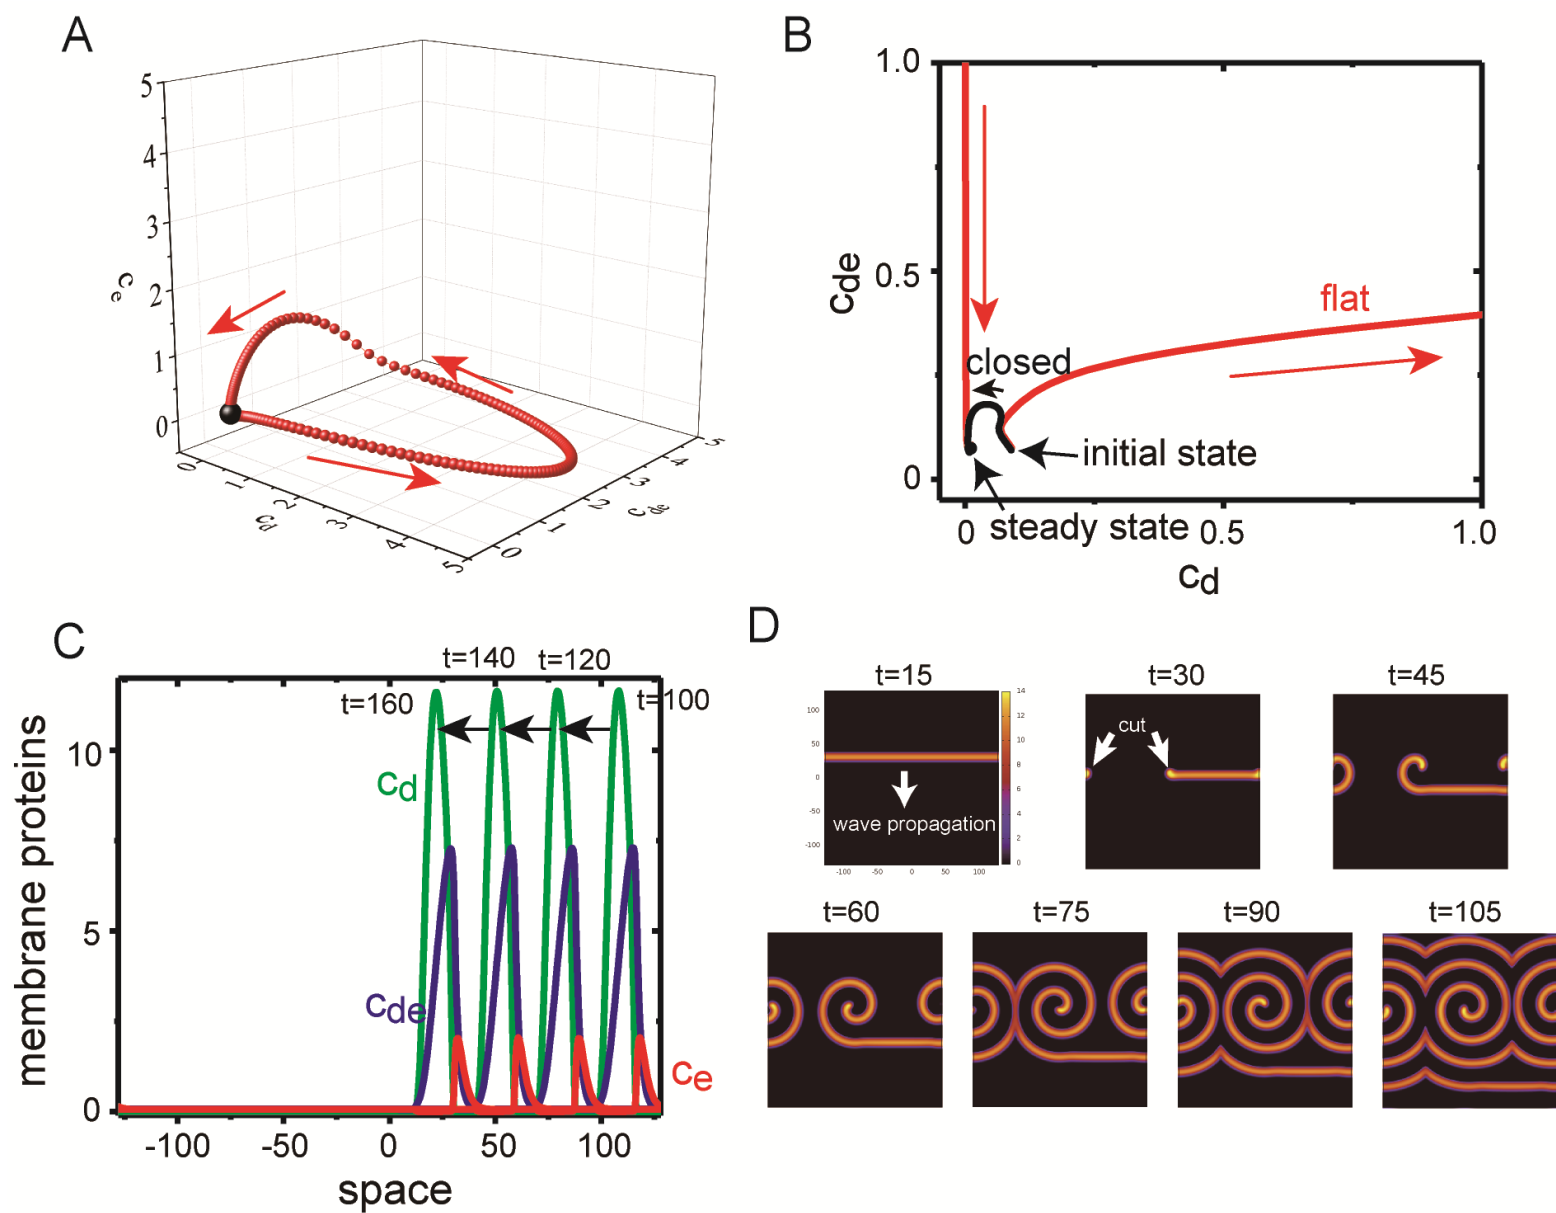

## experiment

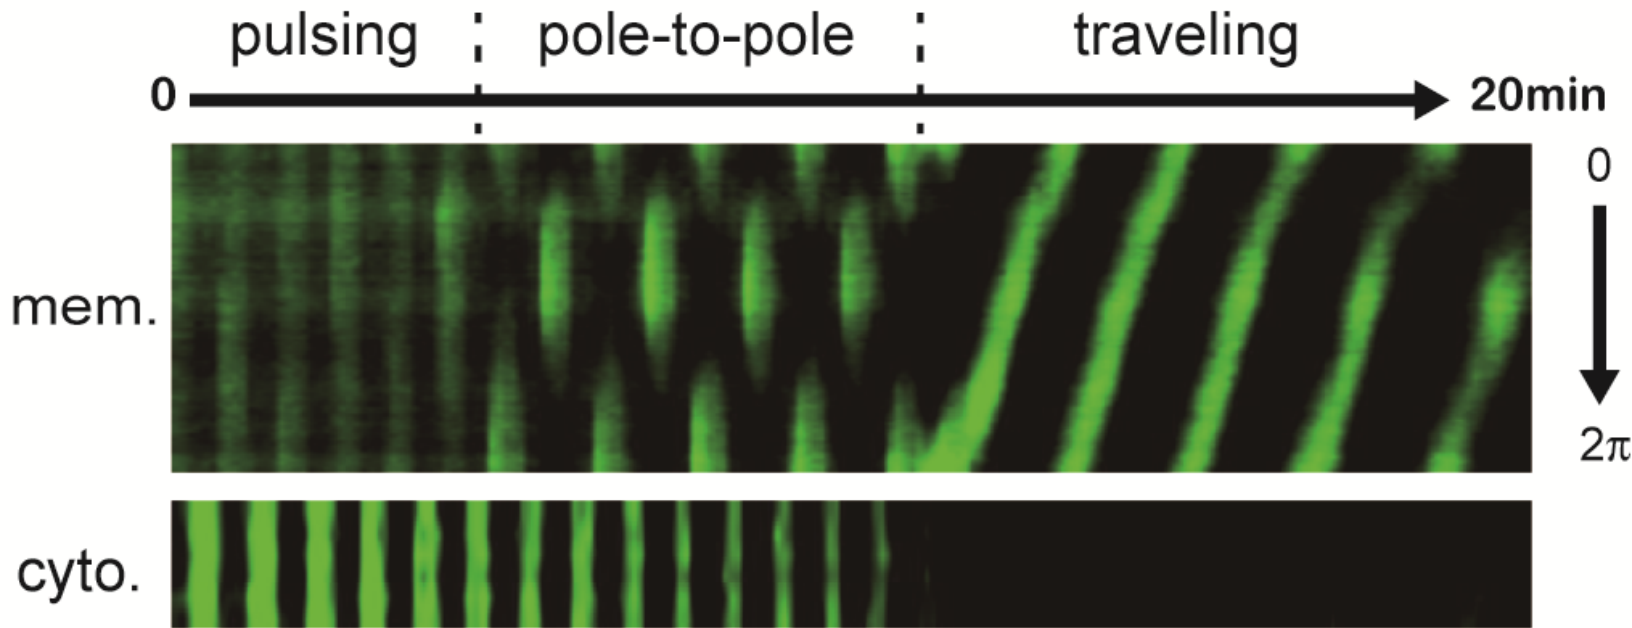

## simulation

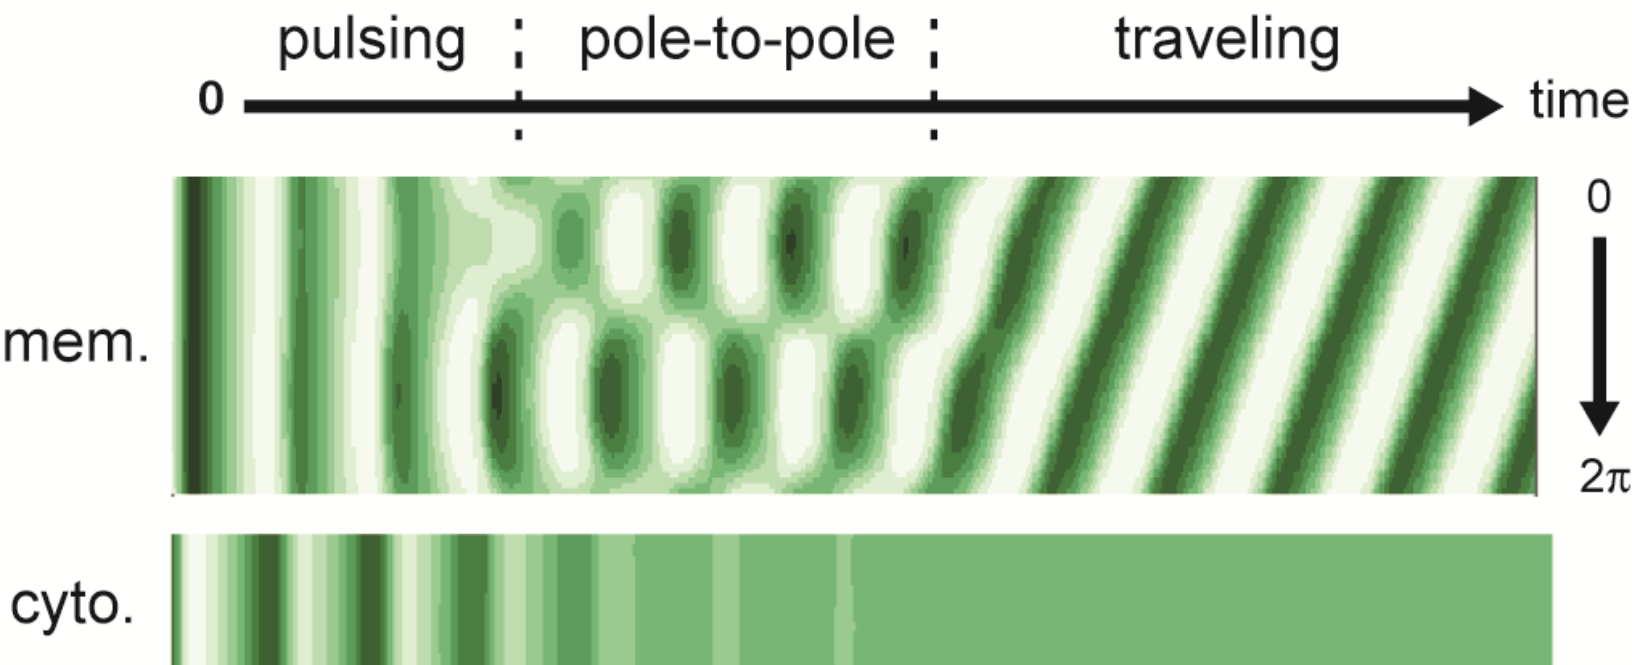



A

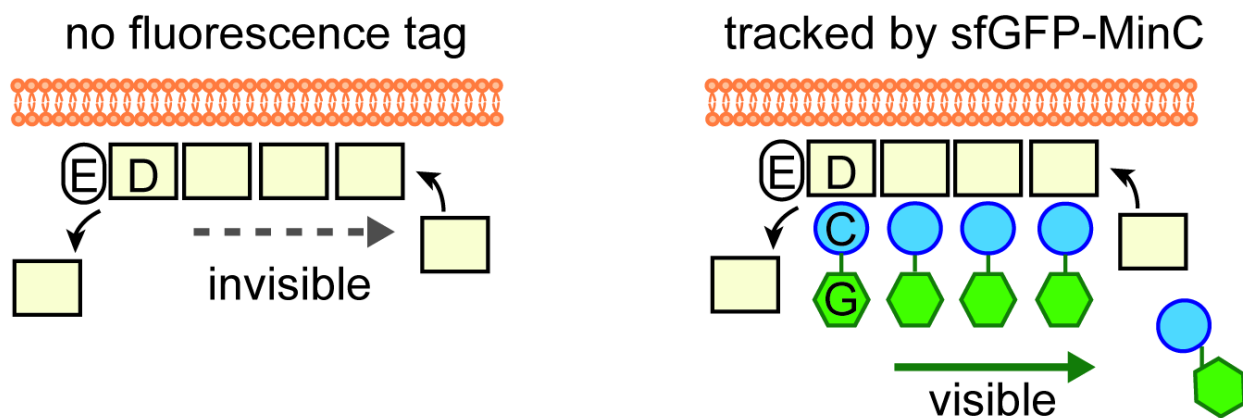

B

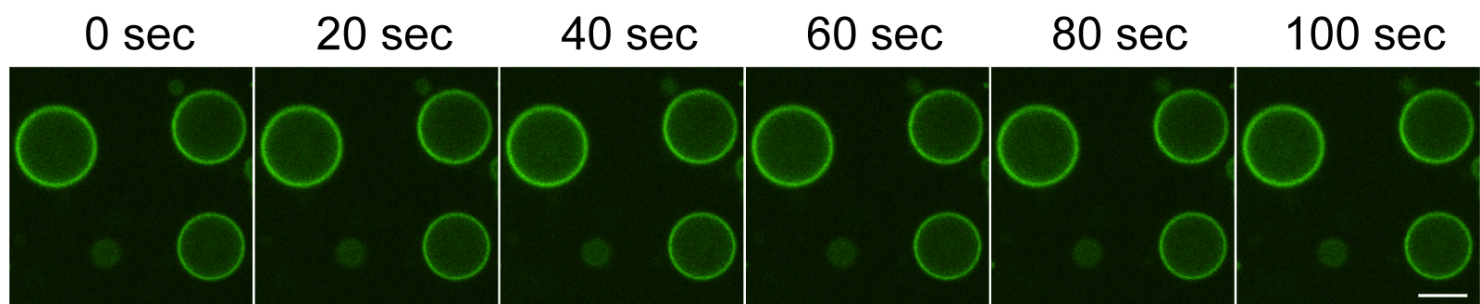

MinD + MinE + sfGFP-MinC + ATP

C

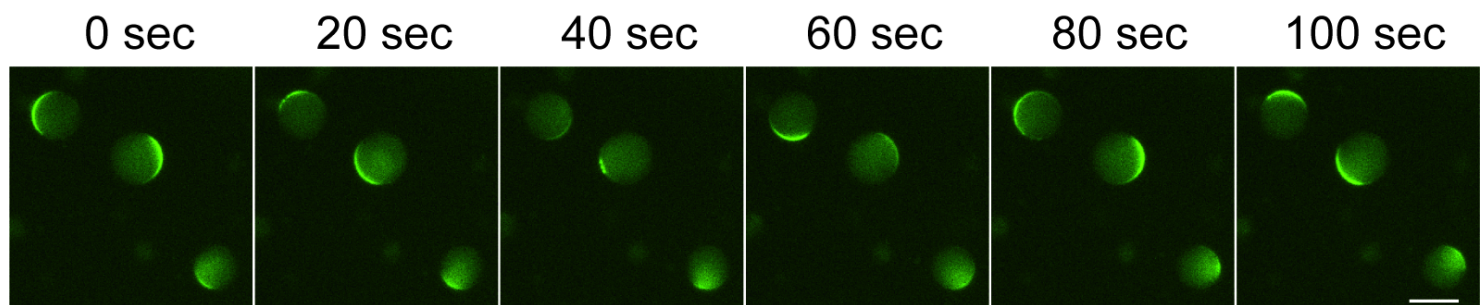

MinD + MinE + sfGFP-MinC + ATP + 100 mg/mL BSA

MinD wt  
with ADP

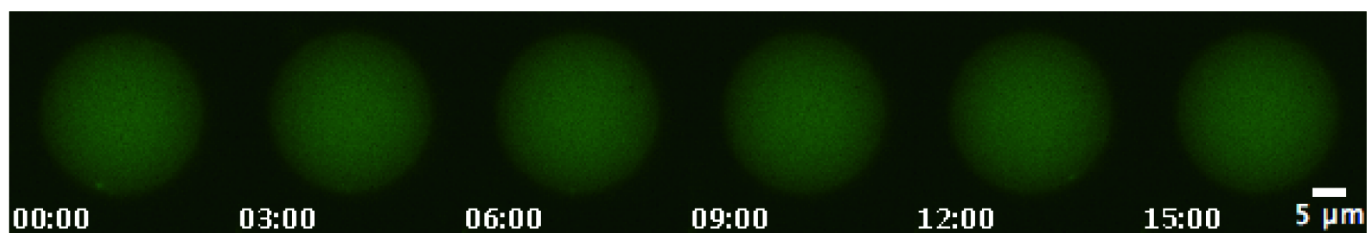

MinD wt  
with ATP $\gamma$ S

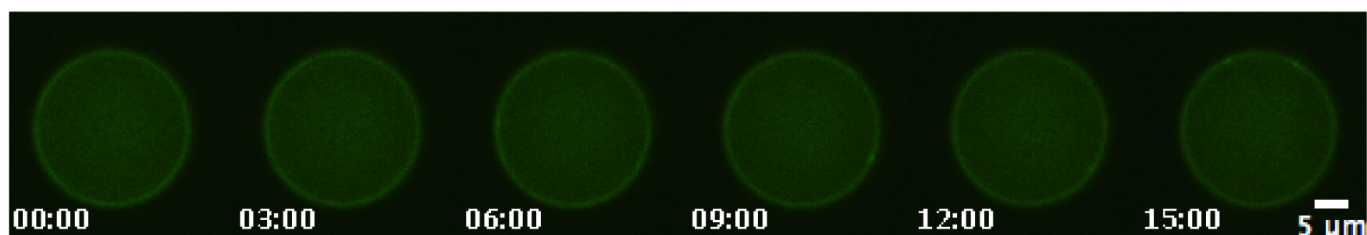

MinD K11A  
with ATP

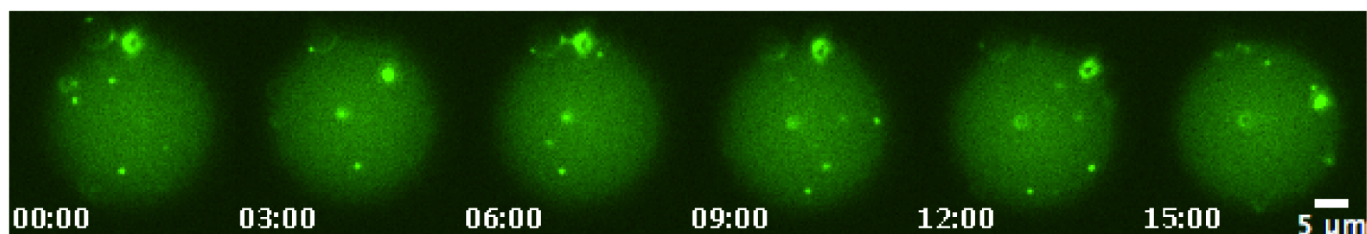

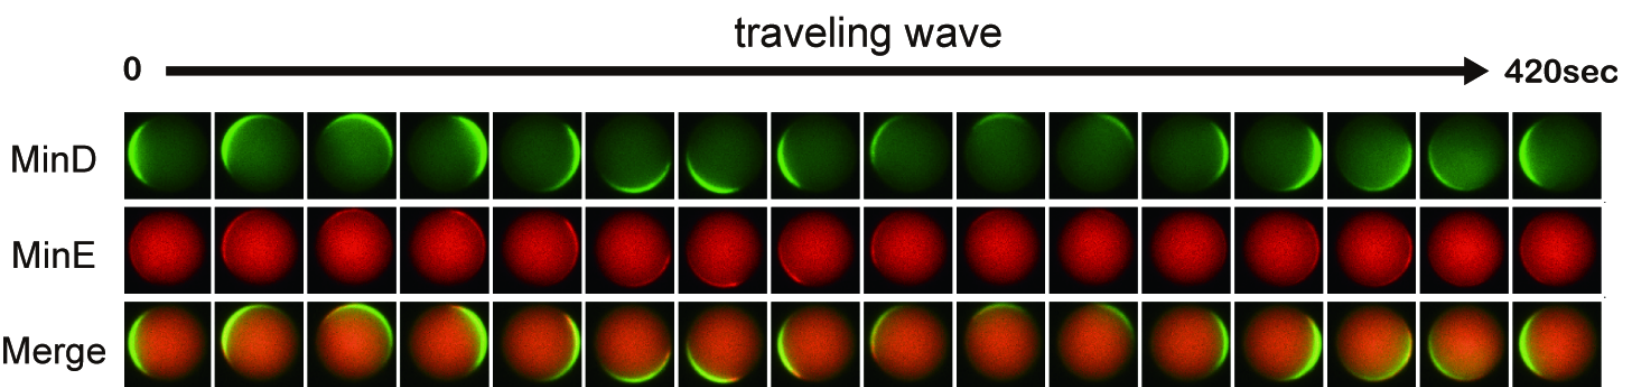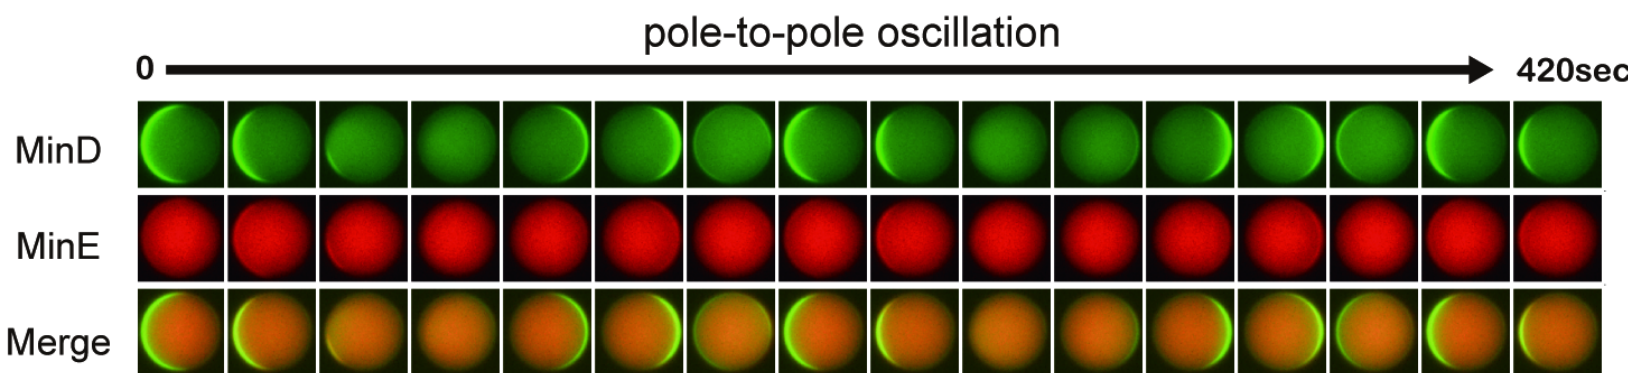

+50 mg/mL BSA

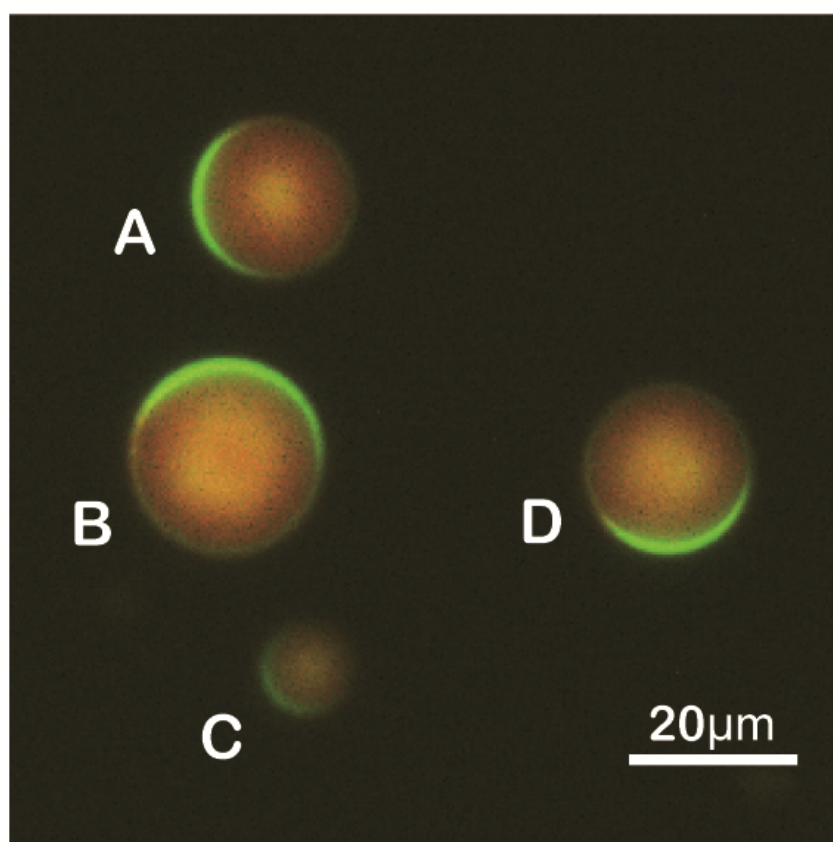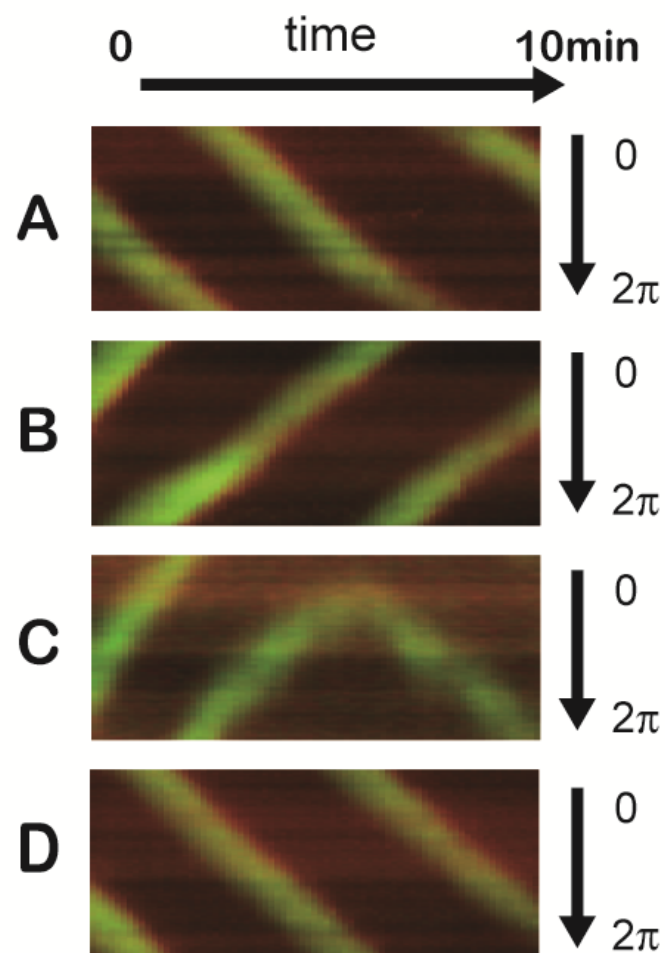

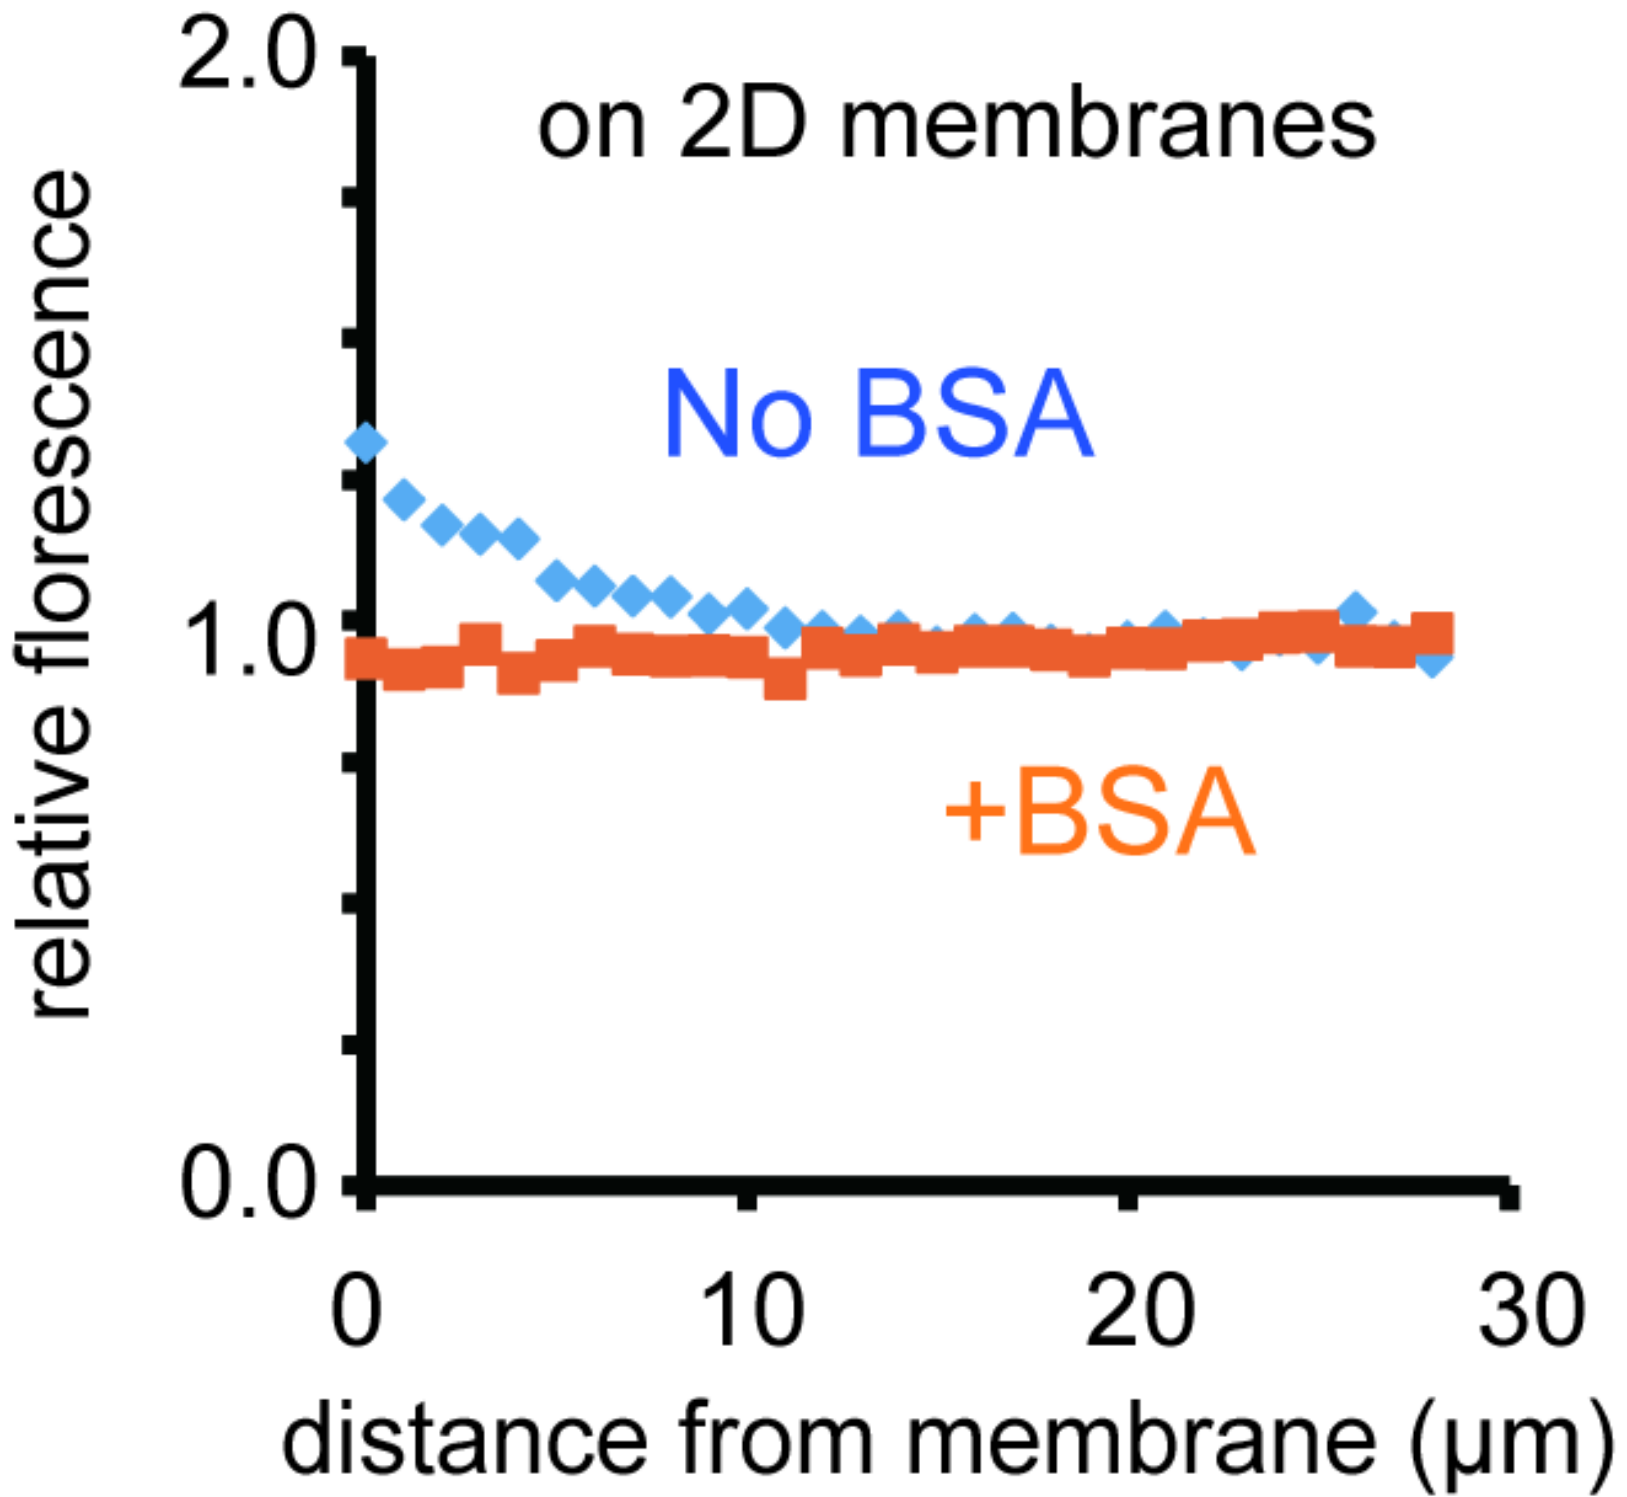



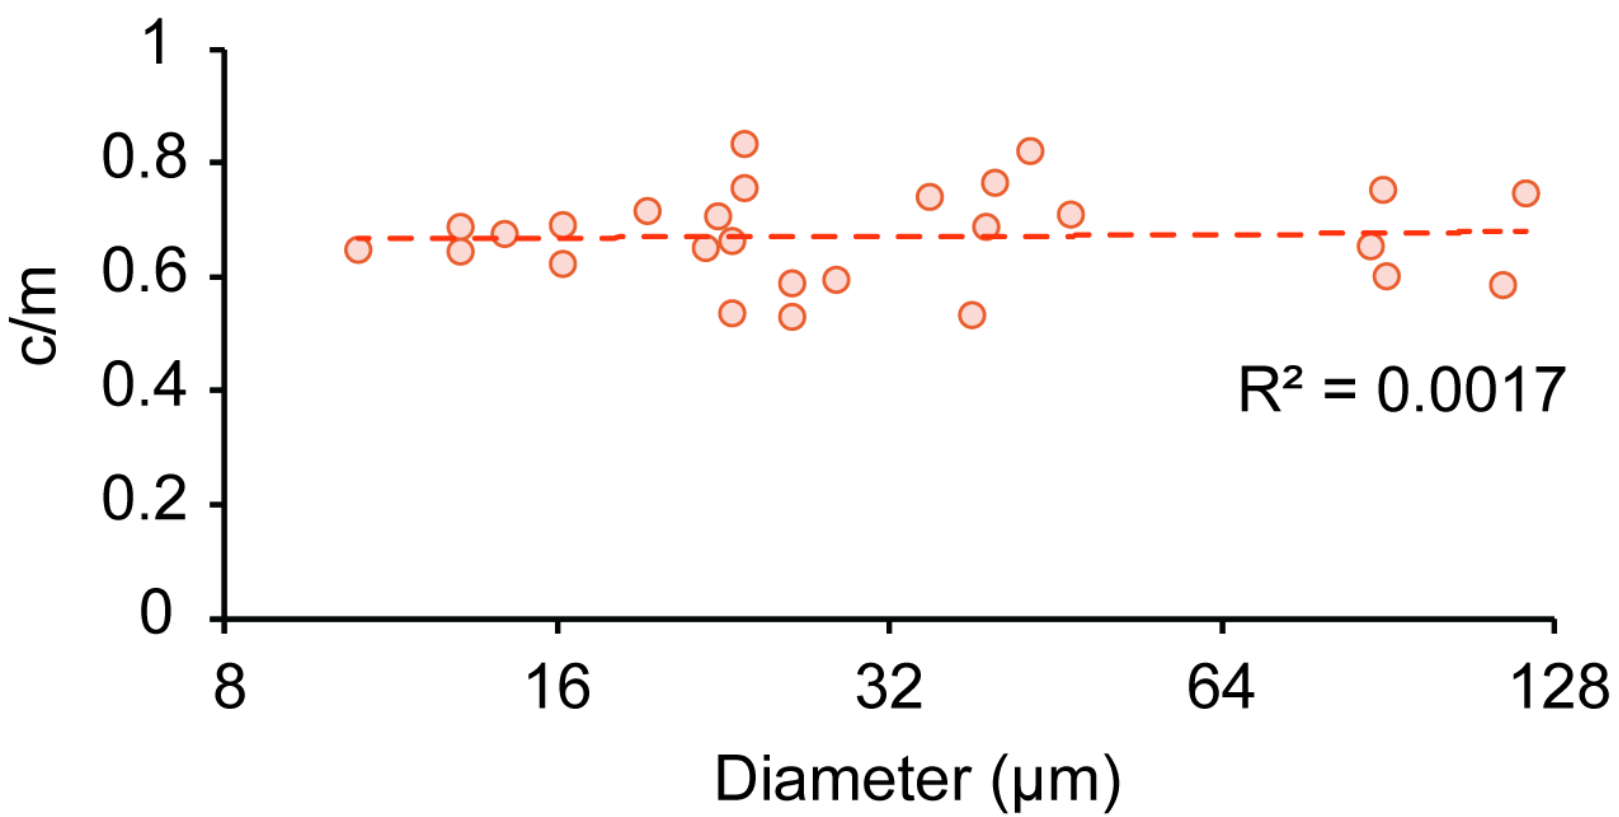

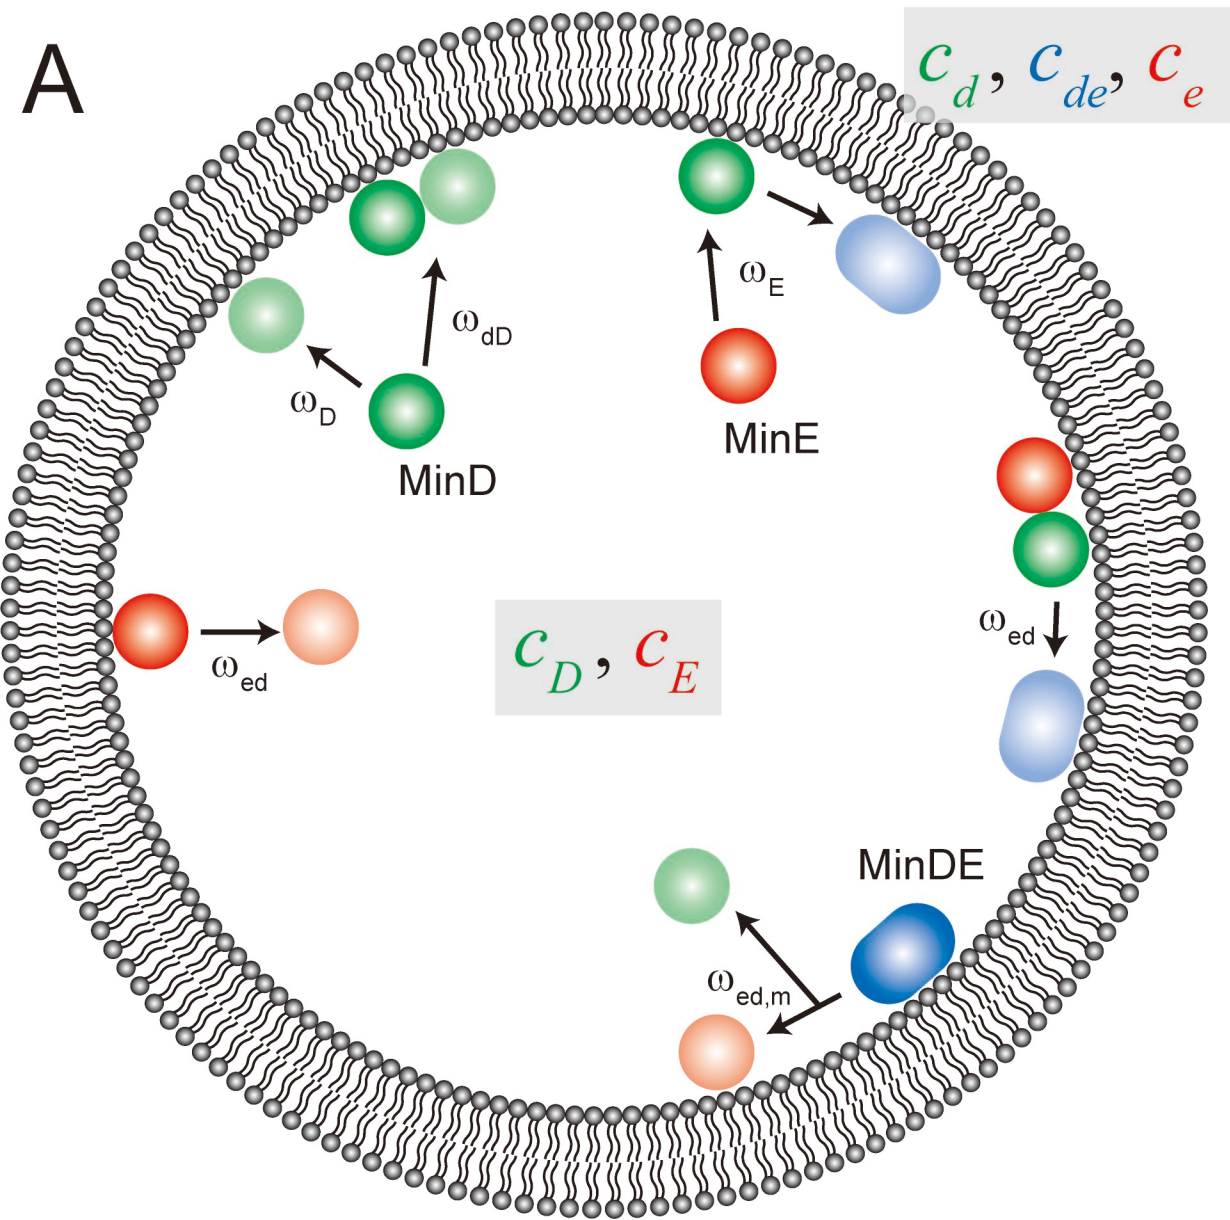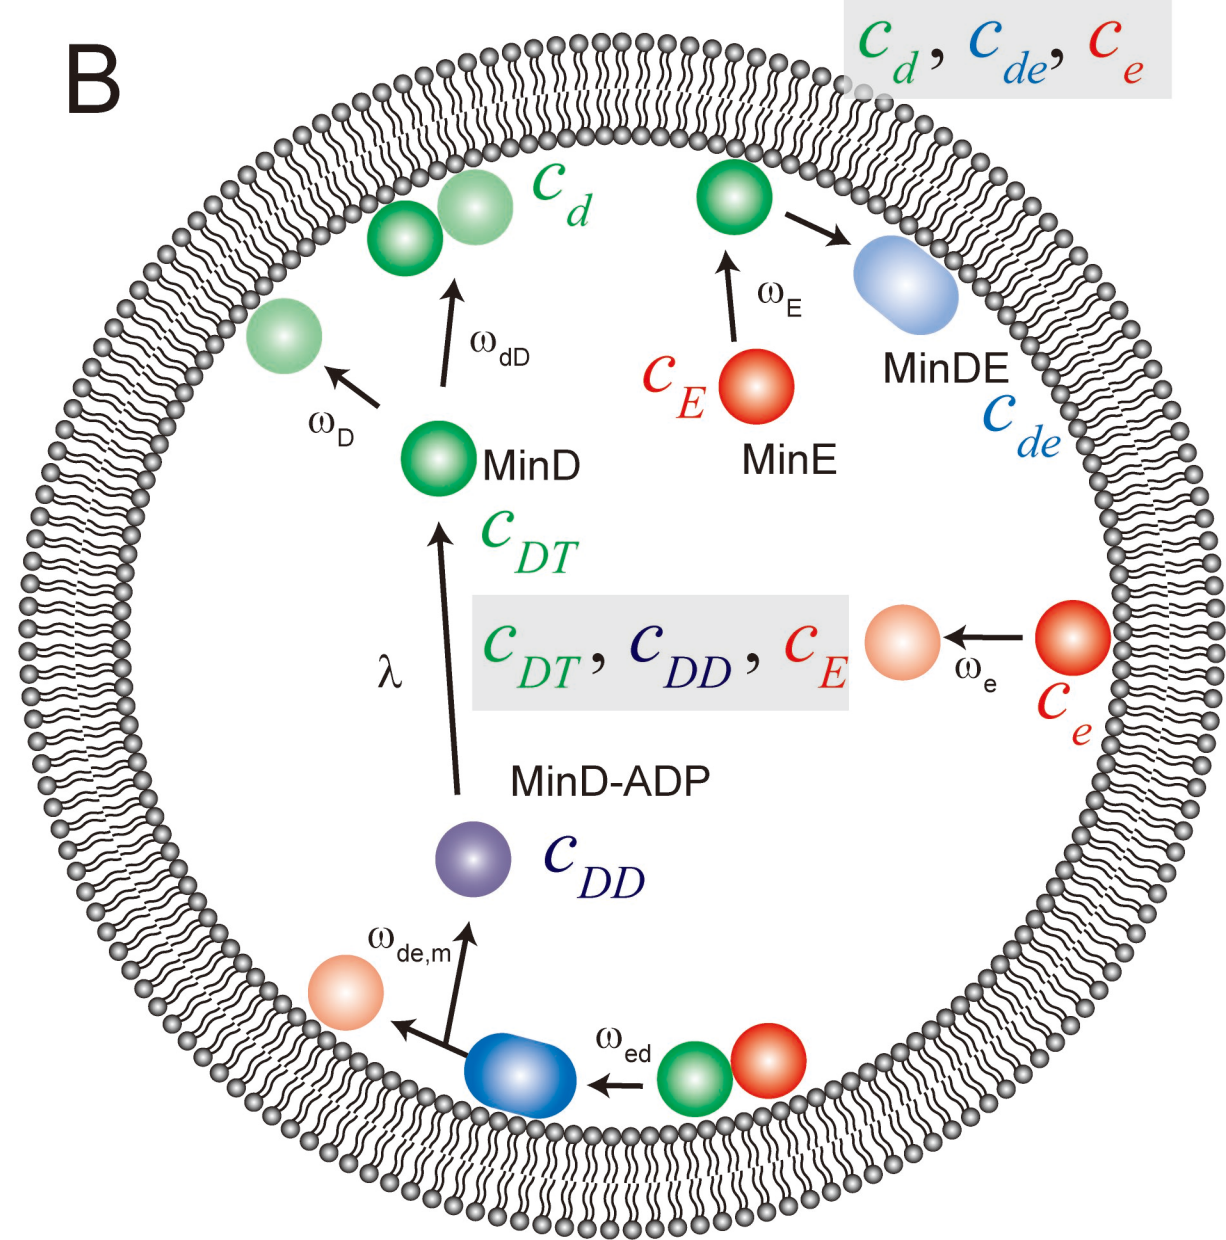

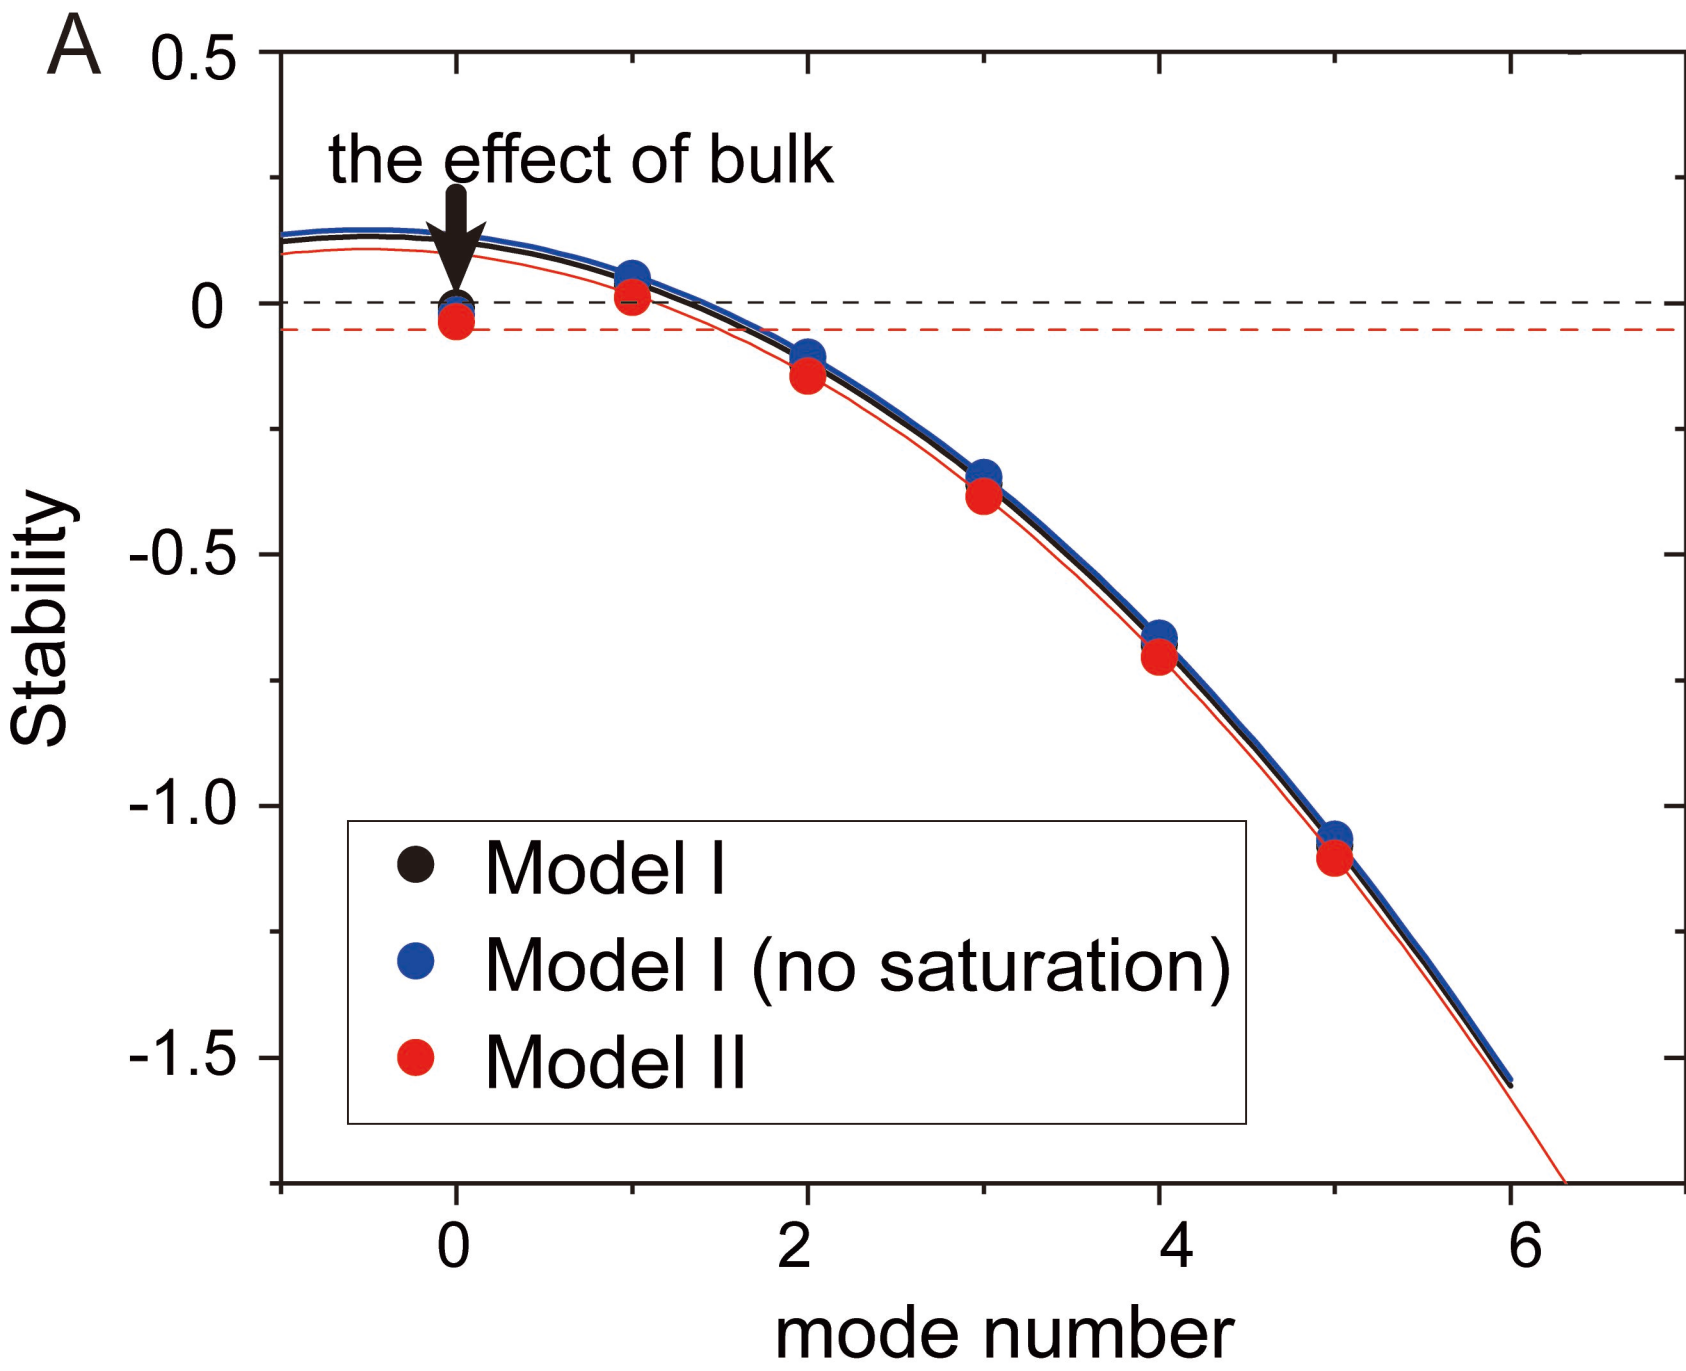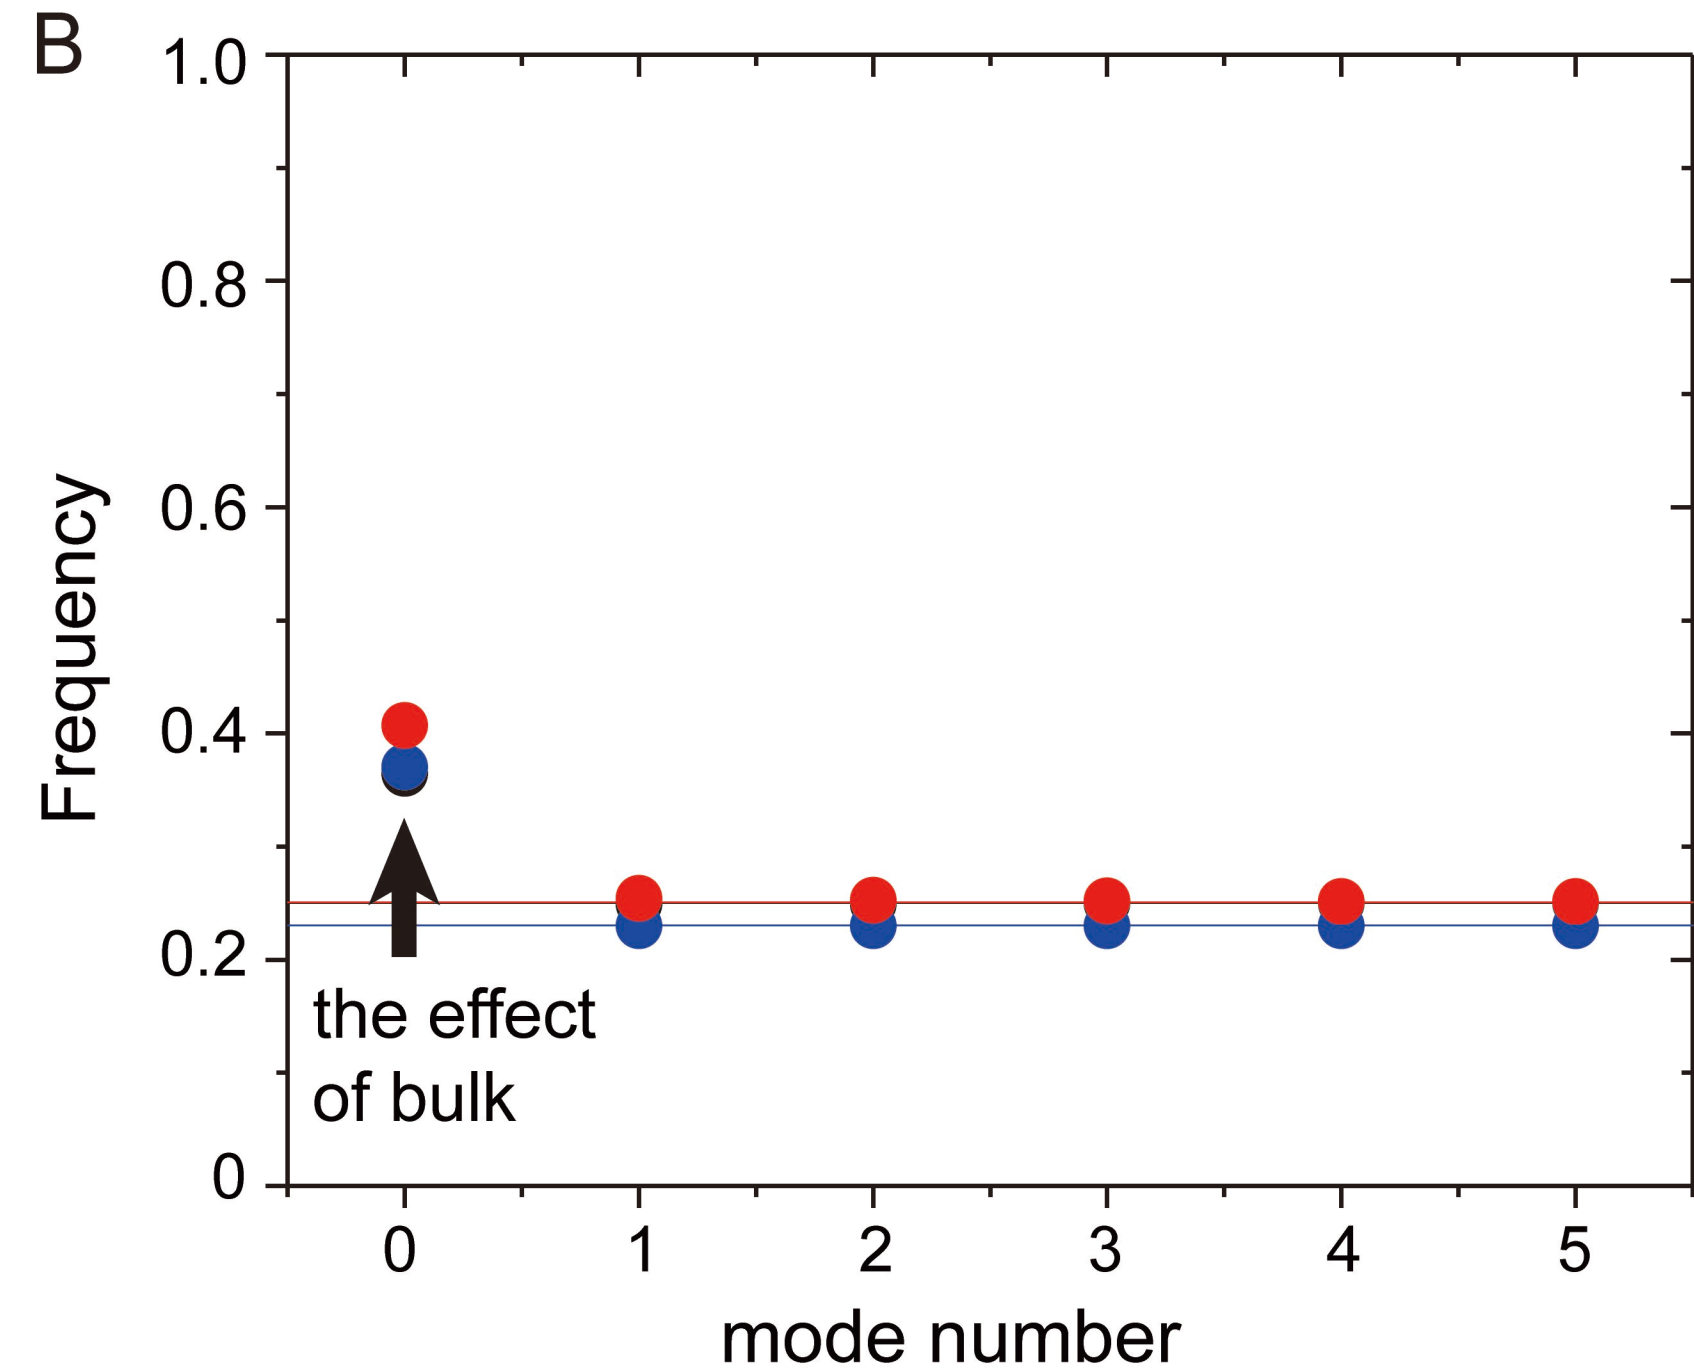

Source: https://www.biorxiv.org/content/10.1101/641662v1.full.pdf
